# Supplementary material for: Stereoselective synthesis of C3-tetrasubstituted oxindoles via copper catalyzed asymmetric propargylation
Source: Royal Society of Chemistry journal article supplement (doi:10.1039/d2ra04603b), 2022-01-01
Supplement: d2ra04603b1.pdf [file d2ra04603b1.pdf]

## Supporting Information

### **Stereoselective Synthesis of C3-Tetrasubstituted oxindoles *via* Copper Catalyzed Asymmetric Propargylation**

**Jiao-Mei Wang,<sup>a,1</sup> Yu Zhao,<sup>b,1</sup> Chang-Sheng Yao,<sup>\*,c</sup> and Kai Zhang<sup>\*,c</sup>**

<sup>a</sup> School of Materials and Chemical Engineering, Xuzhou University of Technology, Xuzhou 221018, P R China

<sup>b</sup> College of Chemistry and Chemical Engineering, Yan'an University, Yan'an, Shaanxi 716000, P R China

<sup>c</sup> Jiangsu Key Lab of Green Synthetic Chemistry for Functional Materials, School of Chemistry and Materials Science, Jiangsu Normal University, Xuzhou, Jiangsu 221116, P R China

<sup>1</sup> Jiaomei Wang and Yu Zhao contributed equally to this work.

E-mail: zhangkai@jsnu.edu.cn.

### **Table of Contents**

---

|                                                                                |            |
|--------------------------------------------------------------------------------|------------|
| <b>1. General Information.....</b>                                             | <b>S2</b>  |
| <b>2. Preparation of the Materials.....</b>                                    | <b>S2</b>  |
| <b>3. General Procedures of products.....</b>                                  | <b>S3</b>  |
| <b>4. Characterization Data of the Products.....</b>                           | <b>S4</b>  |
| <b>5. X-Ray Structures of Product (<i>S,R</i>)-3i and (<i>R,S</i>)-3m.....</b> | <b>S11</b> |
| <b>6. Copies of <sup>1</sup>H and <sup>13</sup>C NMR Spectra.....</b>          | <b>S13</b> |
| <b>7. Copies of HPLC Chromatography.....</b>                                   | <b>S50</b> |

## 1. General Information

Unless otherwise noted, materials were purchased from commercial suppliers and used without further purification. All the solvents were treated according to standard methods. Flash column chromatography was performed using 200-300 mesh silica gel.  $^1\text{H}$  NMR spectra were recorded on 400 MHz spectrophotometers. Chemical shifts ( $\delta$ ) are reported in ppm from the resonance of tetramethyl silane as the internal standard (TMS: 0.00 ppm). Data are reported as follows: chemical shift, multiplicity (s = singlet, d = doublet, t = triplet, m = multiplet), coupling constants (Hz) and integration.  $^{13}\text{C}$  NMR spectra were recorded on 100 MHz with complete proton decoupling spectrophotometers ( $\text{CDCl}_3$ : 77.0 ppm). Enantiomeric excesses (ee) were determined by HPLC analysis on ThermoFisher UltiMate 3000 chiral HPLC with chiral AD-H, IC-H, OJ-H columns with hexane and *i*PrOH as solvents. The high resolution mass spectra (HRMS) were measured on a Shimadzu LCMS-IT-TOF mass spectrometer or DIONEX UltiMate 3000 & Bruker Compact TOF mass spectrometer by ESI.

## 2. Preparation of the Substrates

All the solvents were treated according to standard methods and all chemicals were used without purification. The 2-oxindole-3-carboxylate esters **1**<sup>1</sup> and terminal propargylic esters **2**<sup>2</sup> were known compounds or prepared from conventional methods.

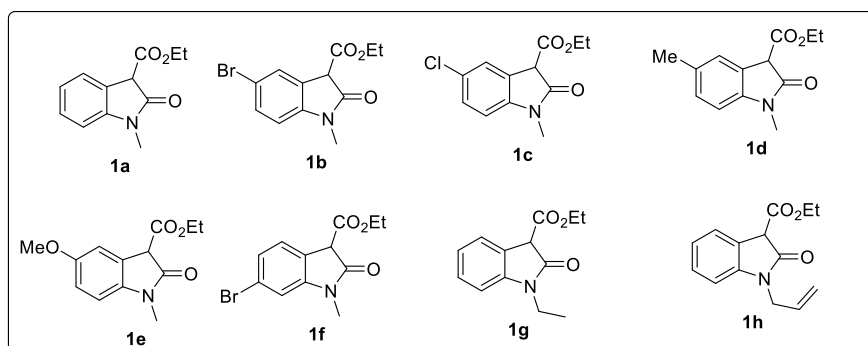

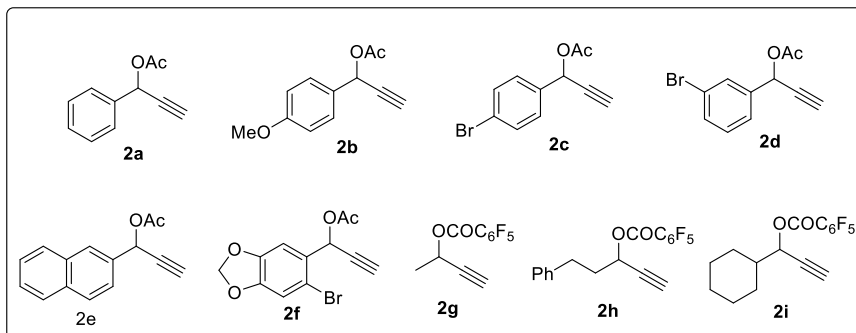

### 3. General Procedures of the Products

#### 3.1 General procedure for the synthesis of products 3.

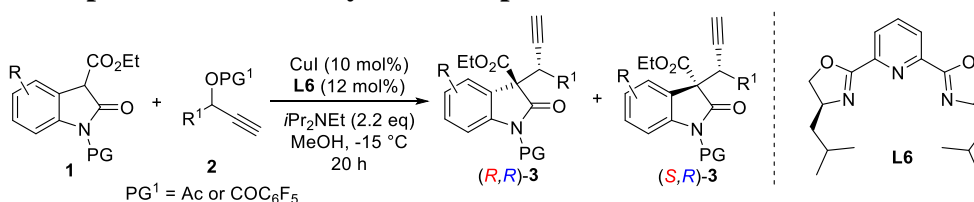

**Procedure:** An oven-dried 10 mL Schlenk tube equipped with a magnetic stir bar was charged with CuI (0.02 mmol, 10 mol%), chiral PyBOX ligand **L6** (0.024 mmol, 12 mol%) and MeOH (3 mL). The resulting solution was stirred for 1 h at room temperature. Then 2-oxindole-3-carboxylate esters **1** (0.2 mmol, 1.0 eq) and *i*Pr<sub>2</sub>NEt (0.44 mmol, 2.2 eq) were added stirring for 5 min at room temperature before cooled to -15 °C. Then the propargylic acetate **2** (0.3 mmol, 1.5 eq) were introduced at -15 °C. The resulting solution was stirred until complete conversion of substrate **1** as monitored by TLC analysis. The resulting mixture was evaporated and purified by flash column chromatography on silica gel (PE/EA=20/1-10/1) to give product **3**. All the products **3** were prepared according to the above procedure.

#### 3.2 General procedure for the Click reaction of (S,R)-3f.

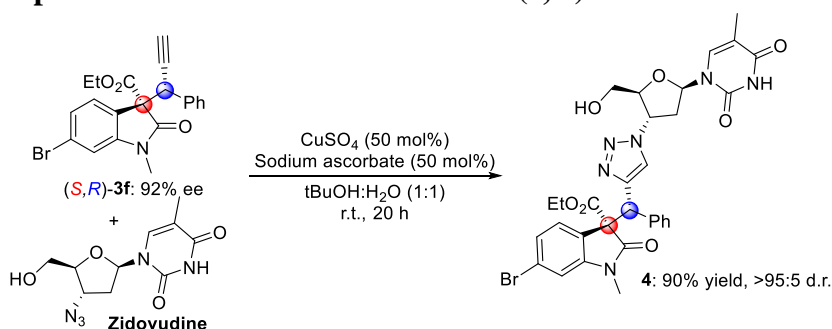

**Procedure:** Under argon atmosphere, a flame-dried 10 ml Schlenk tube was charged with

compound (*S,R*)-**3f** (0.1 mmol, 1.0 eq), zidovudine (0.11 mmol, 1.1 eq), tBuOH (1.0 mL) and a stir bar was added a freshly prepared solution of CuSO<sub>4</sub> (0.05 mmol, 0.5 eq) and sodium ascorbate (0.05 mmol, 0.5 eq) in H<sub>2</sub>O (1.0 mL). The resulting solution was stirred at room temperature for 20 h. The resulting mixture was concentrated and subjected to column chromatography (DCM/MeOH = 20/1) to give product **4** as a white solid.

#### 4. Characterization Data of Products

##### Ethyl (*R*)-1-methyl-2-oxo-3-((*R*)-1-phenylprop-2-yn-1-yl)indoline-3-carboxylate ((*R,R*)-**3a**)

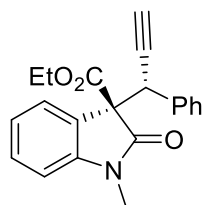

White solid, 36% yield;  $[\alpha]_D^{23} = 1.532$  ( $c = 1.00$  in CH<sub>2</sub>Cl<sub>2</sub>); 91% ee, determined by HPLC analysis (Chiralpak AD column, hexane/*i*-PrOH, 70:30 v/v, flow rate 1 mL/min,  $\lambda = 254$  nm, 25 °C),  $t_R$  (major) = 4.84 min,  $t_R$  (minor) = 5.90 min; <sup>1</sup>H NMR (400 MHz, CDCl<sub>3</sub>):  $\delta$  (ppm) 7.84 (d,  $J = 7.5$  Hz, 1H), 7.37 – 7.23 (m, 1H), 7.21 – 6.82 (m, 6H), 6.52 (d,  $J = 7.8$  Hz, 1H), 5.05 – 4.79 (m, 1H), 4.29 (q,  $J = 7.1$  Hz, 2H), 2.77 (s, 3H), 2.45 (d,  $J = 1.4$  Hz, 1H), 1.27 (t,  $J = 7.1$  Hz, 3H); <sup>13</sup>C NMR (100 MHz, CDCl<sub>3</sub>):  $\delta$  (ppm) 170.81, 167.21, 143.93, 133.99, 129.29, 128.92, 127.68, 127.39, 125.99, 125.27, 122.46, 107.83, 82.40, 73.20, 63.50, 62.36, 42.81, 26.05, 14.04; HRMS (ESI) for: C<sub>21</sub>H<sub>20</sub>NO<sub>3</sub> [M+H]<sup>+</sup>: calcd 334.1438, found 334.1447.

##### Ethyl (*S*)-1-methyl-2-oxo-3-((*R*)-1-phenylprop-2-yn-1-yl)indoline-3-carboxylate ((*S,R*)-**3a**)

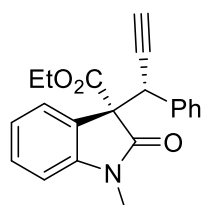

White solid, 56% yield;  $[\alpha]_D^{23} = 1.735$  ( $c = 1.00$  in CH<sub>2</sub>Cl<sub>2</sub>); 95% ee, determined by HPLC analysis (Chiralpak AD column, hexane/*i*-PrOH, 70:30 v/v, flow rate 1 mL/min,  $\lambda = 254$  nm, 25 °C),  $t_R$  (major) = 8.90 min,  $t_R$  (minor) = 17.52 min; <sup>1</sup>H NMR (400 MHz, CDCl<sub>3</sub>):  $\delta$  (ppm) 7.28 – 7.00 (m, 9H), 6.62 (d,  $J = 7.8$  Hz, 1H), 4.84 (d,  $J = 2.6$  Hz, 1H), 4.29 – 4.18 (m, 2H), 3.01 (s, 3H), 2.32 (d,  $J = 2.5$  Hz, 1H), 1.23 (t,  $J = 7.1$  Hz, 3H); <sup>13</sup>C NMR (100 MHz, CDCl<sub>3</sub>):  $\delta$  (ppm) 171.10, 167.55, 144.13, 134.23, 129.38, 129.32, 127.84, 127.61, 125.19, 125.03, 122.09, 107.91, 80.73, 73.13, 63.25, 62.29, 43.13, 26.17, 13.95; HRMS (ESI) for: C<sub>21</sub>H<sub>20</sub>NO<sub>3</sub> [M+H]<sup>+</sup>: calcd 334.1438, found 334.1447.

##### Ethyl (*R*)-5-bromo-1-methyl-2-oxo-3-((*R*)-1-phenylprop-2-yn-1-yl)indoline-3-carboxylate ((*R,R*)-**3b**)

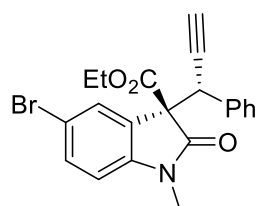

White solid, 42% yield,  $[\alpha]_D^{23} = -3.473$  ( $c = 1.00$  in CH<sub>2</sub>Cl<sub>2</sub>); 90% ee, determined by HPLC analysis (Chiralpak AD column, hexane/*i*-PrOH, 70:30 v/v, flow rate 1 mL/min,  $\lambda = 254$  nm, 25 °C),  $t_R$  (major) = 5.29 min,  $t_R$  (minor) = 6.28 min; <sup>1</sup>H NMR (400 MHz, CDCl<sub>3</sub>):  $\delta$  (ppm) 8.04 – 7.90 (m, 1H), 7.42 – 7.39 (m, 1H), 7.18 – 6.91 (m, 5H), 6.39 (d,  $J = 8.3$  Hz, 1H), 4.89 (d,  $J = 2.5$  Hz, 1H), 4.30 (q,  $J = 7.1$  Hz, 2H), 2.75 (s, 3H), 2.50 (d,  $J = 2.1$  Hz, 1H), 1.29

(t,  $J = 7.1$  Hz, 3H);  $^{13}\text{C}$  NMR (100 MHz,  $\text{CDCl}_3$ ):  $\delta$  (ppm) 170.22, 166.49, 142.96, 133.56, 132.13, 129.07, 128.84, 127.87, 127.56, 127.14, 115.04, 109.20, 81.79, 73.77, 63.47, 62.63, 42.85, 26.13, 14.00; HRMS (ESI) for:  $\text{C}_{21}\text{H}_{19}\text{BrNO}_3$   $[\text{M}+\text{H}]^+$ : calcd 412.0543, found 412.0544.

**Ethyl (S)-5-bromo-1-methyl-2-oxo-3-((R)-1-phenylprop-2-yn-1-yl)indoline-3-carboxylate ((S,R)-3b)**

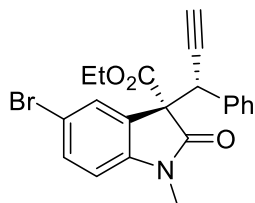

White solid, 51% yield,  $[\alpha]_{\text{D}}^{23} = 1.390$  ( $c = 1.00$  in  $\text{CH}_2\text{Cl}_2$ ); 88% ee, determined by HPLC analysis (Chiralpak AD column, hexane/*i*-PrOH, 70:30 v/v, flow rate 1 mL/min,  $\lambda = 254$  nm, 25 °C),  $t_{\text{R}}$  (major) = 31.05 min,  $t_{\text{R}}$  (minor) = 37.83 min;  $^1\text{H}$  NMR (400 MHz,  $\text{CDCl}_3$ ):  $\delta$  (ppm) 7.41 – 7.38 (m, 1H), 7.24 – 7.23 – 7.18 (m, 5H), 7.08 (t,  $J = 1.5$  Hz, 1H), 6.54 (d,  $J = 8.3$  Hz, 1H), 4.85 (d,  $J = 2.5$  Hz, 1H), 4.24 (q,  $J = 7.1$  Hz, 2H), 3.02 (s, 3H), 2.30 (d,  $J = 1.2$  Hz, 1H), 1.24 (t,  $J = 7.1$  Hz, 3H);  $^{13}\text{C}$  NMR (100 MHz,  $\text{CDCl}_3$ ):  $\delta$  (ppm) 170.58, 166.81, 143.24, 133.87, 132.18, 129.31, 128.64, 128.18, 127.84, 126.80, 114.58, 109.30, 80.23, 73.40, 63.32, 62.60, 43.23, 26.33, 13.96; HRMS (ESI) for:  $\text{C}_{21}\text{H}_{19}\text{BrNO}_3$   $[\text{M}+\text{H}]^+$ : calcd 412.0543, found 412.0544.

**Ethyl (R)-5-chloro-1-methyl-2-oxo-3-((R)-1-phenylprop-2-yn-1-yl)indoline-3-carboxylate ((R,R)-3c)**

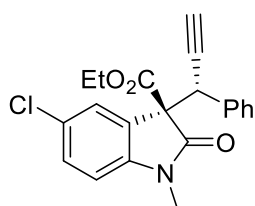

White solid, 44% yield,  $[\alpha]_{\text{D}}^{23} = 0.898$  ( $c = 1.00$  in  $\text{CH}_2\text{Cl}_2$ ); 90% ee, determined by HPLC analysis (Chiralpak AD column, hexane/*i*-PrOH, 70:30 v/v, flow rate 1 mL/min,  $\lambda = 254$  nm, 25 °C),  $t_{\text{R}}$  (major) = 5.20 min,  $t_{\text{R}}$  (minor) = 6.38 min;  $^1\text{H}$  NMR (400 MHz,  $\text{CDCl}_3$ ):  $\delta$  (ppm) 7.83 (t,  $J = 1.6$  Hz, 1H), 7.30 – 7.22 (m, 1H), 7.14 – 6.91 (m, 5H), 6.45 – 6.42 (m, 1H), 4.91 – 4.88 (m, 1H), 4.30 (q,  $J = 7.1$  Hz, 2H), 2.76 (s, 3H), 2.50 (d,  $J = 1.5$  Hz, 1H), 1.29 (t,  $J = 7.1$  Hz, 3H);  $^{13}\text{C}$  NMR (100 MHz,  $\text{CDCl}_3$ ):  $\delta$  (ppm) 170.31, 166.49, 142.47, 133.55, 129.23, 128.83, 127.86, 127.77, 127.55, 126.79, 126.36, 108.70, 81.80, 73.75, 63.56, 62.62, 42.83, 26.16, 14.00; HRMS (ESI) for:  $\text{C}_{21}\text{H}_{19}\text{ClNO}_3$   $[\text{M}+\text{H}]^+$ : calcd 368.1048, found 368.1057.

**Ethyl (S)-5-chloro-1-methyl-2-oxo-3-((R)-1-phenylprop-2-yn-1-yl)indoline-3-carboxylate ((S,R)-3c)**

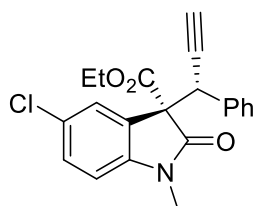

White solid, 53% yield,  $[\alpha]_{\text{D}}^{23} = 0.879$  ( $c = 1.00$  in  $\text{CH}_2\text{Cl}_2$ ); 87% ee, determined by HPLC analysis (Chiralpak AD column, hexane/*i*-PrOH, 70:30 v/v, flow rate 1 mL/min,  $\lambda = 254$  nm, 25 °C),  $t_{\text{R}}$  (major) = 28.99 min,  $t_{\text{R}}$  (minor) = 46.50 min;  $^1\text{H}$  NMR (400 MHz,  $\text{CDCl}_3$ ):  $\delta$  (ppm) 7.28 – 7.15 (m, 6H), 6.96 (t,  $J = 1.4$  Hz, 1H), 6.58 (d,  $J = 8.3$  Hz, 1H), 4.85 (d,  $J = 2.6$  Hz, 1H), 4.27 – 4.21 (m, 2H), 3.03 (s, 3H), 2.30 (d,  $J = 2.5$  Hz, 1H), 1.24 (t,  $J = 7.1$  Hz, 3H);  $^{13}\text{C}$  NMR (100 MHz,  $\text{CDCl}_3$ ):  $\delta$  (ppm) 170.80, 166.94, 142.89, 134.02, 129.44, 128.29, 127.97, 127.54, 126.59, 126.03, 108.92, 80.37, 73.52, 63.51, 62.71, 43.35,

26.48, 14.08; **HRMS** (ESI) for: C<sub>21</sub>H<sub>18</sub>ClNO<sub>3</sub>Na [M+Na]<sup>+</sup>: calcd 390.0867, found 390.0875.

**Ethyl (R)-1,5-dimethyl-2-oxo-3-((R)-1-phenylprop-2-yn-1-yl)indoline-3-carboxylate ((R,R)-3d)**

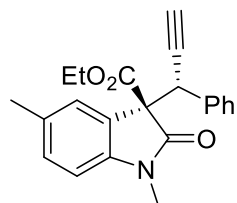

White solid, 34% yield,  $[\alpha]_D^{23} = 0.334$  (c = 1.00 in CH<sub>2</sub>Cl<sub>2</sub>); 90% ee, determined by HPLC analysis (Chiralpak AD column, hexane/*i*-PrOH, 70:30 v/v, flow rate 1 mL/min,  $\lambda = 254$  nm, 25 °C),  $t_R$  (major) = 4.74 min,  $t_R$  (minor) = 5.53 min; **<sup>1</sup>H NMR** (400 MHz, CDCl<sub>3</sub>):  $\delta$  (ppm) 7.65 (s, 1H), 7.14 – 6.88 (m, 5H), 6.41 (d,  $J = 7.9$  Hz, 1H), 4.94 – 4.83 (m, 1H), 4.33 – 4.24 (m, 2H), 2.75 (s, 3H), 2.44 (d,  $J = 3.6$  Hz, 1H), 2.42 (s, 3H), 1.28 (t,  $J = 7.1$  Hz, 3H); **<sup>13</sup>C NMR** (100 MHz, CDCl<sub>3</sub>):  $\delta$  (ppm) 170.77, 167.39, 141.59, 134.12, 131.95, 129.60, 128.97, 127.63, 127.39, 126.65, 125.22, 107.54, 82.50, 73.07, 63.51, 62.34, 42.73, 26.07, 21.35, 14.04; **HRMS** (ESI) for: C<sub>22</sub>H<sub>22</sub>NO<sub>3</sub> [M+H]<sup>+</sup>: calcd 348.1594, found 348.1604.

**Ethyl (S)-1,5-dimethyl-2-oxo-3-((R)-1-phenylprop-2-yn-1-yl)indoline-3-carboxylate ((S,R)-3d)**

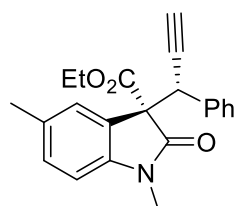

White solid, 50% yield,  $[\alpha]_D^{23} = 1.600$  (c = 1.00 in CH<sub>2</sub>Cl<sub>2</sub>); 95% ee, determined by HPLC analysis (Chiralpak AD column, hexane/*i*-PrOH, 70:30 v/v, flow rate 1 mL/min,  $\lambda = 254$  nm, 25 °C),  $t_R$  (major) = 11.53 min,  $t_R$  (minor) = 14.99 min; **<sup>1</sup>H NMR** (400 MHz, CDCl<sub>3</sub>):  $\delta$  (ppm) 7.22 – 7.08 (m, 5H), 7.05 (d,  $J = 7.9$  Hz, 1H), 6.87 (s, 1H), 6.50 (d,  $J = 7.9$  Hz, 1H), 4.82 (d,  $J = 2.4$  Hz, 1H), 4.24 (q,  $J = 7.1$  Hz, 2H), 2.98 (s, 3H), 2.31 (d,  $J = 3.9$  Hz, 3H), 1.24 (t,  $J = 7.1$  Hz, 3H); **<sup>13</sup>C NMR** (100 MHz, CDCl<sub>3</sub>):  $\delta$  (ppm) 171.05, 167.74, 141.75, 134.29, 131.58, 129.60, 129.33, 127.77, 127.51, 125.85, 124.97, 107.59, 80.87, 73.02, 63.28, 62.23, 43.02, 26.15, 21.08, 13.95; **HRMS** (ESI) for: C<sub>22</sub>H<sub>21</sub>NO<sub>3</sub>Na [M+Na]<sup>+</sup>: calcd 370.1414, found 370.1419.

**Ethyl (R)-5-methoxy-1-methyl-2-oxo-3-((R)-1-phenylprop-2-yn-1-yl)indoline-3-carboxylate ((R,R)-3e)**

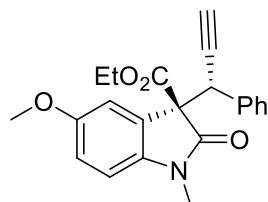

White solid, 38% yield,  $[\alpha]_D^{23} = 1.007$  (c = 1.00 in CH<sub>2</sub>Cl<sub>2</sub>); 92% ee, determined by HPLC analysis (Chiralpak AD column, hexane/*i*-PrOH, 70:30 v/v, flow rate 1 mL/min,  $\lambda = 254$  nm, 25 °C),  $t_R$  (major) = 5.73 min,  $t_R$  (minor) = 7.67 min; **<sup>1</sup>H NMR** (400 MHz, CDCl<sub>3</sub>):  $\delta$  (ppm) 7.48 (d,  $J = 2.6$  Hz, 1H), 7.13 – 7.11 – 6.96 (m, 5H), 6.83 – 6.80 (m, 1H), 6.43 – 6.41 (m, 1H), 4.89 (d,  $J = 2.7$  Hz, 1H), 4.29 (q,  $J = 7.2$  Hz, 2H), 3.86 (s, 3H), 2.74 (s, 3H), 2.46 (d,  $J = 1.5$  Hz, 2H), 1.27 (t,  $J = 7.1$  Hz, 3H); **<sup>13</sup>C NMR** (100 MHz, CDCl<sub>3</sub>):  $\delta$  (ppm) 170.47, 167.14, 155.60, 137.55, 133.98, 128.92, 128.68, 127.66, 127.55, 127.41, 127.29, 126.42, 113.64, 113.30, 108.08, 82.40, 73.24, 63.74, 62.35, 55.83, 42.69, 26.12, 14.03; **HRMS** (ESI) for: C<sub>22</sub>H<sub>22</sub>NO<sub>4</sub> [M+H]<sup>+</sup>: calcd 364.1543, found 364.1544.

**Ethyl (S)-5-methoxy-1-methyl-2-oxo-3-((R)-1-phenylprop-2-yn-1-yl)indoline-3-carboxylate ((S,R)-3e)**

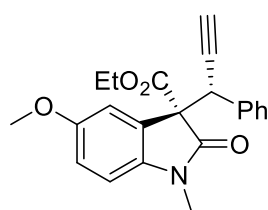

White solid, 49% yield,  $[\alpha]_D^{23} = -3.965$  ( $c = 1.00$  in  $\text{CH}_2\text{Cl}_2$ ); 94% ee, determined by HPLC analysis (Chiralpak AD column, hexane/*i*-PrOH, 70:30 v/v, flow rate 1 mL/min,  $\lambda = 254$  nm, 25 °C),  $t_R$  (major) = 15.61 min,  $t_R$  (minor) = 33.97 min;  $^1\text{H NMR}$  (400 MHz,  $\text{CDCl}_3$ ):  $\delta$  (ppm) 7.19 (m, 5H), 6.81 – 6.78 (m, 1H), 6.62 (d,  $J = 2.5$  Hz, 1H), 6.55 (d,  $J = 8.5$  Hz, 1H), 4.85 (d,  $J = 2.5$  Hz, 1H), 4.27 – 4.19 (m, 2H), 3.73 (s, 3H), 3.01 (s, 3H), 2.29 (d,  $J = 2.3$  Hz, 1H), 1.23 (t,  $J = 7.1$  Hz, 3H);  $^{13}\text{C NMR}$  (100 MHz,  $\text{CDCl}_3$ ):  $\delta$  (ppm) 170.82, 167.42, 155.33, 137.74, 134.29, 129.41, 127.90, 127.65, 126.03, 114.13, 112.39, 108.25, 80.67, 73.09, 63.63, 62.30, 55.75, 43.09, 26.29, 13.96; **HRMS** (ESI) for:  $\text{C}_{22}\text{H}_{21}\text{NO}_4\text{Na}$   $[\text{M}+\text{Na}]^+$ : calcd 386.1363, found 386.1361.

**Ethyl (R)-6-bromo-1-methyl-2-oxo-3-((R)-1-phenylprop-2-yn-1-yl)indoline-3-carboxylate ((R,R)-3f)**

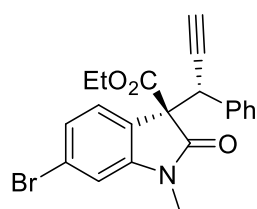

White solid, 45% yield,  $[\alpha]_D^{23} = 1.489$  ( $c = 1.00$  in  $\text{CH}_2\text{Cl}_2$ ); 91% ee, determined by HPLC analysis (Chiralpak AD column, hexane/*i*-PrOH, 70:30 v/v, flow rate 1 mL/min,  $\lambda = 254$  nm, 25 °C),  $t_R$  (major) = 5.24 min,  $t_R$  (minor) = 5.59 min;  $^1\text{H NMR}$  (400 MHz,  $\text{CDCl}_3$ ):  $\delta$  (ppm) 7.71 – 7.69 (m, 1H), 7.29 – 7.26 (m, 1H), 4.89 (d,  $J = 2.5$  Hz, 1H), 4.28 (q,  $J = 7.1$  Hz, 2H), 2.75 (s, 3H), 2.46 (d,  $J = 2.0$  Hz, 1H), 1.28 (t,  $J = 7.1$  Hz, 3H);  $^{13}\text{C NMR}$  (100 MHz,  $\text{CDCl}_3$ ):  $\delta$  (ppm) 170.60, 166.59, 145.19, 133.62, 128.85, 127.91, 127.61, 127.29, 125.34, 124.20, 123.07, 111.38, 82.05, 73.51, 63.32, 62.57, 42.70, 26.15, 14.01; **HRMS** (ESI) for:  $\text{C}_{21}\text{H}_{19}\text{BrNO}_3$   $[\text{M}+\text{H}]^+$ : calcd 412.0543, found 412.0544.

**Ethyl (S)-6-bromo-1-methyl-2-oxo-3-((R)-1-phenylprop-2-yn-1-yl)indoline-3-carboxylate ((S,R)-3f)**

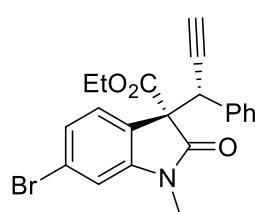

White solid, 50% yield,  $[\alpha]_D^{23} = 0.739$  ( $c = 1.00$  in  $\text{CH}_2\text{Cl}_2$ ); 92% ee, determined by HPLC analysis (Chiralpak AD column, hexane/*i*-PrOH, 70:30 v/v, flow rate 1 mL/min,  $\lambda = 254$  nm, 25 °C),  $t_R$  (major) = 7.14 min,  $t_R$  (minor) = 14.16 min;  $^1\text{H NMR}$  (400 MHz,  $\text{CDCl}_3$ ):  $\delta$  (ppm) 7.24 – 7.10 (m, 6H), 6.85 – 6.76 (m, 2H), 4.86 (d,  $J = 2.5$  Hz, 1H), 4.27 – 4.15 (m, 2H), 3.04 (s, 3H), 2.29 (d,  $J = 2.4$  Hz, 1H), 1.21 (t,  $J = 7.2$  Hz, 3H);  $^{13}\text{C NMR}$  (100 MHz,  $\text{CDCl}_3$ ):  $\delta$  (ppm) 170.97, 166.84, 145.50, 134.03, 129.35, 128.13, 127.86, 126.88, 124.91, 123.79, 123.15, 111.46, 80.30, 73.36, 63.16, 62.50, 43.02, 26.37, 13.93; **HRMS** (ESI) for:  $\text{C}_{21}\text{H}_{19}\text{BrNO}_3$   $[\text{M}+\text{H}]^+$ : calcd 412.0543, found 412.0544.

**Ethyl (R)-1-ethyl-2-oxo-3-((R)-1-phenylprop-2-yn-1-yl)indoline-3-carboxylate ((R,R)-3g)**

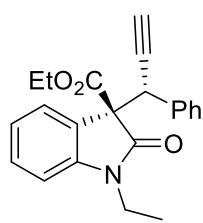

White solid, 37% yield,  $[\alpha]_D^{23} = 1.416$  ( $c = 1.00$  in  $\text{CH}_2\text{Cl}_2$ ); 67% ee, determined by HPLC analysis (Chiralpak AD column, hexane/*i*-PrOH, 70:30 v/v, flow rate 1 mL/min,  $\lambda = 254$  nm, 25 °C),  $t_R$  (major) = 4.89 min,  $t_R$  (minor) = 5.66 min;  $^1\text{H NMR}$  (400 MHz,  $\text{CDCl}_3$ ):  $\delta$  (ppm) 7.87 (d,  $J = 7.5$  Hz, 1H), 7.33 – 7.25 (m, 1H), 7.18 – 7.05 (m, 2H), 7.01 (t,  $J = 7.5$  Hz, 2H), 6.93 (d,  $J = 7.5$  Hz, 2H), 6.57 (d,  $J = 7.8$  Hz, 1H), 4.90 (d,  $J = 2.5$  Hz, 1H), 4.27 (q,  $J = 7.1$  Hz, 2H), 3.62 – 3.53 (m, 1H), 3.24 – 3.15 (m, 1H), 2.44 (d,  $J = 2.2$  Hz, 1H), 1.25 (t,  $J = 7.1$  Hz, 3H), 0.62 (t,  $J = 7.1$  Hz, 3H);  $^{13}\text{C NMR}$  (100 MHz,  $\text{CDCl}_3$ ):  $\delta$  (ppm) 170.33, 167.35, 143.21, 134.26, 129.25, 129.23, 127.66, 127.56, 126.16, 125.57, 122.24, 108.05, 82.70, 73.04, 63.07, 62.29, 42.57, 34.55, 14.00, 11.52; **HRMS** (ESI) for:  $\text{C}_{22}\text{H}_{22}\text{NO}_3$   $[\text{M}+\text{H}]^+$ : calcd 348.1594, found 348.1597.

**Ethyl (S)-1-ethyl-2-oxo-3-((R)-1-phenylprop-2-yn-1-yl)indoline-3-carboxylate ((S,R)-3g)**

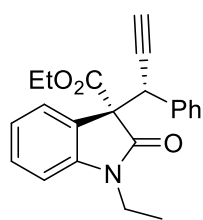

White solid, 43% yield,  $[\alpha]_D^{23} = 1.341$  ( $c = 1.00$  in  $\text{CH}_2\text{Cl}_2$ ); 94% ee, determined by HPLC analysis (Chiralpak AD column, hexane/*i*-PrOH, 70:30 v/v, flow rate 1 mL/min,  $\lambda = 254$  nm, 25 °C),  $t_R$  (major) = 6.38 min,  $t_R$  (minor) = 11.85 min;  $^1\text{H NMR}$  (400 MHz,  $\text{CDCl}_3$ ):  $\delta$  (ppm) 7.29 – 7.22 (m, 1H), 7.20 – 7.07 (m, 6H), 7.02 (t,  $J = 7.5$  Hz, 1H), 6.65 (d,  $J = 7.8$  Hz, 1H), 4.87 – 4.80 (m, 1H), 4.23 (q,  $J = 7.1$  Hz, 2H), 3.83 – 3.74 (m, 1H), 3.45 – 3.36 (m, 1H), 2.34 (d,  $J = 3.7$  Hz, 1H), 1.23 (t,  $J = 7.1$  Hz, 3H), 0.93 (t,  $J = 7.2$  Hz, 3H);  $^{13}\text{C NMR}$  (100 MHz,  $\text{CDCl}_3$ ):  $\delta$  (ppm) 170.65, 167.71, 143.28, 134.17, 129.45, 129.35, 127.77, 127.67, 125.32, 125.25, 121.89, 108.10, 80.88, 73.23, 62.92, 62.24, 42.88, 34.58, 13.92, 11.81; **HRMS** (ESI) for:  $\text{C}_{22}\text{H}_{21}\text{NO}_3\text{Na}$   $[\text{M}+\text{Na}]^+$ : calcd 370.1414, found 370.1416.

**Ethyl (R)-1-allyl-2-oxo-3-((R)-1-phenylprop-2-yn-1-yl)indoline-3-carboxylate ((R,R)-3h)**

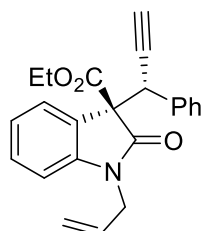

White solid, 43% yield,  $[\alpha]_D^{23} = 1.993$  ( $c = 1.00$  in  $\text{CH}_2\text{Cl}_2$ ); 92% ee, determined by HPLC analysis (Chiralpak AD column, hexane/*i*-PrOH, 70:30 v/v, flow rate 1 mL/min,  $\lambda = 254$  nm, 25 °C),  $t_R$  (major) = 4.86 min,  $t_R$  (minor) = 5.55 min;  $^1\text{H NMR}$  (400 MHz,  $\text{CDCl}_3$ ):  $\delta$  (ppm) 7.89 (d,  $J = 7.4$  Hz, 1H), 7.32 – 6.89 (m, 7H), 6.54 (d,  $J = 7.9$  Hz, 1H), 5.22 – 5.06 (m, 1H), 4.99 – 4.82 (m, 2H), 4.57 (d,  $J = 17.5$  Hz, 1H), 4.27 (q,  $J = 7.1$  Hz, 2H), 4.18 – 4.07 (m, 1H), 3.85 – 3.78 (m, 1H), 2.45 (d,  $J = 3.8$  Hz, 1H), 1.25 (t,  $J = 7.1$  Hz, 3H);  $^{13}\text{C NMR}$  (100 MHz,  $\text{CDCl}_3$ ):  $\delta$  (ppm) 170.50, 167.25, 143.32, 134.30, 130.38, 129.27, 129.19, 127.70, 127.67, 125.96, 125.32, 122.41, 117.13, 108.97, 82.67, 73.07, 63.26, 62.35, 42.43, 42.23, 13.97; **HRMS** (ESI) for:  $\text{C}_{23}\text{H}_{22}\text{NO}_3$   $[\text{M}+\text{H}]^+$ : calcd 360.1594, found 360.1596.

**Ethyl (S)-1-allyl-2-oxo-3-((R)-1-phenylprop-2-yn-1-yl)indoline-3-carboxylate ((S,R)-3h)**

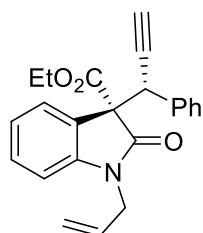

White solid, 46% yield,  $[\alpha]_D^{23} = 3.416$  ( $c = 1.00$  in  $\text{CH}_2\text{Cl}_2$ ); 91% ee, determined by HPLC analysis (Chiralpak AD column, hexane/*i*-PrOH, 70:30 v/v, flow rate 1 mL/min,  $\lambda = 254$  nm, 25 °C),  $t_R$  (major) = 6.35 min,  $t_R$  (minor) = 9.54 min;  $^1\text{H NMR}$  (400 MHz,



CDCl<sub>3</sub>):  $\delta$  (ppm) 7.37 – 6.93 (m, 8H), 6.61 (d,  $J$  = 7.8 Hz, 1H), 5.45 (m, 1H), 5.01 (d,  $J$  = 10.3 Hz, 1H), 4.92 – 4.76 (m, 2H), 4.44 – 4.17 (m, 3H), 4.05 – 3.99 (m, 1H), 2.36 (d,  $J$  = 2.6 Hz, 1H), 1.23 (t,  $J$  = 7.1 Hz, 3H); <sup>13</sup>C NMR (100 MHz, CDCl<sub>3</sub>):  $\delta$  (ppm) 170.77, 167.71, 143.35, 134.18, 130.70, 129.49, 129.32, 127.80, 127.74, 125.09, 124.95, 122.10, 117.33, 109.04, 80.98, 73.26, 63.13, 62.32, 42.74, 42.25, 13.92; **HRMS** (ESI) for: C<sub>23</sub>H<sub>21</sub>NO<sub>3</sub>Na [M+Na]<sup>+</sup>: calcd 382.1414, found 382.1396.

**Ethyl (R)-3-((R)-1-(4-bromophenyl)prop-2-yn-1-yl)-1-methyl-2-oxindoline-3-carboxylate ((R,R)-3i)**

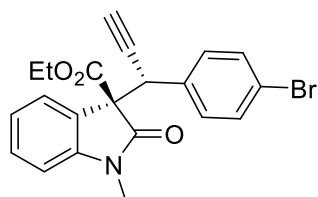

White solid, 40% yield,  $[\alpha]_D^{23}$  = 0.741 ( $c$  = 1.00 in CH<sub>2</sub>Cl<sub>2</sub>); 91% ee, determined by HPLC analysis (Chiralpak AD column, hexane/*i*-PrOH, 70:30 v/v, flow rate 1 mL/min,  $\lambda$  = 254 nm, 25 °C),  $t_R$  (major) = 6.03 min,  $t_R$  (minor) = 7.03 min; <sup>1</sup>H NMR (400 MHz, CDCl<sub>3</sub>):  $\delta$  (ppm) 7.81 (d,  $J$  = 7.5 Hz, 1H), 7.35 – 7.24 (m, 1H), 7.19 – 7.10 (m, 3H), 6.89 – 6.81 (m, 2H), 6.58 (d,  $J$  = 7.8 Hz, 1H), 4.91 – 4.83 (m, 1H), 4.27 (q,  $J$  = 7.1 Hz, 2H), 2.83 (s, 3H), 2.46 (d,  $J$  = 3.5 Hz, 1H), 1.26 (t,  $J$  = 7.1 Hz, 3H); <sup>13</sup>C NMR (100 MHz, CDCl<sub>3</sub>):  $\delta$  (ppm) 170.66, 166.97, 143.86, 133.24, 130.68, 130.55, 129.50, 125.87, 124.93, 122.61, 121.88, 108.10, 81.85, 73.53, 63.22, 62.44, 42.10, 26.16, 13.98; **HRMS** (ESI) for: C<sub>21</sub>H<sub>19</sub>BrNO<sub>3</sub> [M+H]<sup>+</sup>: calcd 412.0543, found 412.0550.

**Ethyl (S)-3-((R)-1-(4-bromophenyl)prop-2-yn-1-yl)-1-methyl-2-oxindoline-3-carboxylate ((S,R)-3i)**

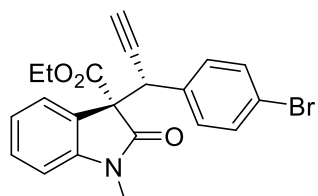

White solid, 56% yield,  $[\alpha]_D^{23}$  = 0.997 ( $c$  = 1.00 in CH<sub>2</sub>Cl<sub>2</sub>); 96% ee, determined by HPLC analysis (Chiralpak AD column, hexane/*i*-PrOH, 70:30 v/v, flow rate 1 mL/min,  $\lambda$  = 254 nm, 25 °C),  $t_R$  (major) = 11.46 min,  $t_R$  (minor) = 12.54 min; <sup>1</sup>H NMR (400 MHz, CDCl<sub>3</sub>):  $\delta$  (ppm) 7.34 – 7.22 (m, 3H), 7.09 – 7.01 (m, 4H), 6.67 (d,  $J$  = 7.8 Hz, 1H), 4.79 (d,  $J$  = 2.4 Hz, 1H), 4.28 – 4.18 (m, 2H), 3.04 (s, 3H), 2.33 (d,  $J$  = 2.0 Hz, 1H), 1.22 (t,  $J$  = 7.1 Hz, 3H); <sup>13</sup>C NMR (100 MHz, CDCl<sub>3</sub>):  $\delta$  (ppm) 170.95, 167.44, 144.13, 133.44, 131.12, 130.76, 129.63, 124.96, 124.77, 122.27, 122.07, 108.19, 80.27, 73.47, 63.01, 62.41, 42.42, 26.24, 13.95; **HRMS** (ESI) for: C<sub>21</sub>H<sub>19</sub>BrNO<sub>3</sub> [M+H]<sup>+</sup>: calcd 412.0543, found 412.0550.

**Ethyl (R)-3-((R)-1-(3-bromophenyl)prop-2-yn-1-yl)-1-methyl-2-oxindoline-3-carboxylate ((R,R)-3j)**

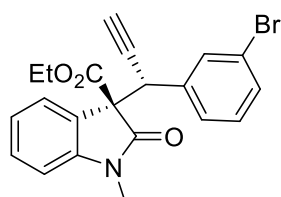

White solid, 35% yield,  $[\alpha]_D^{23}$  = 3.836 ( $c$  = 1.00 in CH<sub>2</sub>Cl<sub>2</sub>); 87% ee, determined by HPLC analysis (Chiralpak AD column, hexane/*i*-PrOH, 70:30 v/v, flow rate 1 mL/min,  $\lambda$  = 254 nm, 25 °C),  $t_R$  (major) = 5.11 min,  $t_R$  (minor) = 6.14 min; <sup>1</sup>H NMR (400 MHz, CDCl<sub>3</sub>):  $\delta$  (ppm) 7.81 (d,  $J$  = 7.5 Hz, 1H), 7.31 (t,  $J$  = 7.8 Hz, 1H), 7.25 – 7.12 (m, 2H), 7.05 (d,  $J$  = 1.8 Hz, 1H), 6.97 – 6.87 (m, 2H), 6.57 (d,  $J$  = 7.8 Hz, 1H), 4.85 (t,  $J$  = 2.0 Hz, 1H), 4.28

(q,  $J = 7.1$  Hz, 2H), 2.83 (s, 3H), 2.47 (d,  $J = 2.1$  Hz, 1H), 1.27 (t,  $J = 7.1$  Hz, 3H);  $^{13}\text{C}$  NMR (100 MHz,  $\text{CDCl}_3$ ):  $\delta$  (ppm) 170.64, 166.93, 143.86, 136.37, 131.90, 130.80, 129.59, 128.86, 127.76, 125.89, 124.90, 122.67, 121.35, 108.01, 81.62, 73.76, 63.36, 62.47, 42.40, 26.14, 14.02; **HRMS** (ESI) for:  $\text{C}_{21}\text{H}_{19}\text{BrNO}_3$   $[\text{M}+\text{H}]^+$ : calcd 412.0543, found 412.0552.

**Ethyl (S)-3-((R)-1-(3-bromophenyl)prop-2-yn-1-yl)-1-methyl-2-oxoindoline-3-carboxylate ((S,R)-3j)**

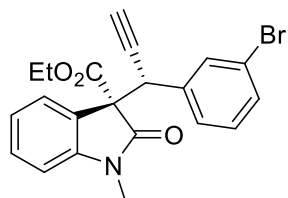

White solid, 46% yield,  $[\alpha]_{\text{D}}^{23} = 2.632$  ( $c = 1.00$  in  $\text{CH}_2\text{Cl}_2$ ); 96% ee, determined by HPLC analysis (Chiralpak AD column, hexane/*i*-PrOH, 70:30 v/v, flow rate 1 mL/min,  $\lambda = 254$  nm, 25 °C),  $t_{\text{R}}$  (major) = 9.43 min,  $t_{\text{R}}$  (minor) = 14.96 min;  $^1\text{H}$  NMR (400 MHz,  $\text{CDCl}_3$ ):  $\delta$  (ppm) 7.37 – 7.22 (m, 3H), 7.15 – 7.12 (m, 1H), 7.08 – 6.96 (m, 3H), 6.67 (d,  $J = 7.8$  Hz, 1H), 4.81 (d,  $J = 2.5$  Hz, 1H), 4.29 – 4.18 (m, 2H), 3.05 (s, 3H), 2.33 (d,  $J = 3.7$  Hz, 1H), 1.23 (t,  $J = 7.1$  Hz, 3H);  $^{13}\text{C}$  NMR (100 MHz,  $\text{CDCl}_3$ ):  $\delta$  (ppm) 170.85, 167.30, 144.12, 136.63, 132.32, 130.96, 129.64, 129.10, 128.10, 125.10, 124.65, 122.24, 121.56, 108.11, 79.94, 73.66, 63.04, 62.42, 42.60, 26.22, 13.94; **HRMS** (ESI) for:  $\text{C}_{21}\text{H}_{19}\text{BrNO}_3$   $[\text{M}+\text{H}]^+$ : calcd 412.0543, found 412.0552.

**Ethyl (R)-3-((R)-1-(4-methoxyphenyl)prop-2-yn-1-yl)-1-methyl-2-oxoindoline-3-carboxylate ((R,R)-3k)**

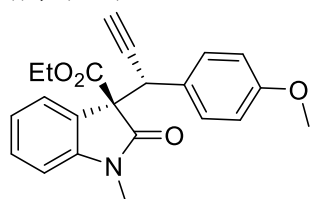

White solid, 41% yield,  $[\alpha]_{\text{D}}^{23} = 0.881$  ( $c = 1.00$  in  $\text{CH}_2\text{Cl}_2$ ); 82% ee, determined by HPLC analysis (Chiralpak AD column, hexane/*i*-PrOH, 70:30 v/v, flow rate 1 mL/min,  $\lambda = 254$  nm, 25 °C),  $t_{\text{R}}$  (major) = 8.23 min,  $t_{\text{R}}$  (minor) = 9.55 min;  $^1\text{H}$  NMR (400 MHz,  $\text{CDCl}_3$ ):  $\delta$  (ppm) 7.83 (d,  $J = 7.4$  Hz, 1H), 7.35 – 7.22 (m, 1H), 7.14 (t,  $J = 7.6$  Hz, 1H), 6.87 – 6.85 (m, 2H), 6.56 – 6.54 (m, 3H), 4.86 (t,  $J = 2.0$  Hz, 1H), 4.27 (q,  $J = 7.1$  Hz, 2H), 3.68 (s, 3H), 2.82 (s, 3H), 2.44 (d,  $J = 4.1$  Hz, 1H), 1.27 (t,  $J = 7.1$  Hz, 3H);  $^{13}\text{C}$  NMR (100 MHz,  $\text{CDCl}_3$ ):  $\delta$  (ppm) 170.89, 167.22, 158.94, 143.95, 130.02, 129.23, 126.10, 125.93, 125.37, 122.41, 112.78, 107.90, 82.67, 73.04, 63.55, 62.28, 55.08, 42.08, 26.12, 14.02; **HRMS** (ESI) for:  $\text{C}_{22}\text{H}_{22}\text{NO}_4$   $[\text{M}+\text{H}]^+$ : calcd 364.1543, found 364.1551.

**Ethyl (S)-3-((R)-1-(4-methoxyphenyl)prop-2-yn-1-yl)-1-methyl-2-oxoindoline-3-carboxylate ((S,R)-3k)**

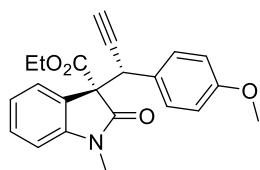

White solid, 50% yield,  $[\alpha]_{\text{D}}^{23} = 0.997$  ( $c = 1.00$  in  $\text{CH}_2\text{Cl}_2$ ); 74% ee, determined by HPLC analysis (Chiralpak AD column, hexane/*i*-PrOH, 70:30 v/v, flow rate 1 mL/min,  $\lambda = 254$  nm, 25 °C),  $t_{\text{R}}$  (major) = 13.61 min,  $t_{\text{R}}$  (minor) = 23.42 min;  $^1\text{H}$  NMR (400 MHz,  $\text{CDCl}_3$ ):  $\delta$  (ppm) 7.31 – 7.22 (m, 1H), 7.08 (m, 3H), 7.01 (t,  $J = 7.5$  Hz, 1H), 6.69 – 6.62 (m, 3H), 4.80 (t,  $J = 2.1$  Hz, 1H), 4.26 – 4.19 (m, 2H), 3.73 (d,  $J = 1.5$  Hz, 3H), 3.03 (d,  $J = 1.6$  Hz, 3H), 2.30 (d,  $J = 4.4$  Hz, 1H), 1.22 (t,  $J = 7.2$  Hz, 3H);  $^{13}\text{C}$  NMR (100 MHz,  $\text{CDCl}_3$ ):  $\delta$  (ppm) 171.20, 167.57,

159.11, 144.17, 130.46, 129.31, 126.28, 125.21, 125.12, 122.06, 112.97, 107.95, 81.00, 72.94, 63.40, 62.23, 55.15, 42.39, 26.21, 13.96; **HRMS** (ESI) for: C<sub>22</sub>H<sub>21</sub>NO<sub>4</sub>Na [M+Na]<sup>+</sup>: calcd 386.1363, found 386.1370.

**Ethyl (R)-1-methyl-3-((R)-1-(naphthalen-2-yl)prop-2-yn-1-yl)-2-oxindoline-3-carboxylate ((R,R)-3I)**

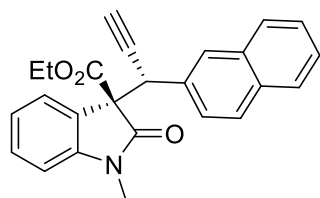

White solid, 39% yield,  $[\alpha]_D^{23} = 0.718$  ( $c = 1.00$  in CH<sub>2</sub>Cl<sub>2</sub>); 88% ee, determined by HPLC analysis (Chiralpak AD column, hexane/i-PrOH, 70:30 v/v, flow rate 1 mL/min,  $\lambda = 254$  nm, 25 °C),  $t_R$  (major) = 7.05 min,  $t_R$  (minor) = 9.29 min; **<sup>1</sup>H NMR** (400 MHz, CDCl<sub>3</sub>):  $\delta$  (ppm) 7.91 (d,  $J = 7.4$  Hz, 1H), 7.71 – 7.56 (m, 2H), 7.52 – 7.32 (m, 4H), 7.24 – 7.17 (m, 2H), 7.05 – 7.02 (m, 1H), 6.41 (d,  $J = 7.7$  Hz, 1H), 5.10 – 5.06 (m, 1H), 4.30 (q,  $J = 7.1$  Hz, 2H), 2.66 (s, 3H), 2.50 (d,  $J = 3.5$  Hz, 1H), 1.28 (t,  $J = 7.8$  Hz, 3H); **<sup>13</sup>C NMR** (100 MHz, CDCl<sub>3</sub>):  $\delta$  (ppm) 170.80, 167.18, 143.89, 132.59, 132.57, 131.54, 129.31, 128.39, 127.91, 127.26, 126.83, 126.53, 125.98, 125.94, 125.74, 125.28, 122.47, 107.92, 82.40, 73.41, 63.54, 62.36, 42.87, 26.02, 14.02; **HRMS** (ESI) for: C<sub>25</sub>H<sub>22</sub>NO<sub>3</sub> [M+H]<sup>+</sup>: calcd 348.1594, found 348.1600.

**Ethyl (S)-1-methyl-3-((R)-1-(naphthalen-2-yl)prop-2-yn-1-yl)-2-oxindoline-3-carboxylate ((S,R)-3I)**

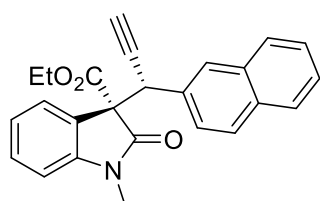

White solid, 52% yield,  $[\alpha]_D^{23} = 1.024$  ( $c = 1.00$  in CH<sub>2</sub>Cl<sub>2</sub>); 96% ee, determined by HPLC analysis (Chiralpak AD column, hexane/i-PrOH, 70:30 v/v, flow rate 1 mL/min,  $\lambda = 254$  nm, 25 °C),  $t_R$  (major) = 9.91 min,  $t_R$  (minor) = 19.58 min; **<sup>1</sup>H NMR** (400 MHz, CDCl<sub>3</sub>):  $\delta$  (ppm) 7.81 – 7.58 (m, 4H), 7.49 – 7.38 (m, 2H), 7.34 – 7.19 (m, 2H), 7.12 – 6.97 (m, 2H), 6.58 (d,  $J = 7.8$  Hz, 1H), 5.06 – 5.01 (m, 1H), 4.24 (q,  $J = 7.1$  Hz, 2H), 2.99 (s, 3H), 2.36 (d,  $J = 3.8$  Hz, 1H), 1.22 (t,  $J = 7.1$  Hz, 3H); **<sup>13</sup>C NMR** (100 MHz, CDCl<sub>3</sub>):  $\delta$  (ppm) 171.18, 167.55, 144.17, 132.75, 132.71, 131.82, 129.41, 128.81, 127.97, 127.41, 127.14, 127.06, 126.12, 125.96, 125.35, 125.01, 122.08, 108.01, 80.77, 73.32, 63.36, 62.34, 43.20, 26.22, 13.96; **HRMS** (ESI) for: C<sub>25</sub>H<sub>22</sub>NO<sub>3</sub> [M+H]<sup>+</sup>: calcd 348.1594, found 348.1600.

**Ethyl (R)-3-((S)-1-(6-bromobenzo[d][1,3]dioxol-5-yl)prop-2-yn-1-yl)-1-methyl-2-oxindoline-3-carboxylate ((R,S)-3m)**

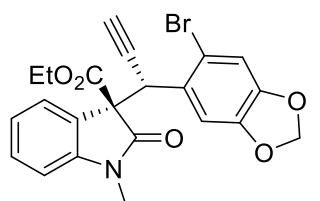

White solid, 37% yield,  $[\alpha]_D^{23} = -6.717$  ( $c = 1.00$  in CH<sub>2</sub>Cl<sub>2</sub>); 91% ee, determined by HPLC analysis (Chiralpak AD column, hexane/i-PrOH, 70:30 v/v, flow rate 1 mL/min,  $\lambda = 254$  nm, 25 °C),  $t_R$  (minor) = 6.68 min,  $t_R$  (major) = 8.26 min; **<sup>1</sup>H NMR** (400 MHz, CDCl<sub>3</sub>):  $\delta$  (ppm) 7.67 (d,  $J = 7.5$  Hz, 1H), 7.40 (t,  $J = 7.8$  Hz, 1H), 7.15 (t,  $J = 7.6$  Hz, 1H), 6.93 (d,  $J = 1.3$  Hz, 1H), 6.77 (d,  $J = 7.8$  Hz, 1H), 6.44 (d,  $J = 1.3$  Hz, 1H), 5.90 – 5.82 (m, 2H), 5.43 (d,  $J = 3.8$  Hz, 1H), 4.22 – 4.16 (m, 2H), 3.01 (s, 3H), 2.35 (d,  $J =$

3.7 Hz, 1H), 1.19 (t,  $J = 7.1$  Hz, 3H);  $^{13}\text{C}$  NMR (100 MHz,  $\text{CDCl}_3$ ):  $\delta$  (ppm) 170.85, 167.22, 147.73, 146.86, 144.57, 129.84, 128.45, 125.75, 125.54, 122.74, 115.78, 112.42, 109.54, 108.15, 101.70, 81.99, 72.80, 62.35, 62.14, 40.34, 26.40, 13.90; **HRMS** (ESI) for:  $\text{C}_{22}\text{H}_{19}\text{BrNO}_5$   $[\text{M}+\text{H}]^+$ : calcd 456.0441, found 456.0442.

**Ethyl (S)-3-((S)-1-(6-bromobenzo[d][1,3]dioxol-5-yl)prop-2-yn-1-yl)-1-methyl-2-oxindoline-3-carboxylate ((S,S)-3m)**

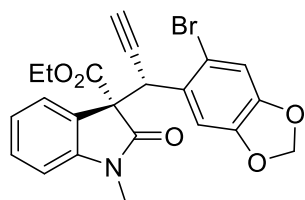

White solid, 38% yield,  $[\alpha]_{\text{D}}^{23} = 3.518$  ( $c = 1.00$  in  $\text{CH}_2\text{Cl}_2$ ); 85% ee, determined by HPLC analysis (Chiralpak AD column, hexane/*i*-PrOH, 70:30 v/v, flow rate 1 mL/min,  $\lambda = 254$  nm, 25 °C),  $t_{\text{R}}$  (minor) = 9.36 min,  $t_{\text{R}}$  (major) = 16.27 min;  $^1\text{H}$  NMR (400 MHz,  $\text{CDCl}_3$ ):  $\delta$  (ppm) 7.53 (d,  $J = 7.5$  Hz, 1H), 7.27 – 7.20 (m, 1H), 7.09 (d,  $J = 1.3$  Hz, 1H), 7.00 (t,  $J = 7.6$  Hz, 1H), 6.75 (d,  $J = 1.3$  Hz, 1H), 6.65 (d,  $J = 7.8$  Hz, 1H), 5.96 – 5.87 (m, 2H), 5.39 (t,  $J = 2.0$  Hz, 1H), 4.24 (q,  $J = 7.1$  Hz, 2H), 3.17 (s, 3H), 2.36 (d,  $J = 4.0$  Hz, 1H), 1.22 (t,  $J = 7.8$  Hz, 3H);  $^{13}\text{C}$  NMR (100 MHz,  $\text{CDCl}_3$ ):  $\delta$  (ppm) 171.65, 167.68, 147.96, 147.42, 143.68, 129.69, 128.13, 125.72, 124.51, 122.13, 115.55, 112.20, 109.83, 107.88, 101.96, 80.90, 73.16, 62.55, 62.34, 40.65, 26.46, 13.99; **HRMS** (ESI) for:  $\text{C}_{22}\text{H}_{19}\text{BrNO}_5$   $[\text{M}+\text{H}]^+$ : calcd 456.0441, found 456.0442.

**Ethyl (R)-3-((S)-but-3-yn-2-yl)-1-methyl-2-oxindoline-3-carboxylate ((R,S)-3n)**

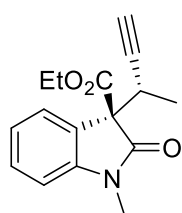

White solid, 43% yield,  $[\alpha]_{\text{D}}^{23} = 0.708$  ( $c = 1.00$  in  $\text{CH}_2\text{Cl}_2$ ); 98% ee, determined by HPLC analysis (Chiralpak OJ column, hexane/*i*-PrOH, 70:30 v/v, flow rate 1 mL/min,  $\lambda = 254$  nm, 25 °C),  $t_{\text{R}}$  (major) = 8.13 min,  $t_{\text{R}}$  (minor) = 9.06 min;  $^1\text{H}$  NMR (400 MHz,  $\text{CDCl}_3$ ):  $\delta$  (ppm) 7.58 (d,  $J = 7.5$  Hz, 1H), 7.36 (t,  $J = 7.7$  Hz, 1H), 7.11 (t,  $J = 7.6$  Hz, 1H), 6.86 (d,  $J = 7.8$  Hz, 1H), 4.30 – 4.12 (m, 2H), 3.71 – 3.65 (m, 1H), 3.24 (s, 3H), 2.09 (d,  $J = 3.7$  Hz, 1H), 1.22 (t,  $J = 7.1$  Hz, 3H), 1.07 (d,  $J = 5.7$  Hz, 3H);  $^{13}\text{C}$  NMR (100 MHz,  $\text{CDCl}_3$ ):  $\delta$  (ppm) 171.77, 167.62, 144.19, 129.23, 126.19, 124.79, 122.83, 108.06, 83.97, 70.75, 62.17, 61.71, 31.70, 26.45, 15.56, 13.93; **HRMS** (ESI) for:  $\text{C}_{16}\text{H}_{18}\text{NO}_3$   $[\text{M}+\text{H}]^+$ : calcd 272.1281, found 272.1283.

**Ethyl (S)-3-((S)-but-3-yn-2-yl)-1-methyl-2-oxindoline-3-carboxylate ((S,S)-3n)**

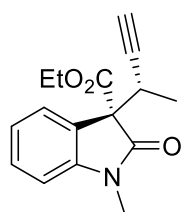

White solid, 56% yield,  $[\alpha]_{\text{D}}^{23} = 0.351$  ( $c = 1.00$  in  $\text{CH}_2\text{Cl}_2$ ); 96% ee, determined by HPLC analysis (Chiralpak OJ column, hexane/*i*-PrOH, 70:30 v/v, flow rate 1 mL/min,  $\lambda = 254$  nm, 25 °C),  $t_{\text{R}}$  (minor) = 10.04 min,  $t_{\text{R}}$  (major) = 11.31 min;  $^1\text{H}$  NMR (400 MHz,  $\text{CDCl}_3$ ):  $\delta$  (ppm) 7.38 – 7.32 (m, 2H), 7.09 (t,  $J = 7.6$  Hz, 1H), 6.87 (d,  $J = 7.8$  Hz, 1H), 4.20 (q,  $J = 7.1$  Hz, 2H), 3.65 – 3.59 (m, 1H), 3.25 (s, 3H), 2.03 (d,  $J = 2.9$  Hz, 1H), 1.22 – 1.19 (m, 6H);  $^{13}\text{C}$  NMR (100 MHz,  $\text{CDCl}_3$ ):  $\delta$  (ppm) 171.99, 167.73, 144.50, 129.32, 125.76, 124.39, 122.57, 108.18, 82.99, 70.57, 62.09, 61.88, 31.62, 26.37, 15.82, 13.92; **HRMS** (ESI) for:  $\text{C}_{16}\text{H}_{17}\text{NO}_3\text{Na}$   $[\text{M}+\text{Na}]^+$ : calcd 294.1101, found 294.1105.

**Ethyl (R)-1-methyl-2-oxo-3-((S)-5-phenylpent-1-yn-3-yl)indoline-3-carboxylate ((R,S)-3o)**

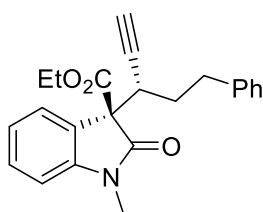

White solid, 39% yield,  $[\alpha]_D^{23} = 0.906$  ( $c = 1.00$  in  $\text{CH}_2\text{Cl}_2$ ); 94% ee, determined by HPLC analysis (Chiralpak AD column, hexane/*i*-PrOH, 70:30 v/v, flow rate 1 mL/min,  $\lambda = 254$  nm, 25 °C),  $t_R$  (minor) = 6.61 min,  $t_R$  (major) = 7.22 min;  $^1\text{H NMR}$  (400 MHz,  $\text{CDCl}_3$ ):  $\delta$  (ppm) 7.57 (d,  $J = 7.5$  Hz, 1H), 7.39 – 7.01 (m, 7H), 6.83 (d,  $J = 7.7$  Hz, 1H), 4.27 – 4.10 (m, 2H), 3.66 – 3.52 (m, 1H), 3.21 (s, 3H), 2.95 – 2.88 (m, 1H), 2.67 – 2.60 (m, 1H), 2.17 (d,  $J = 4.0$  Hz, 1H), 1.68 – 1.58 (m, 2H), 1.19 (t,  $J = 7.2$  Hz, 3H);  $^{13}\text{C NMR}$  (100 MHz,  $\text{CDCl}_3$ ):  $\delta$  (ppm) 171.71, 167.53, 144.06, 141.17, 129.22, 128.51, 128.31, 126.46, 125.93, 124.76, 122.85, 108.16, 82.39, 72.30, 62.23, 61.71, 37.31, 33.73, 31.09, 26.52, 13.91; **HRMS** (ESI) for:  $\text{C}_{23}\text{H}_{24}\text{NO}_3$   $[\text{M}+\text{H}]^+$ : calcd 362.1751, found 362.1752.

**Ethyl (S)-1-methyl-2-oxo-3-((S)-5-phenylpent-1-yn-3-yl)indoline-3-carboxylate ((S,S)-3o)**

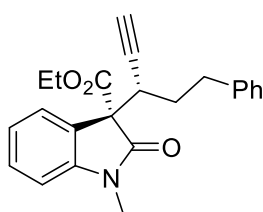

White solid, 51% yield,  $[\alpha]_D^{23} = 0.426$  ( $c = 1.00$  in  $\text{CH}_2\text{Cl}_2$ ); 94% ee, determined by HPLC analysis (Chiralpak AD column, hexane/*i*-PrOH, 70:30 v/v, flow rate 1 mL/min,  $\lambda = 254$  nm, 25 °C),  $t_R$  (minor) = 6.83 min,  $t_R$  (major) = 7.31 min;  $^1\text{H NMR}$  (400 MHz,  $\text{CDCl}_3$ ):  $\delta$  (ppm) 7.41 – 6.99 (m, 8H), 6.84 (d,  $J = 7.8$  Hz, 1H), 4.17 (q,  $J = 7.1$  Hz, 2H), 3.52 – 3.40 (m, 1H), 3.23 (s, 3H), 2.98 – 2.91 (m, 1H), 2.69 – 2.61 (m, 1H), 2.13 (d,  $J = 3.9$  Hz, 1H), 1.89 – 1.51 (m, 2H), 1.17 (t,  $J = 7.1$  Hz, 3H);  $^{13}\text{C NMR}$  (100 MHz,  $\text{CDCl}_3$ ):  $\delta$  (ppm) 171.99, 167.71, 144.49, 140.98, 129.35, 128.51, 128.36, 126.01, 125.73, 124.40, 122.62, 108.20, 81.57, 72.02, 62.14, 61.74, 36.88, 33.73, 31.37, 26.41, 13.89; **HRMS** (ESI) for:  $\text{C}_{23}\text{H}_{23}\text{NO}_3\text{Na}$   $[\text{M}+\text{Na}]^+$ : calcd 384.1570, found 384.1575.

**Ethyl (R)-3-((S)-1-cyclohexylprop-2-yn-1-yl)-1-methyl-2-oxoindoline-3-carboxylate ((R,S)-3p)**

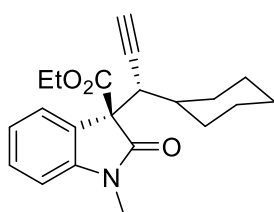

White solid, 33% yield,  $[\alpha]_D^{23} = 0.983$  ( $c = 1.00$  in  $\text{CH}_2\text{Cl}_2$ ); 71% ee, determined by HPLC analysis (Chiralpak IC column, hexane/*i*-PrOH, 70:30 v/v, flow rate 1 mL/min,  $\lambda = 254$  nm, 25 °C),  $t_R$  (major) = 8.90 min,  $t_R$  (minor) = 12.29 min;  $^1\text{H NMR}$  (400 MHz,  $\text{CDCl}_3$ ):  $\delta$  (ppm) 7.64 (d,  $J = 7.5$  Hz, 1H), 7.34 (t,  $J = 7.7$  Hz, 1H), 7.09 (t,  $J = 7.6$  Hz, 1H), 6.84 (d,  $J = 7.8$  Hz, 1H), 4.21 – 4.15 (m, 2H), 3.57 – 3.55 (m, 1H), 3.24 (s, 3H), 2.15 (d,  $J = 2.2$  Hz, 1H), 1.74 – 1.33 (m, 5H), 1.30 – 1.24 (m, 1H), 1.21 (t,  $J = 6.9$  Hz, 3H), 1.17 – 1.08 (m, 2H), 1.06 – 0.90 (m, 3H);  $^{13}\text{C NMR}$  (100 MHz,  $\text{CDCl}_3$ ):  $\delta$  (ppm) 171.77, 167.98, 143.79, 129.05, 127.49, 125.49, 122.69, 108.05, 82.09, 72.73, 62.25, 61.45, 43.22, 38.43, 32.68, 29.79, 26.56, 26.39, 26.07, 25.86, 13.88; **HRMS** (ESI) for:  $\text{C}_{21}\text{H}_{26}\text{NO}_3$   $[\text{M}+\text{H}]^+$ : calcd 340.1907, found 340.1916.

**Ethyl (S)-3-((S)-1-cyclohexylprop-2-yn-1-yl)-1-methyl-2-oxoindoline-3-carboxylate ((S,S)-3p)**

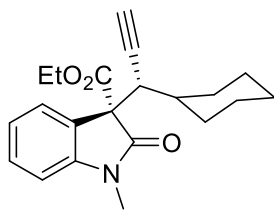

White solid, 42% yield,  $[\alpha]_D^{23} = 0.193$  ( $c = 1.00$  in  $\text{CH}_2\text{Cl}_2$ ); 58% ee, determined by HPLC analysis (Chiralpak IC column, hexane/*i*-PrOH, 70:30 v/v, flow rate 1 mL/min,  $\lambda = 254$  nm, 25 °C),  $t_R$  (major) = 33.63 min,  $t_R$  (minor) = 59.70 min;  $^1\text{H NMR}$  (400 MHz,  $\text{CDCl}_3$ ):  $\delta$  (ppm) 7.35 (t,  $J = 7.7$  Hz, 1H), 7.29 – 7.24 (m, 1H), 7.09 (t,  $J = 7.6$  Hz, 1H), 6.86 (d,  $J = 7.8$  Hz, 1H), 4.22 – 4.15 (m, 2H), 3.52 (t,  $J = 2.9$  Hz, 1H), 3.23 (s, 3H), 2.13 (d,  $J = 3.5$  Hz, 1H), 1.74 – 1.45 (m, 5H), 1.33 – 1.25 (m, 3H), 1.21 (t,  $J = 7.1$  Hz, 3H), 1.15 – 0.96 (m, 3H);  $^{13}\text{C NMR}$  (100 MHz,  $\text{CDCl}_3$ ):  $\delta$  (ppm) 172.35, 168.32, 144.28, 129.28, 125.84, 124.39, 122.57, 108.18, 80.87, 72.65, 62.20, 61.29, 43.32, 37.66, 32.92, 30.13, 26.43, 26.40, 26.00, 25.78, 13.85; **HRMS** (ESI) for:  $\text{C}_{21}\text{H}_{25}\text{NO}_3\text{Na}$   $[\text{M}+\text{Na}]^+$ : calcd 362.1727, found 362.1732.

**Ethyl (S)-6-bromo-3-((R)-1-((2S,3S,5R)-2-(hydroxymethyl)-5-(5-methyl-2,4-dioxo-3,4-dihydropyrimidin-1(2H)-yl)tetrahydrofuran-3-yl)-1H-1,2,3-triazol-4-yl)(phenyl)methyl)-1-methyl-2-oxindoline-3-carboxylate (4)**

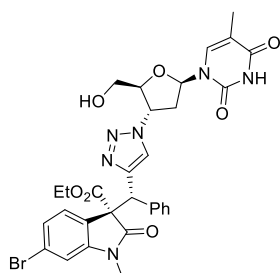

White solid, 90% yield,  $[\alpha]_D^{23} = -1.290$  ( $c = 1.00$  in  $\text{CH}_2\text{Cl}_2$ ); >95:5 d.r.;  $^1\text{H NMR}$  (400 MHz,  $\text{CDCl}_3$ ):  $\delta$  (ppm) 9.47 (s, 1H), 7.57 (d,  $J = 8.1$  Hz, 1H), 7.44 (s, 1H), 7.39 (s, 1H), 7.22 – 7.00 (m, 4H), 6.95 (d,  $J = 7.6$  Hz, 2H), 6.72 (s, 1H), 6.22 (t,  $J = 6.5$  Hz, 1H), 5.37 – 5.34 (m, 2H), 4.44 – 4.33 (m, 1H), 4.25 – 4.06 (m, 2H), 3.98 (d,  $J = 12.3$  Hz, 1H), 3.79 – 3.68 (m, 1H), 3.59 (s, 1H), 2.91 (t,  $J = 6.9$  Hz, 2H), 2.79 (s, 3H), 1.88 (s, 3H), 1.13 (t,  $J = 7.1$  Hz, 3H);  $^{13}\text{C NMR}$  (100 MHz,  $\text{CDCl}_3$ ):  $\delta$  (ppm) 171.72, 167.31, 163.90, 150.46, 147.28, 145.43, 137.80, 136.15, 129.47, 129.14, 127.75, 125.42, 125.01, 123.56, 122.69, 111.27, 111.17, 88.51, 85.15, 63.97, 62.31, 61.50, 59.11, 48.15, 37.39, 26.25, 13.80, 12.37; **HRMS** (ESI) for:  $\text{C}_{31}\text{H}_{32}\text{BrN}_6\text{O}_7$   $[\text{M}+\text{H}]^+$ : calcd 679.1510, found 679.1516.

**5. X-ray structure of (S,R)-3i and (R,S)-3m**

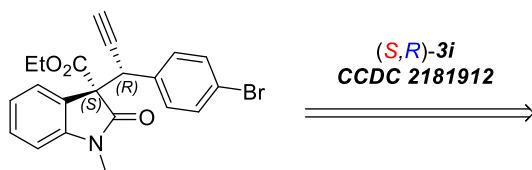

(S,R)-3i  
CCDC 2181912

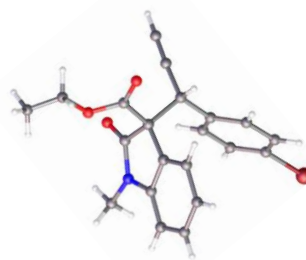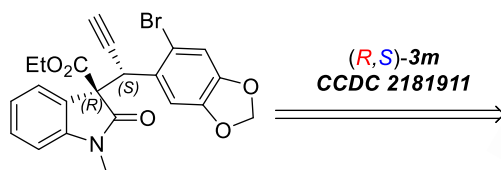

(R,S)-3m  
CCDC 2181911

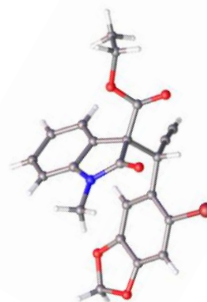

## References

- (a) J. Gao, J. R. Chen, S. W. Duan, T. R. Li, L. Q. Lu and W. J. Xiao, *Asian J. Org. Chem.*, 2014, **3**, 530-535; (b) J. G. Wang, S. Osman, X. J. Lu, J. Y. Chen and X. D. Xia, *Heterocycl. Commun.*, 2020, **26**, 168-175.
- (a) G. Hattori, K. Sakata, H. Matsuzawa, Y. Tanabe, Y. Miyake and Y. Nishibayashi, *J. Am. Chem. Soc.*, 2010, **132**, 10592-10608; (b) D. Y. Zhang, L. Shao, J. Xu and X. P. Hu, *ACS Catal.*, 2015, **5**, 5026-5030; (c) K. Zhang, L. Q. Lu, S. Yao, J. R. Chen, D. Q. Shi and W. J. Xiao, *J. Am. Chem. Soc.*, 2017, **139**, 12847-12854.

## 6. Copies of $^1\text{H}$ and $^{13}\text{C}$ NMR Spectra

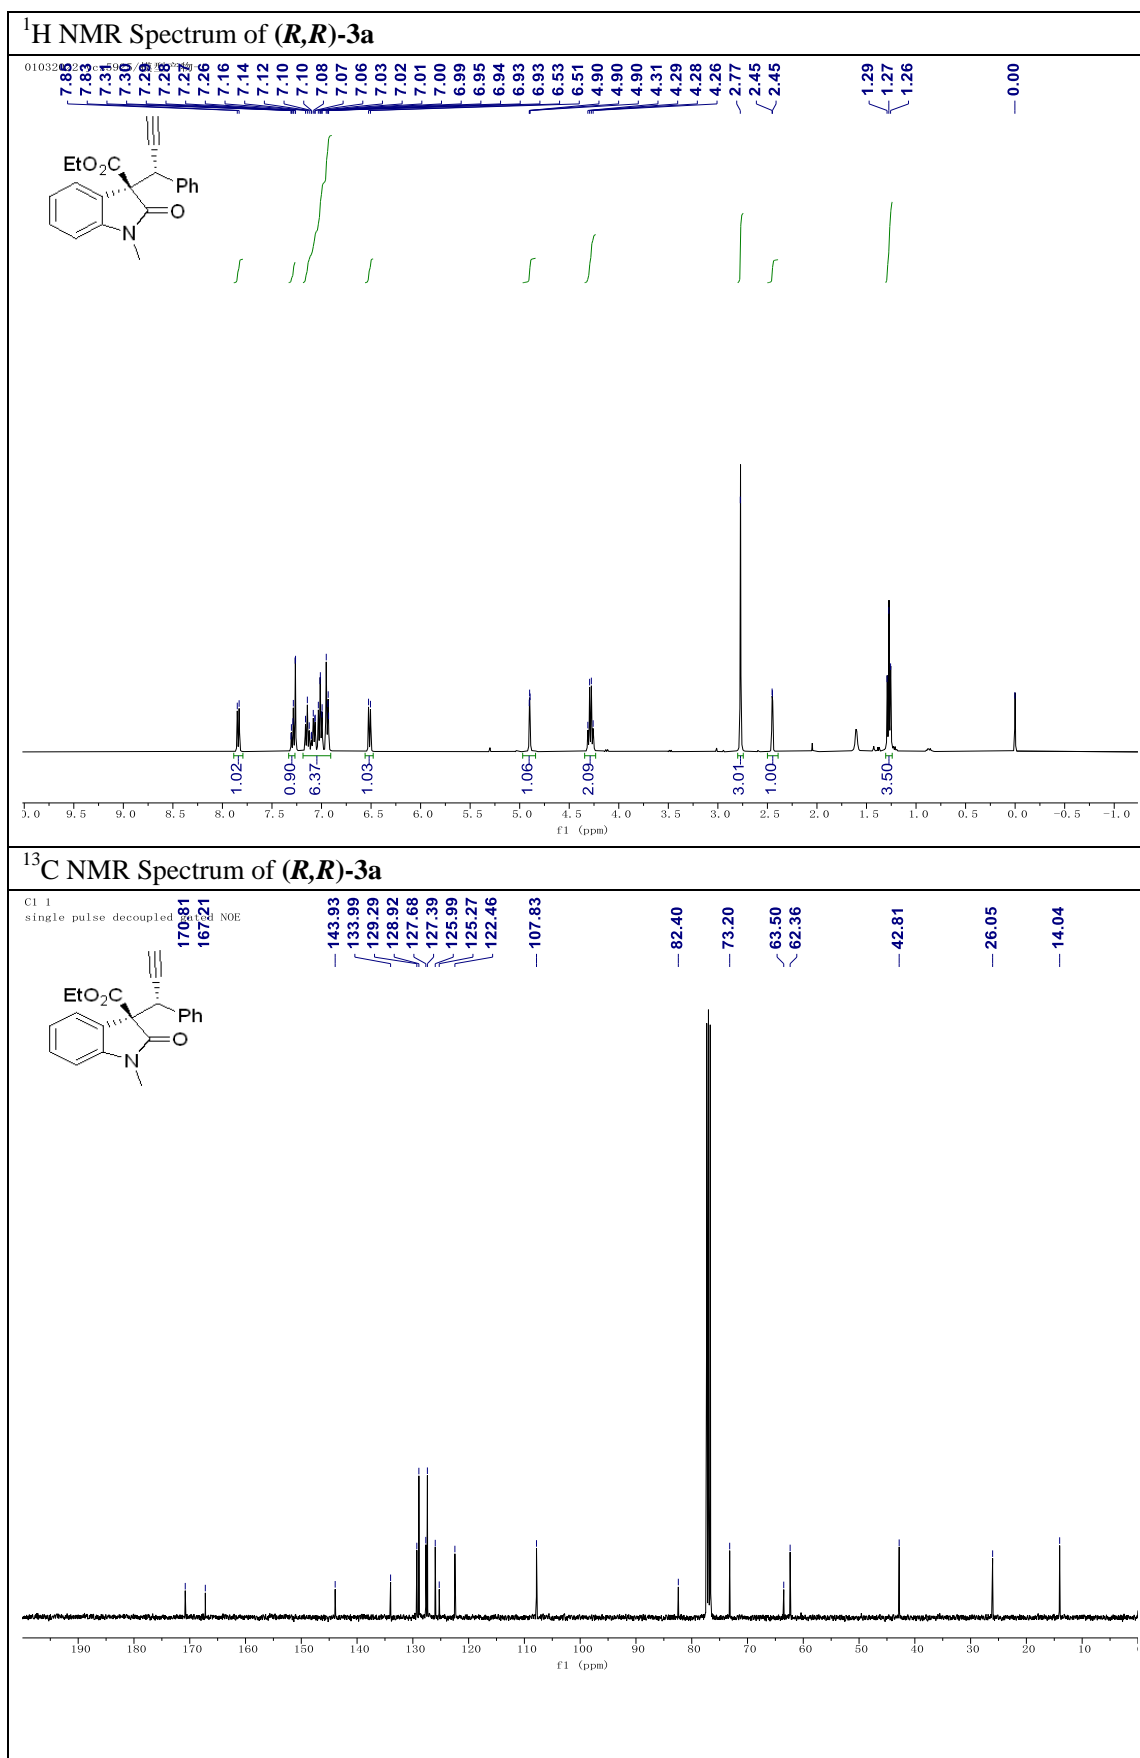



### <sup>1</sup>H NMR Spectrum of (*S,R*)-3a

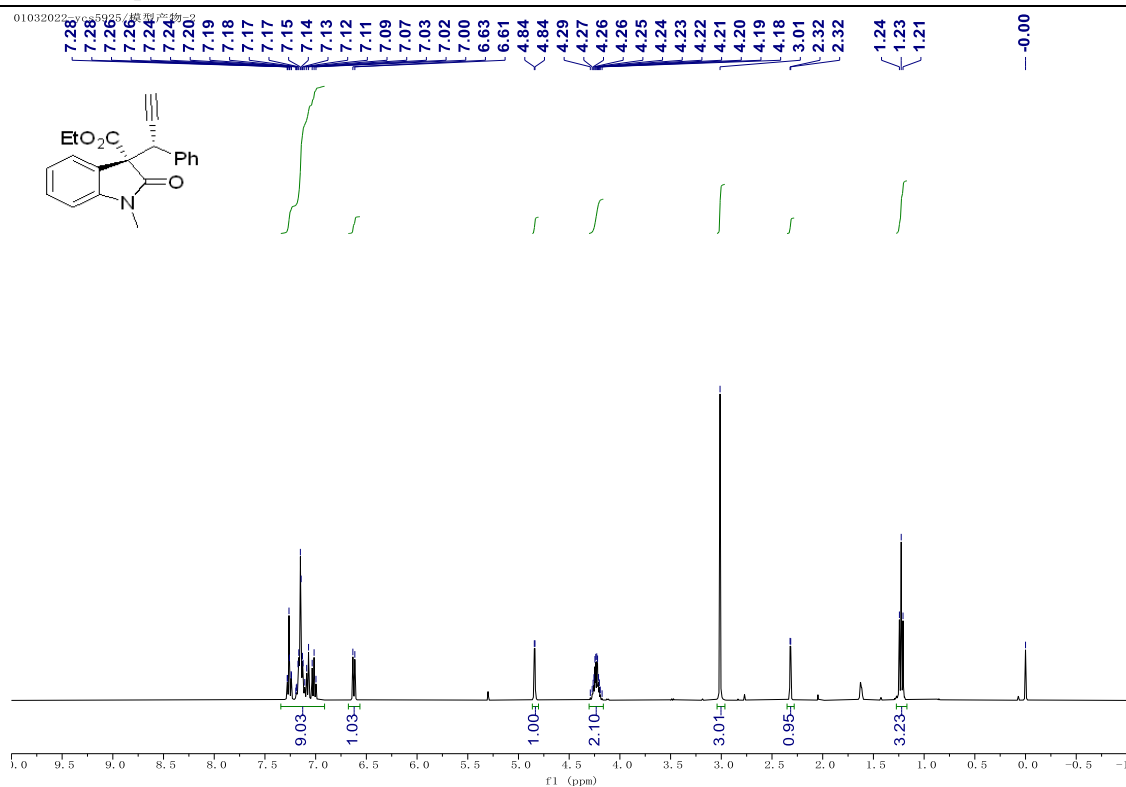

### <sup>13</sup>C NMR Spectrum of (*S,R*)-3a

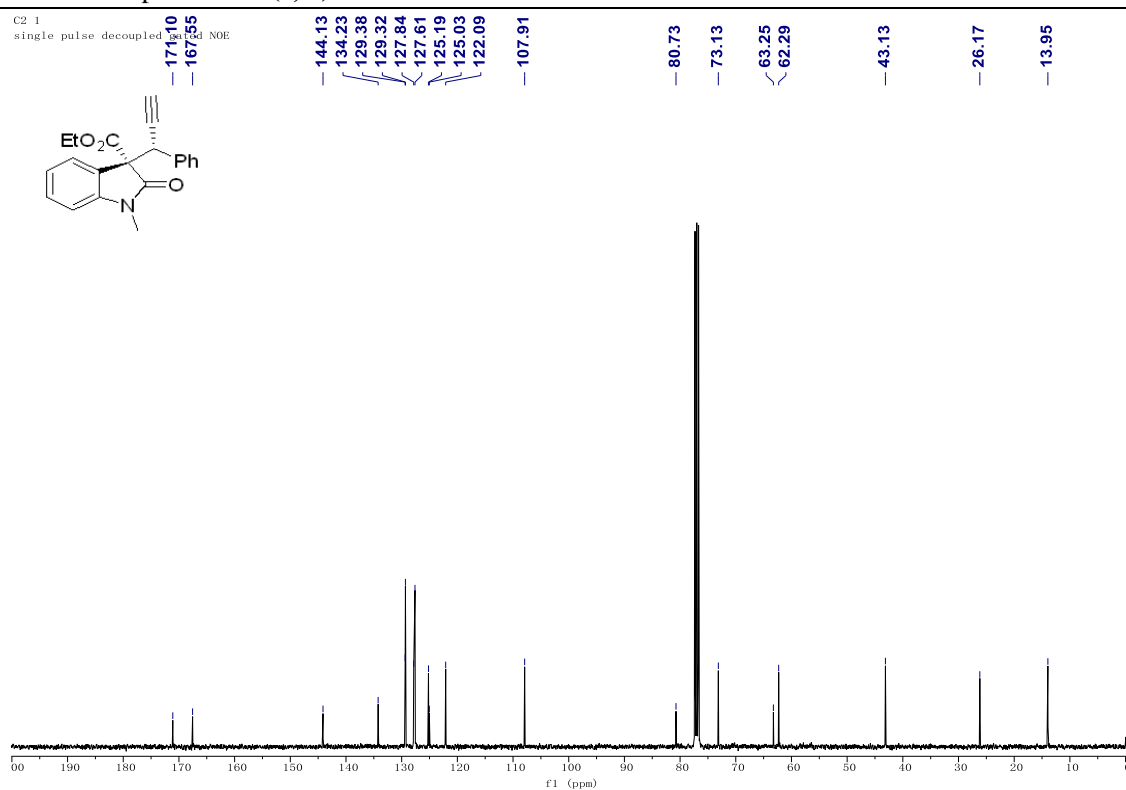

### <sup>1</sup>H NMR Spectrum of (*R,R*)-3b

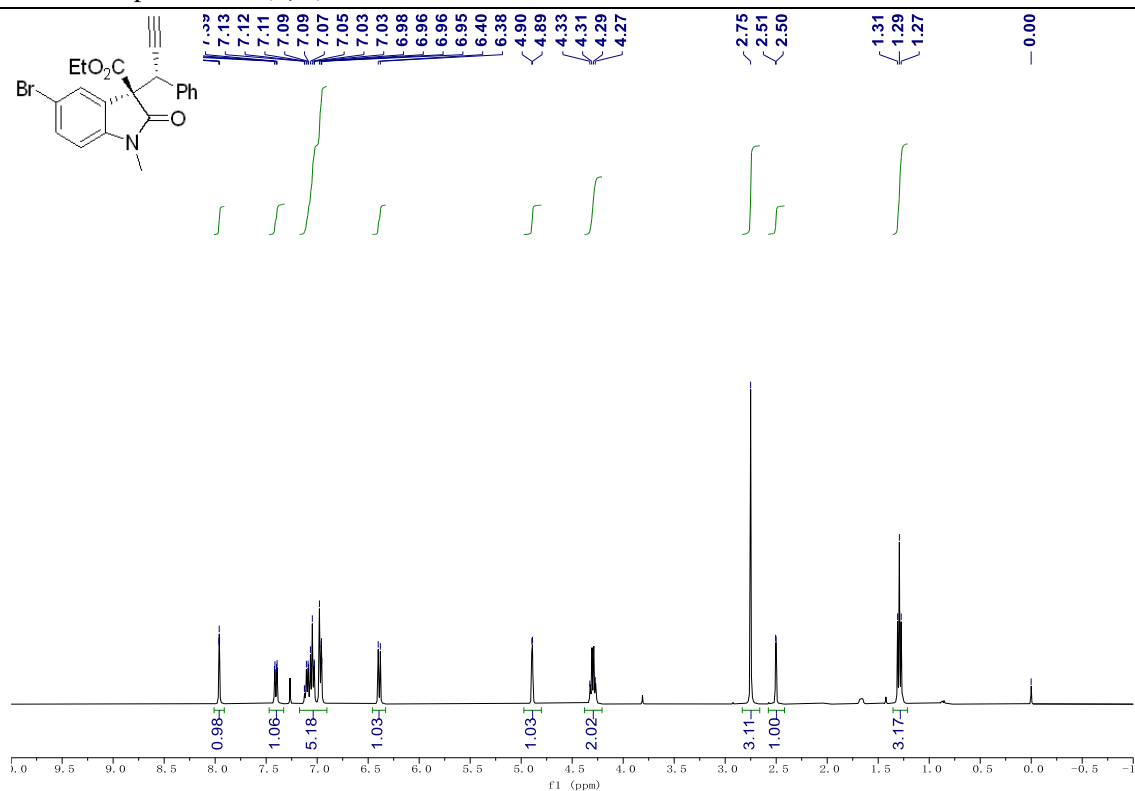

### <sup>13</sup>C NMR Spectrum of (*R,R*)-3b

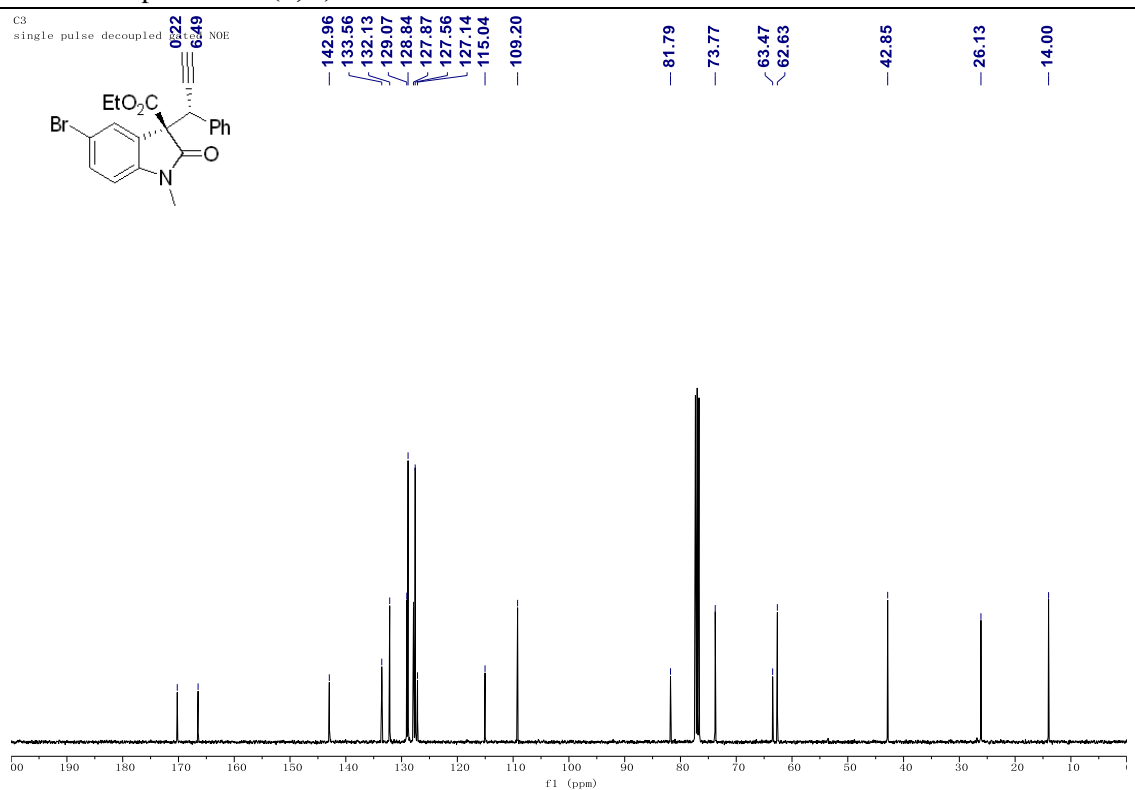

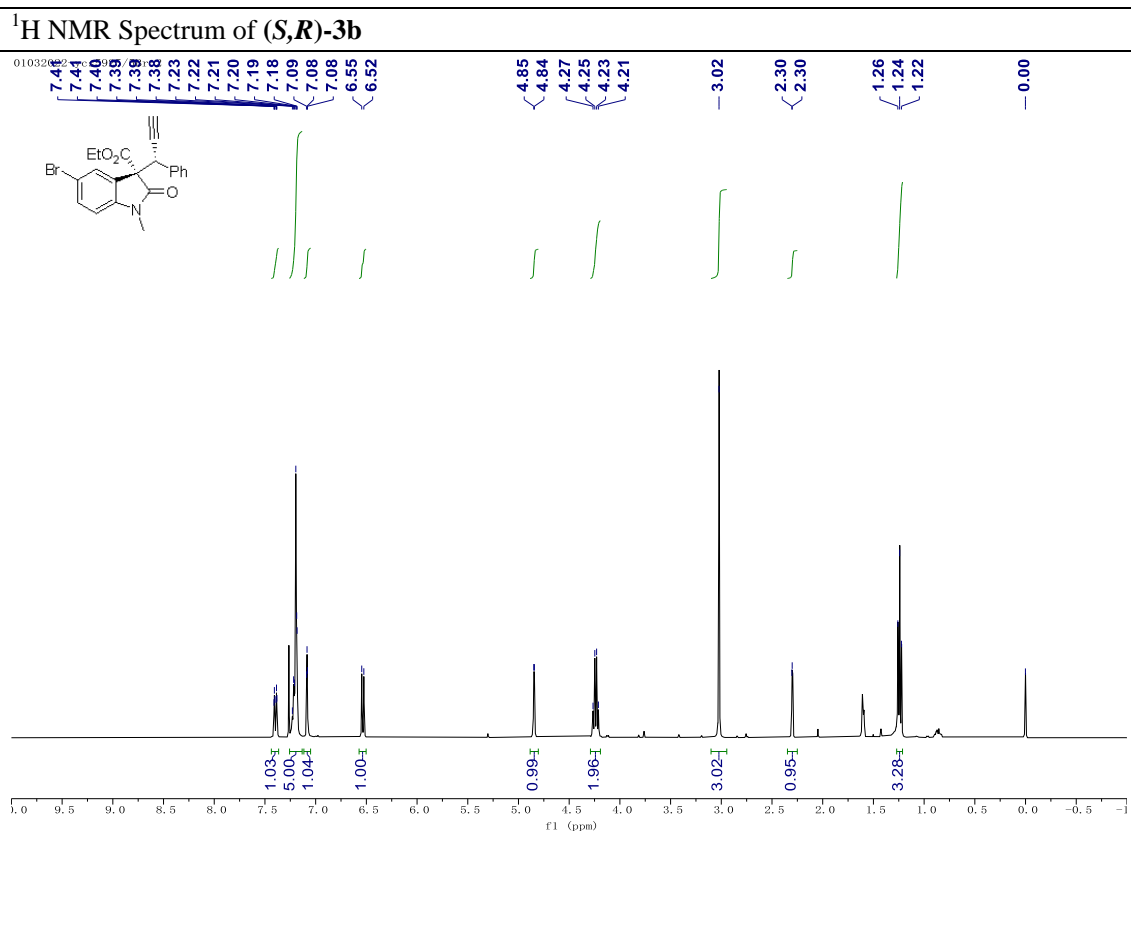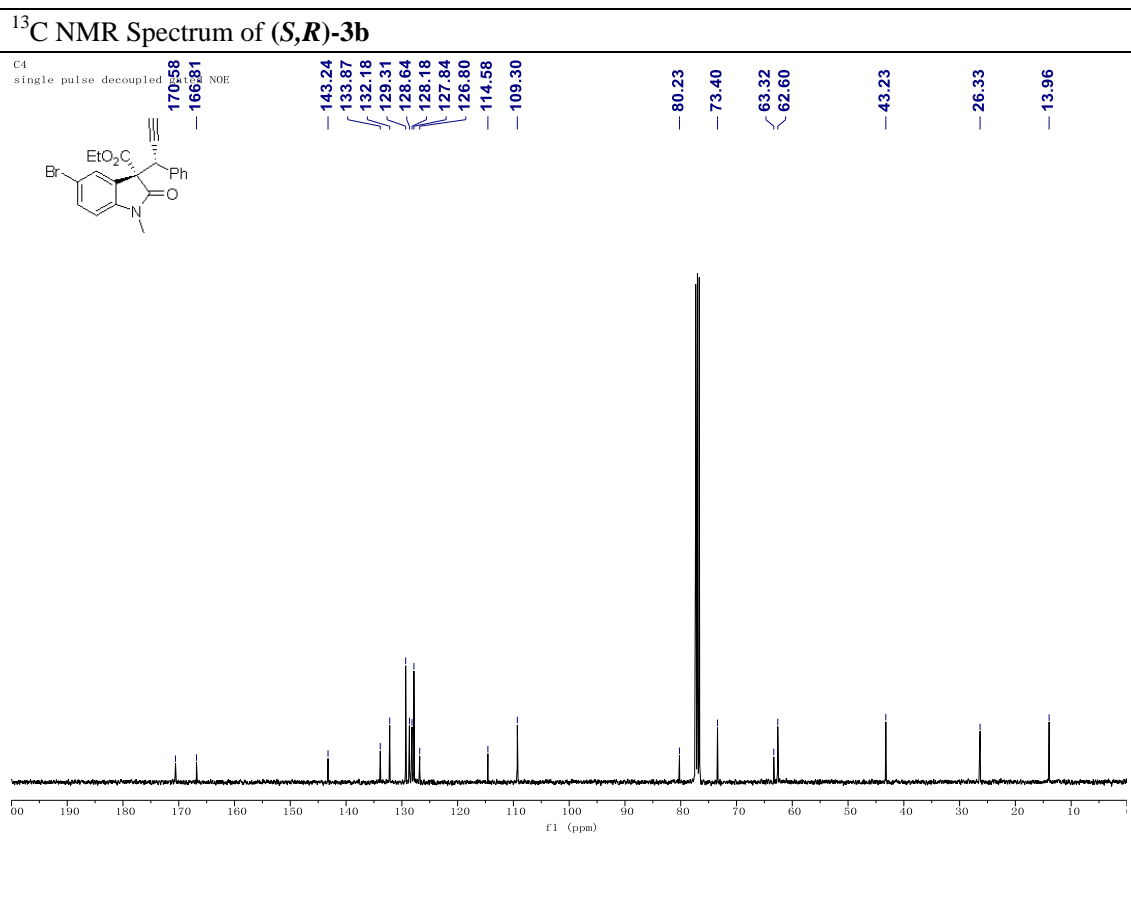

### <sup>1</sup>H NMR Spectrum of (*R,R*)-3c

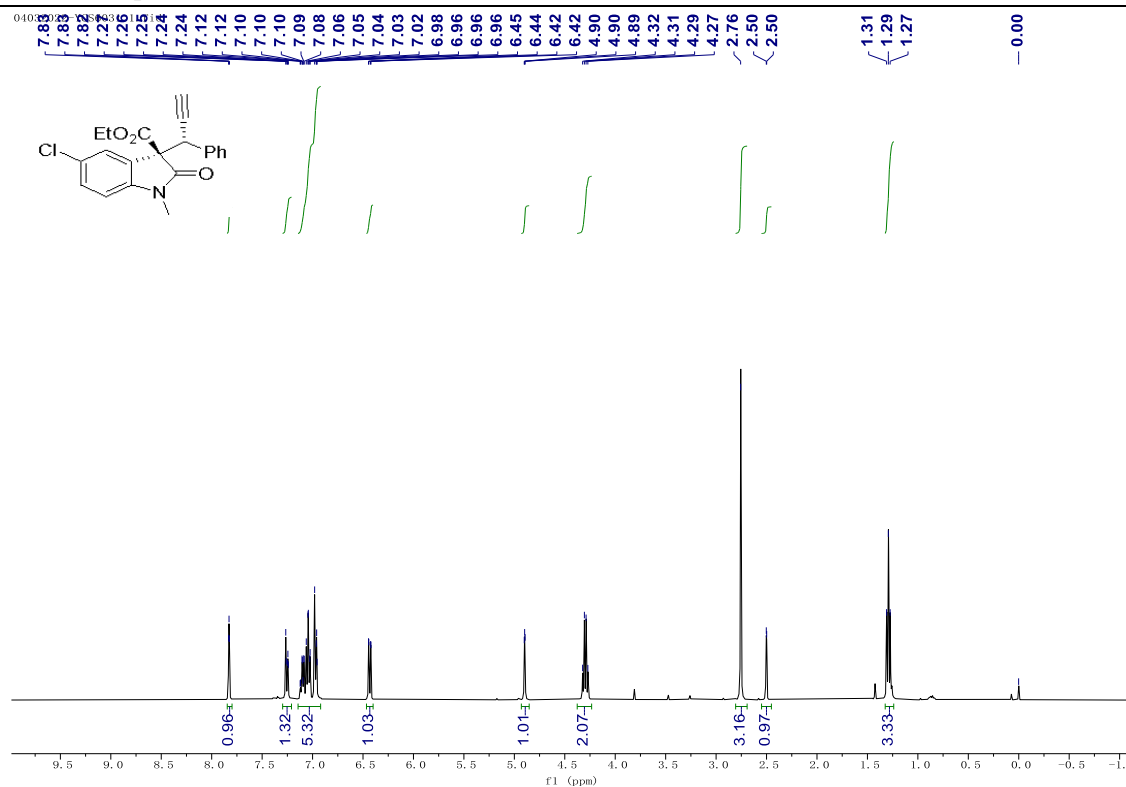

### <sup>13</sup>C NMR Spectrum of (*R,R*)-3c

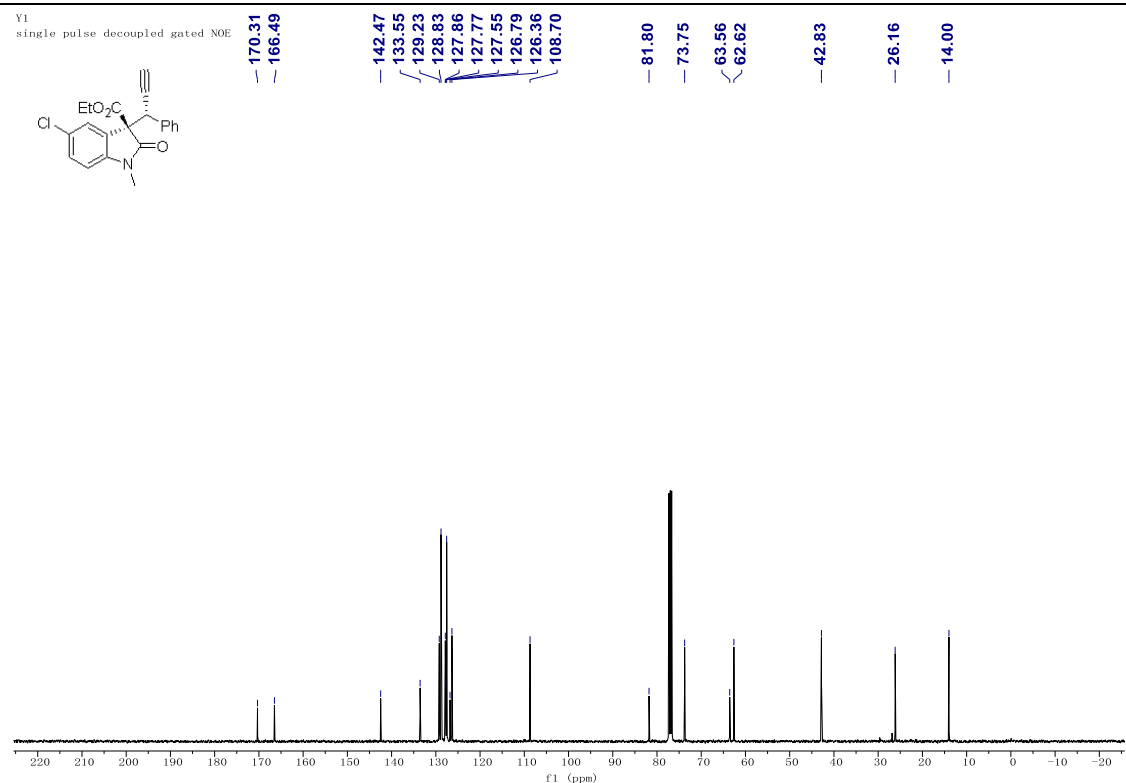

### <sup>1</sup>H NMR Spectrum of (*S,R*)-3c

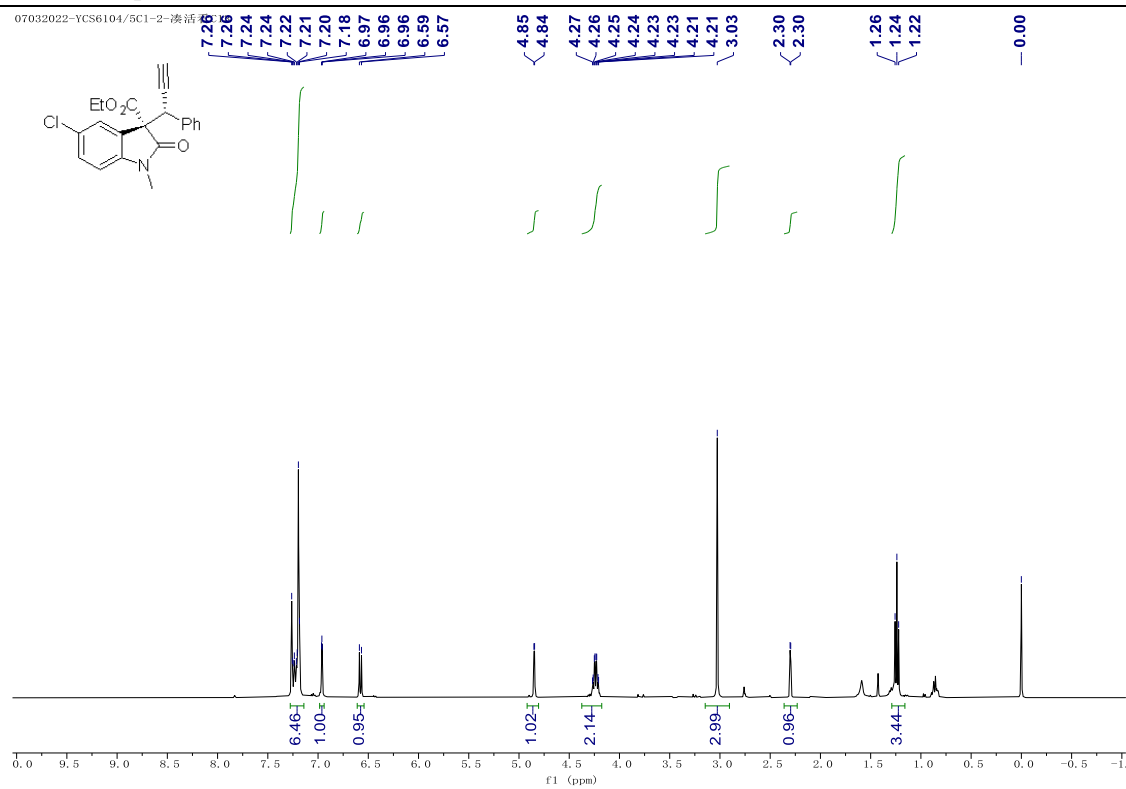

### <sup>13</sup>C NMR Spectrum of (*S,R*)-3c

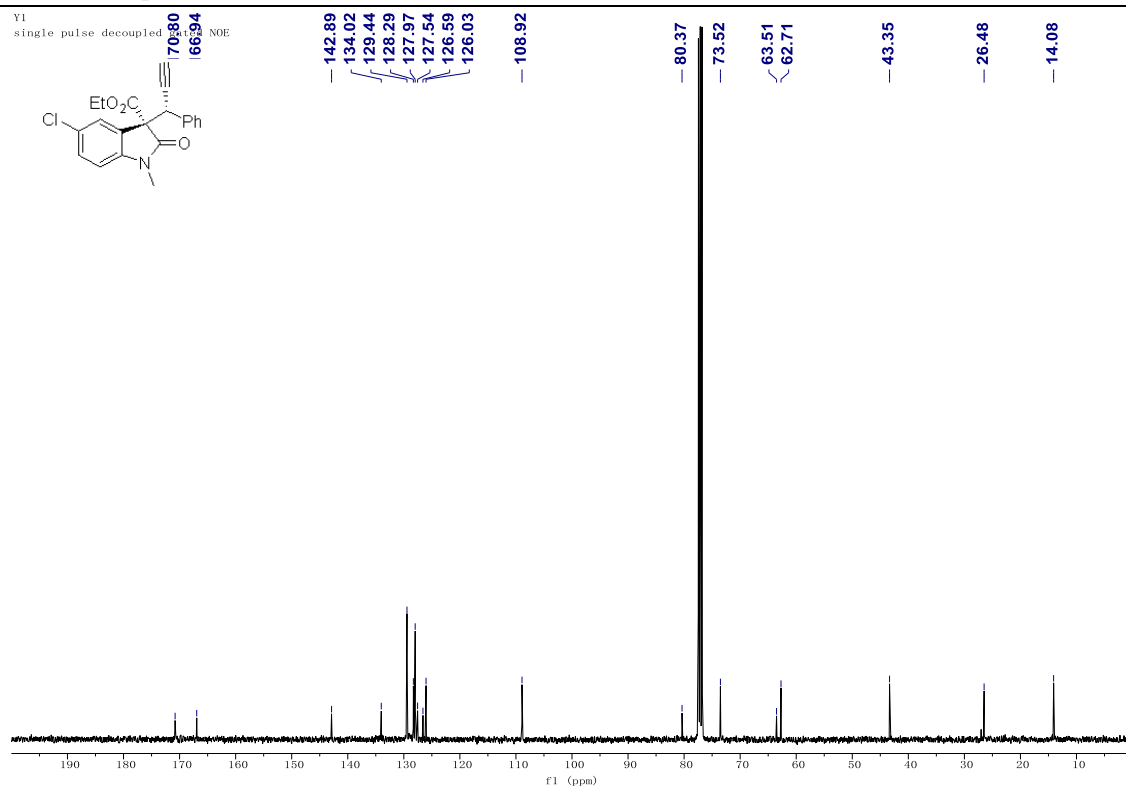

### <sup>1</sup>H NMR Spectrum of (*R,R*)-3d

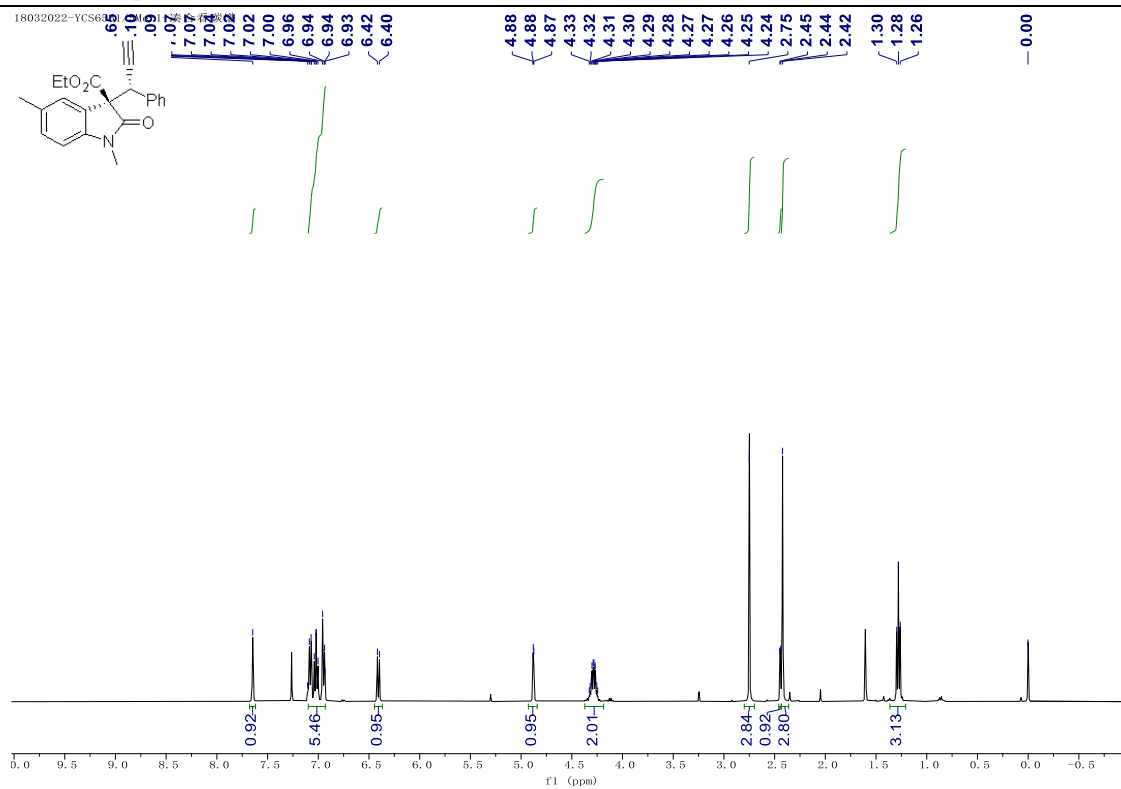

### <sup>13</sup>C NMR Spectrum of (*R,R*)-3d

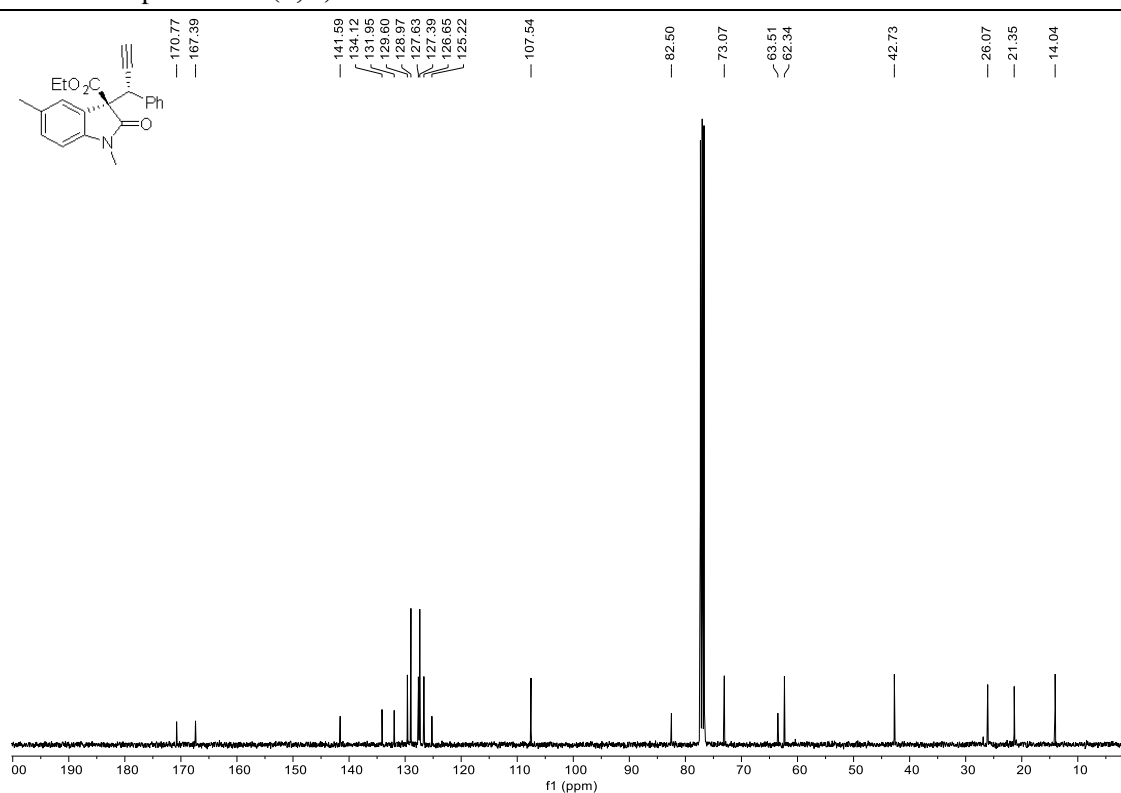



### <sup>1</sup>H NMR Spectrum of (*R,R*)-3e

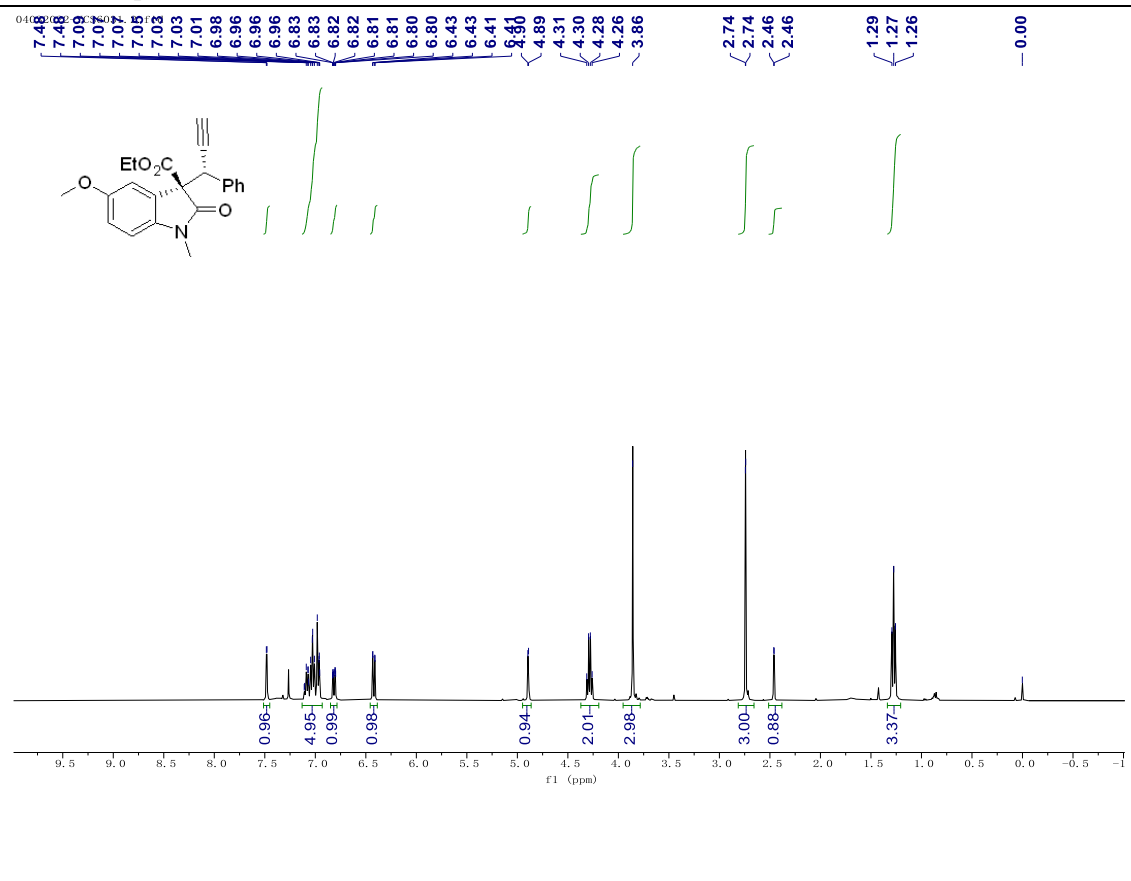

### <sup>13</sup>C NMR Spectrum of (*R,R*)-3e

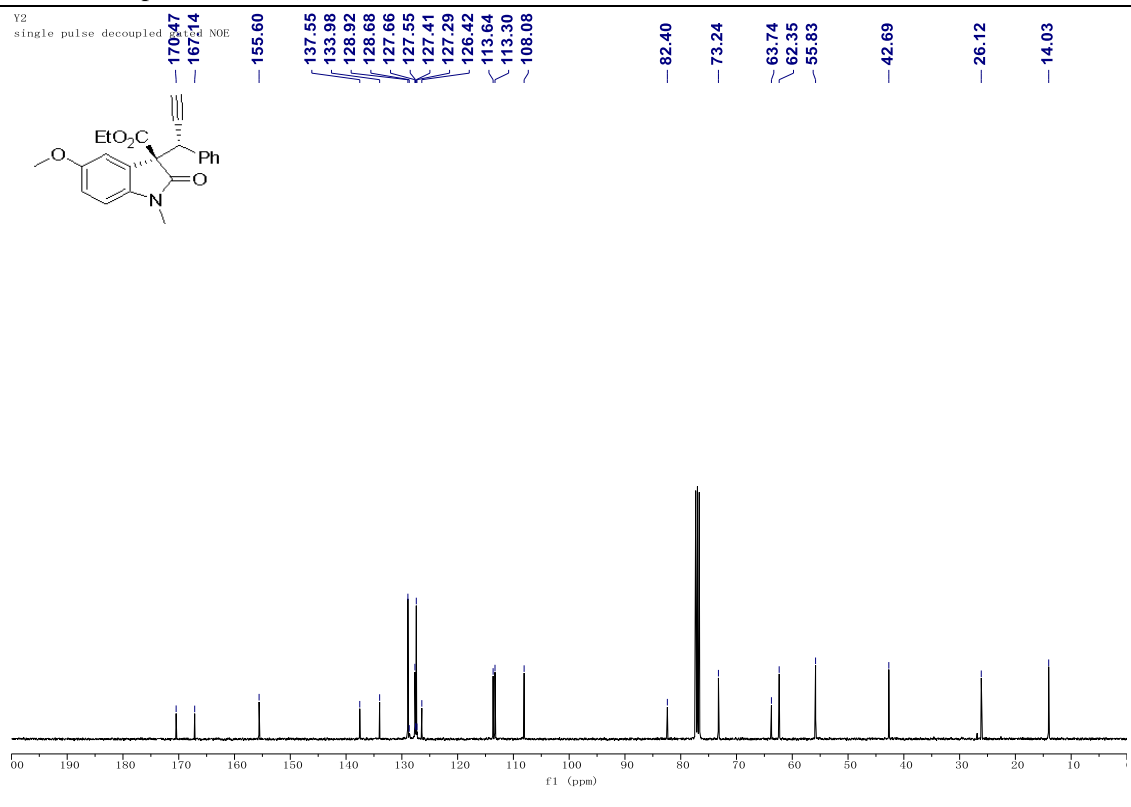



# <sup>1</sup>H NMR Spectrum of (S,R)-3e

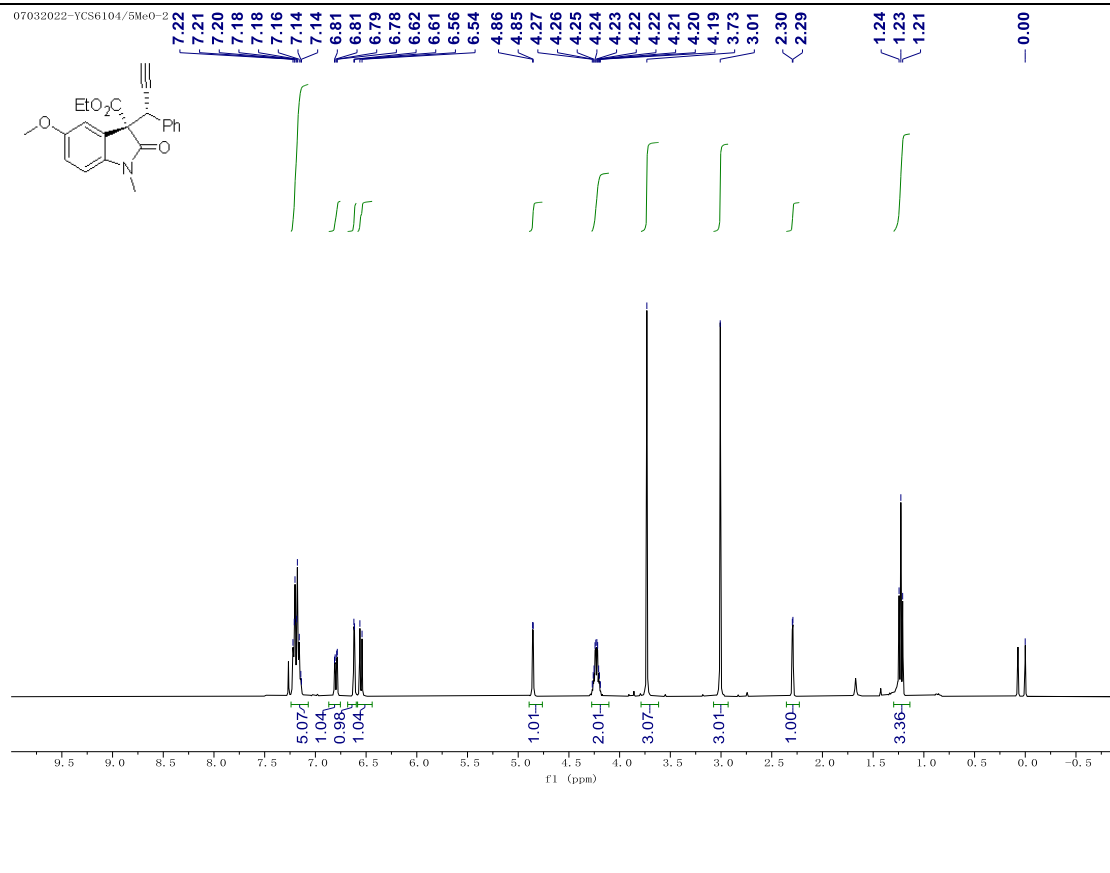

# <sup>13</sup>C NMR Spectrum of (S,R)-3e

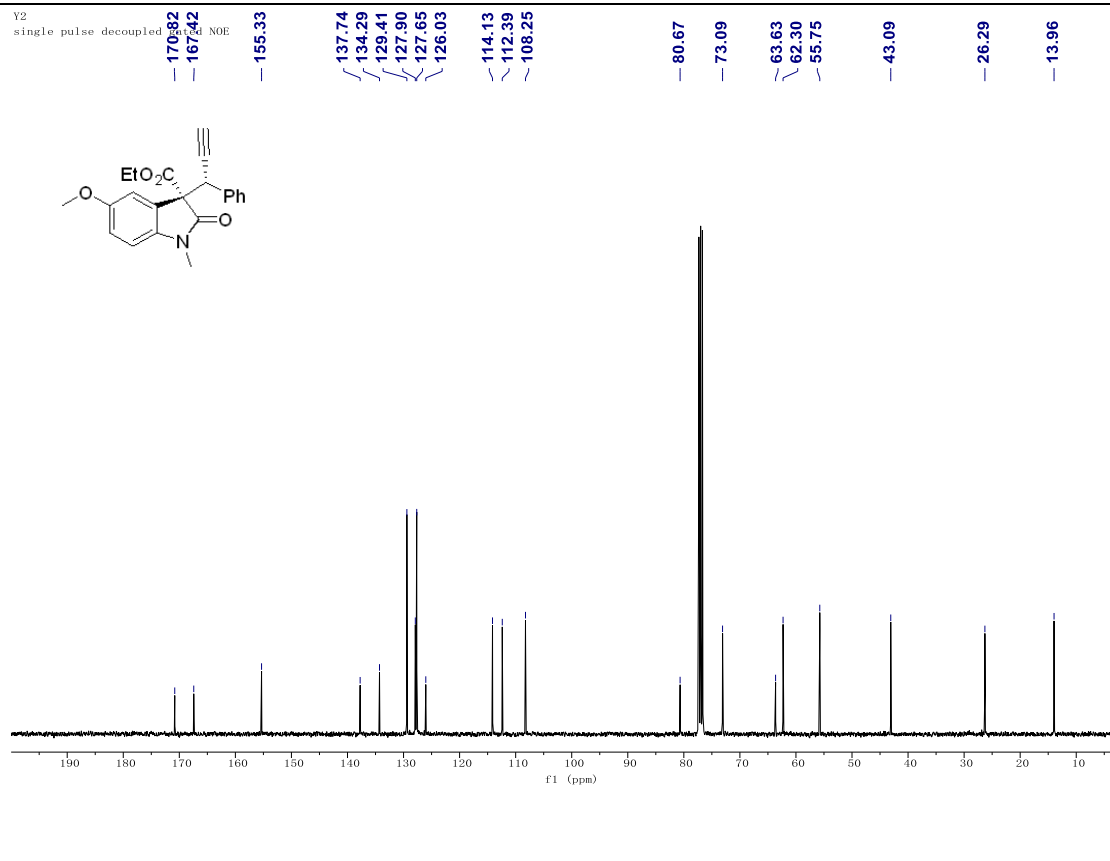

### <sup>1</sup>H NMR Spectrum of (*R,R*)-3f

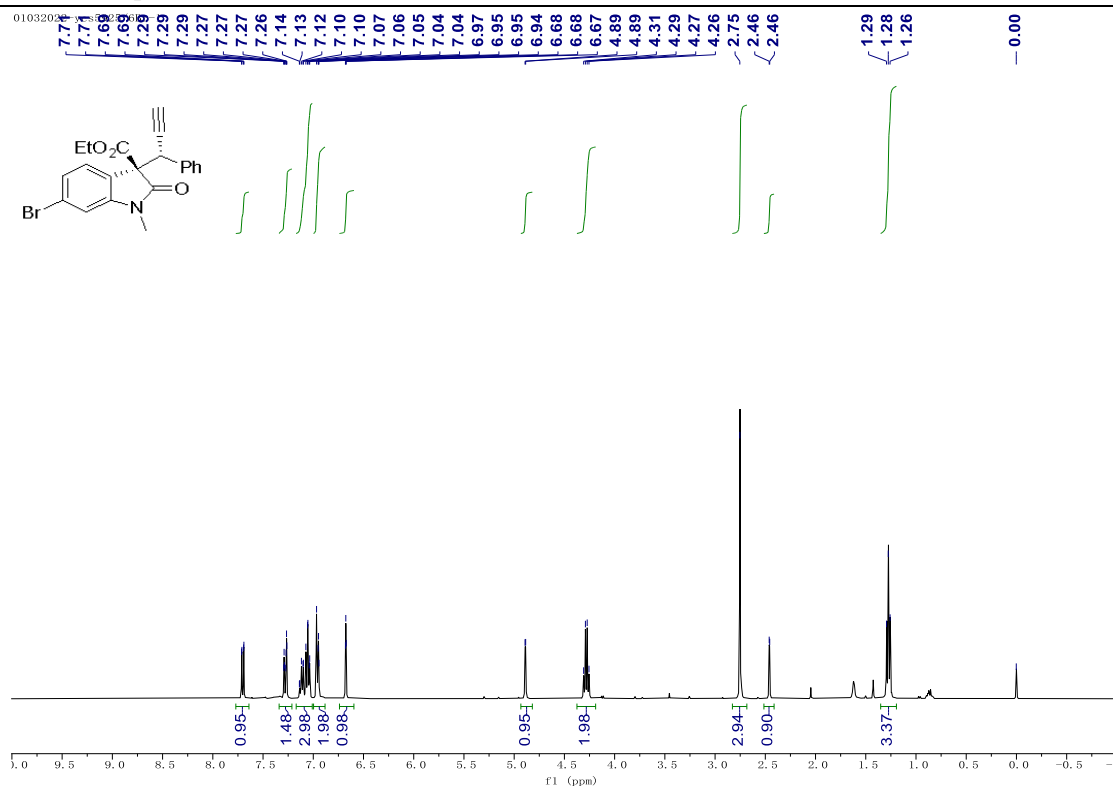

### <sup>13</sup>C NMR Spectrum of (*R,R*)-3f

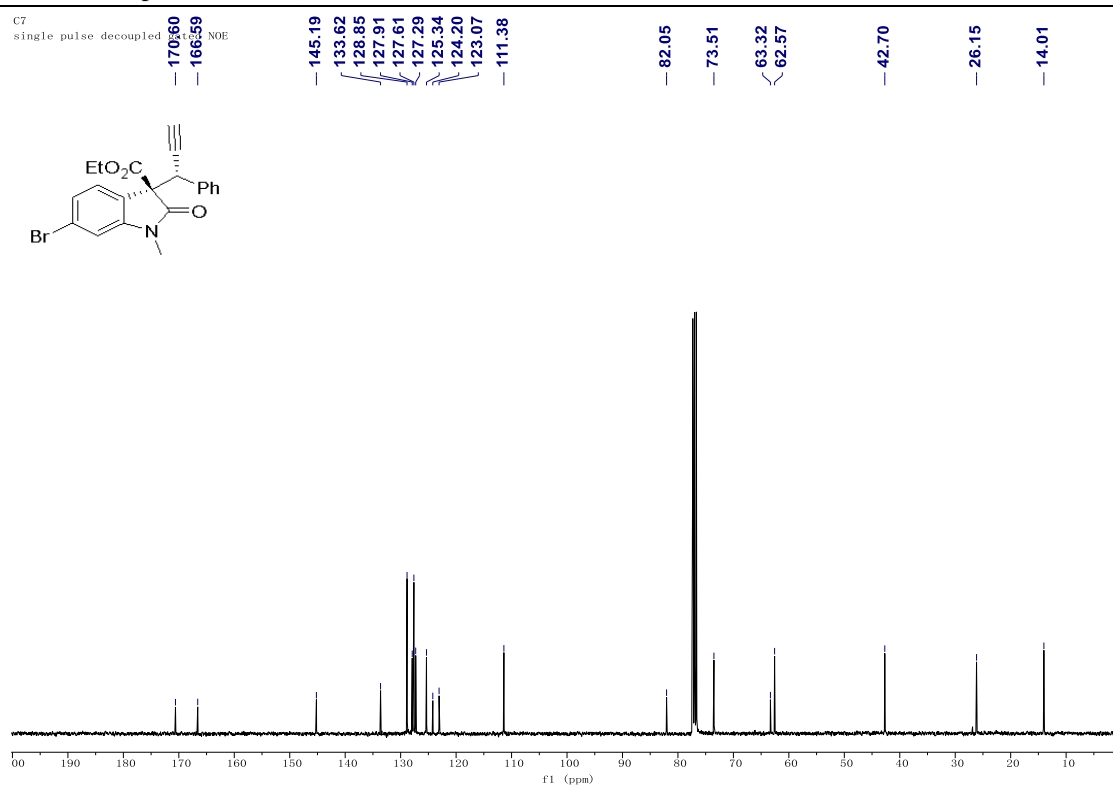

### <sup>1</sup>H NMR Spectrum of (S,R)-3f

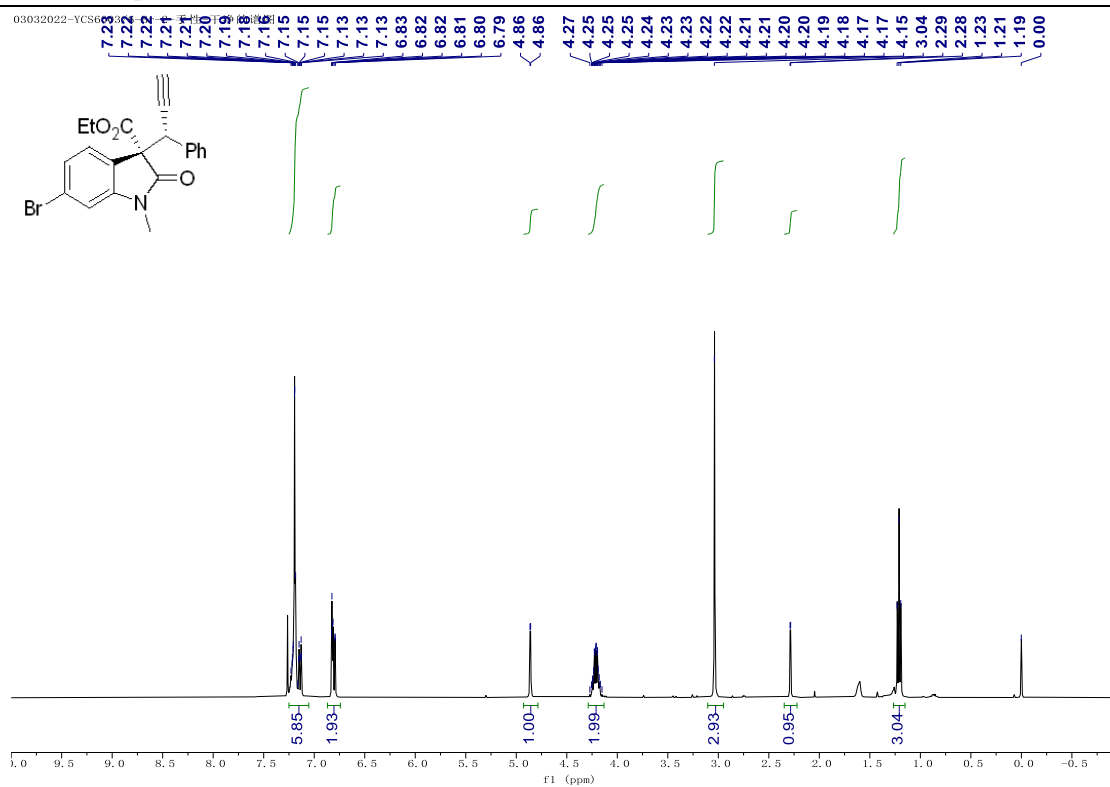

### <sup>13</sup>C NMR Spectrum of (S,R)-3f

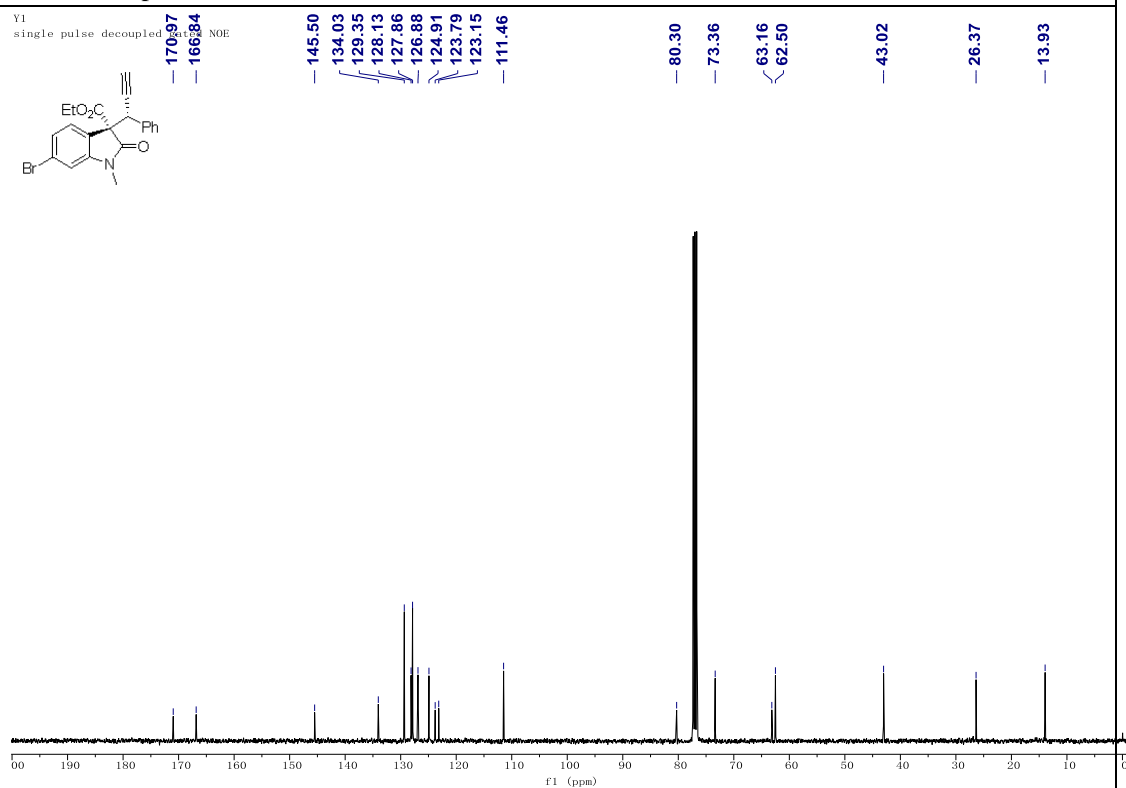

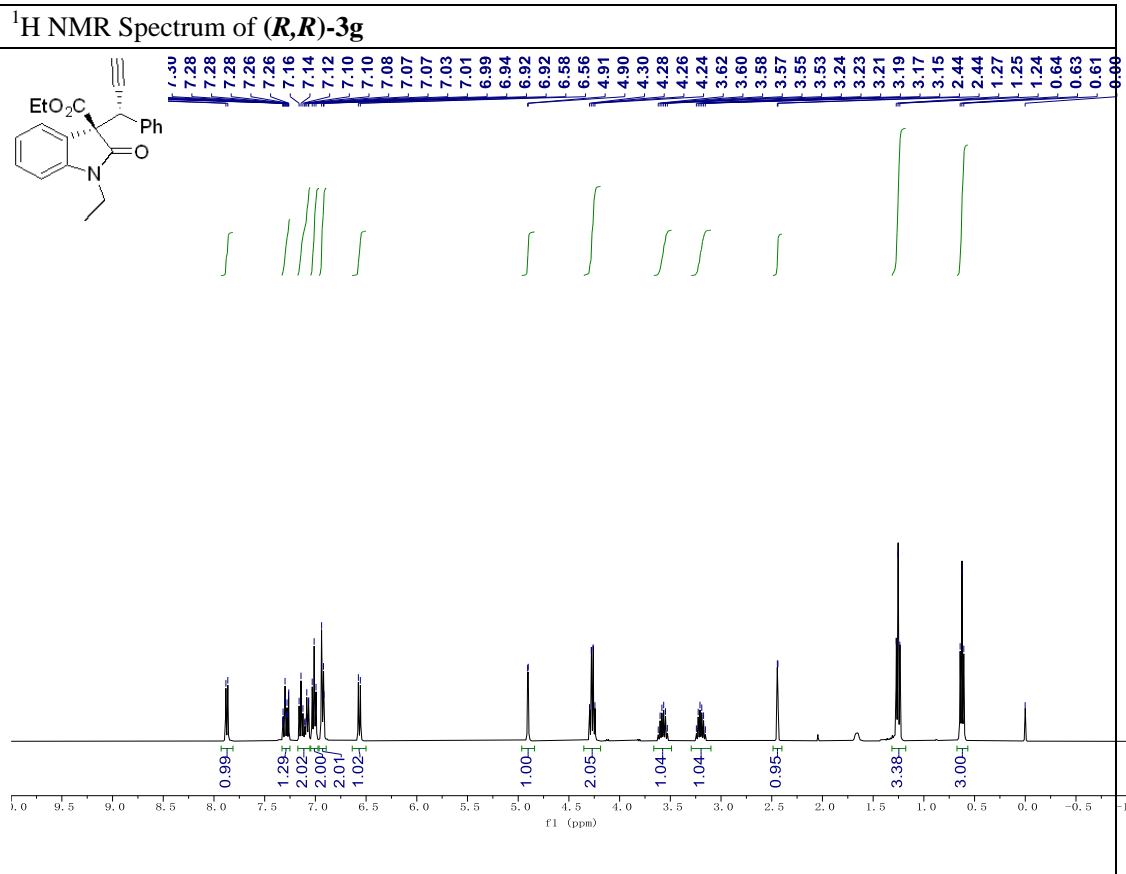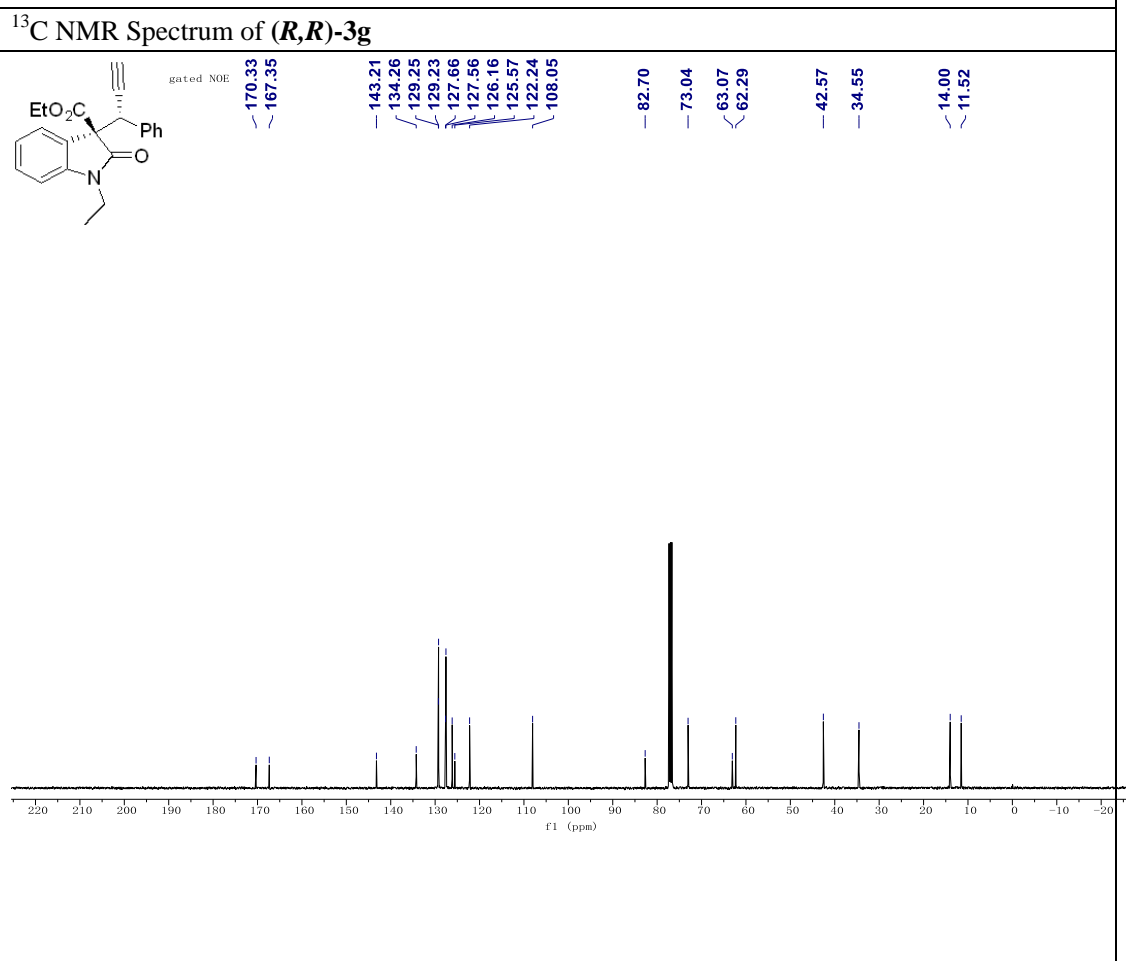

### <sup>1</sup>H NMR Spectrum of (*S,R*)-3g

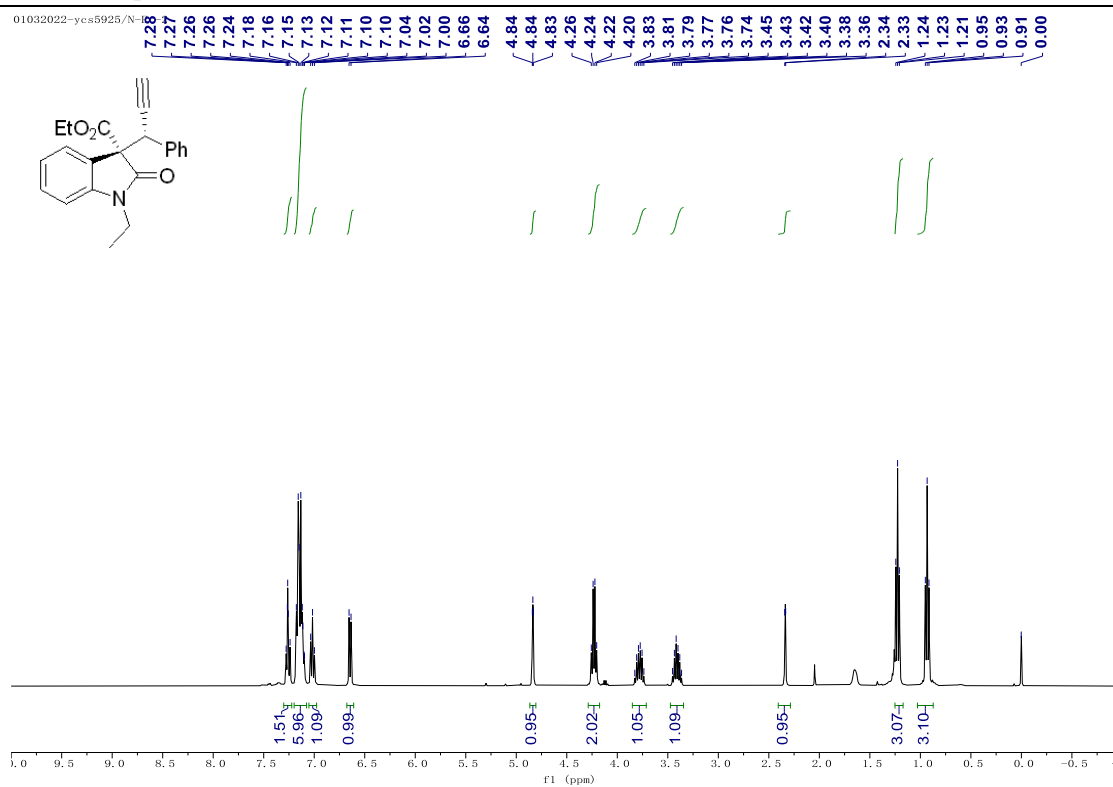

### <sup>13</sup>C NMR Spectrum of (*S,R*)-3g

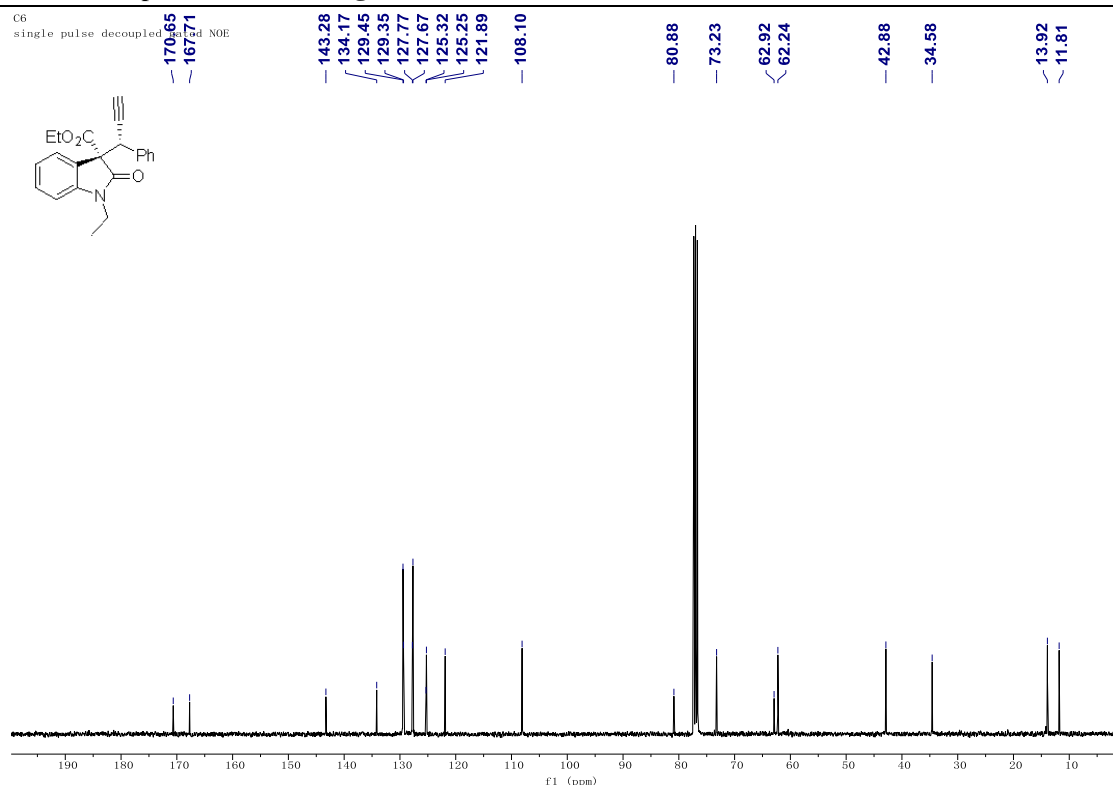

### <sup>1</sup>H NMR Spectrum of (*R,R*)-3h

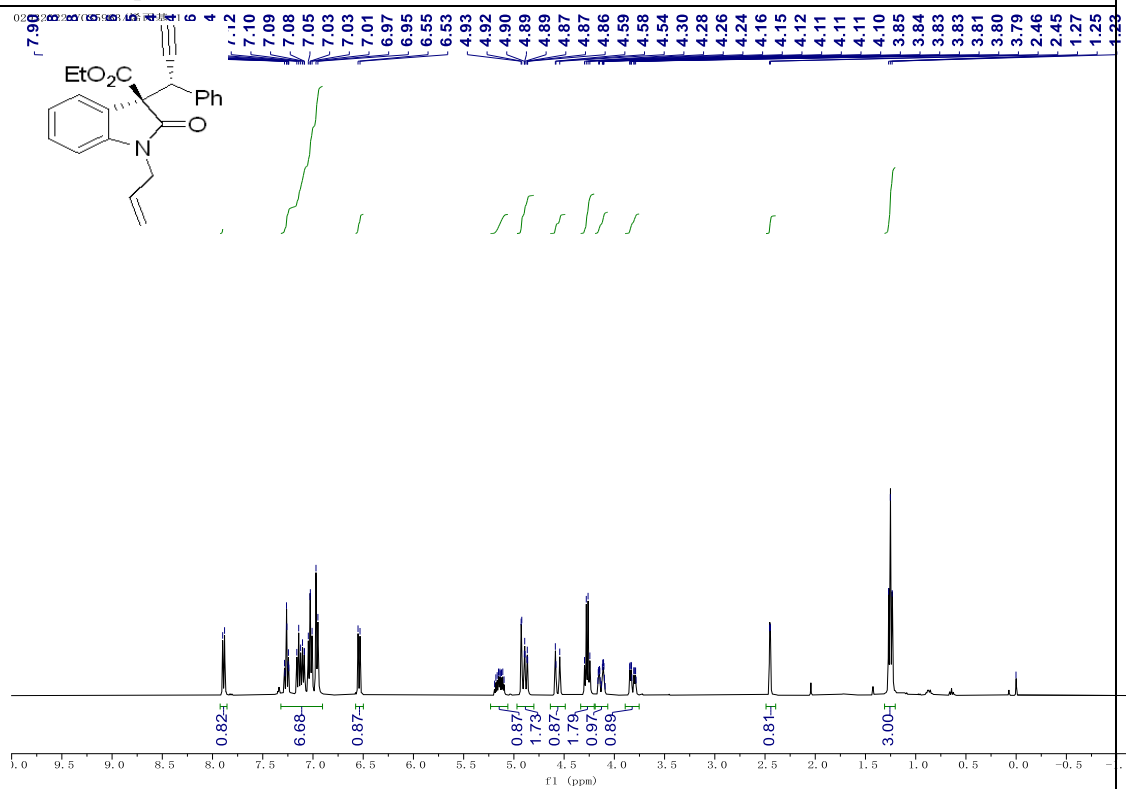

### <sup>13</sup>C NMR Spectrum of (*R,R*)-3h

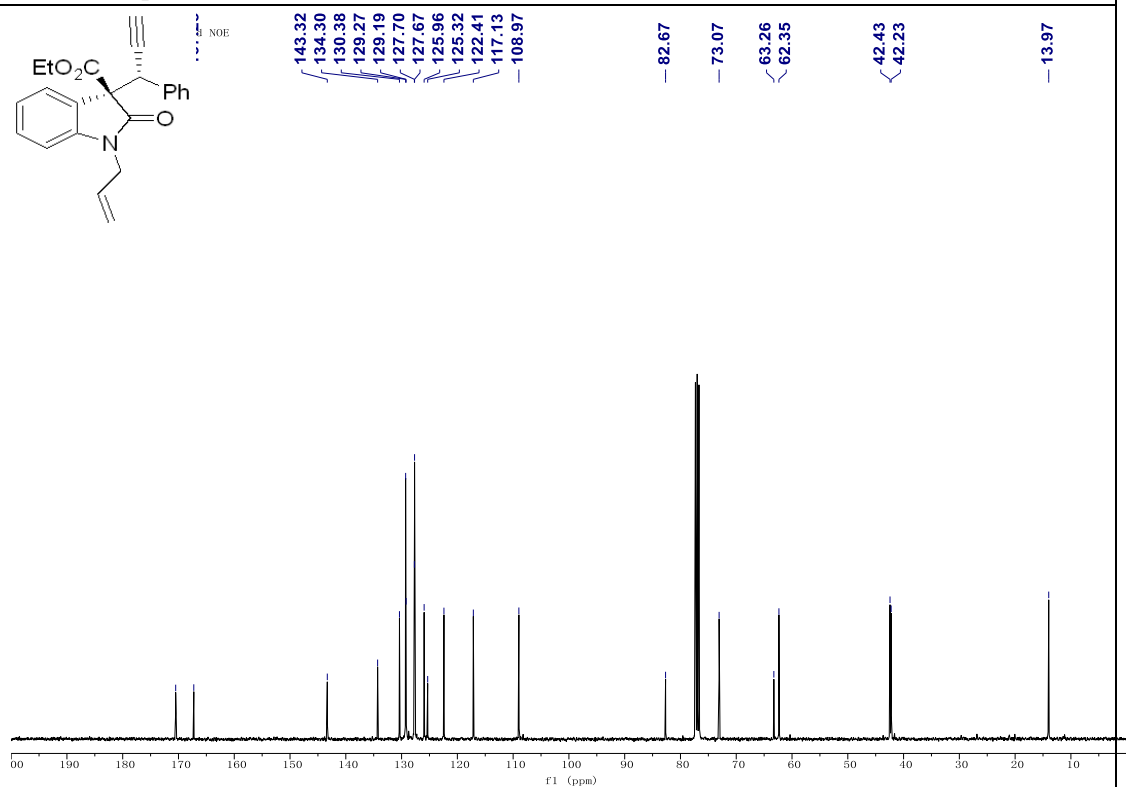

<sup>1</sup>H NMR Spectrum of (S,R)-3h

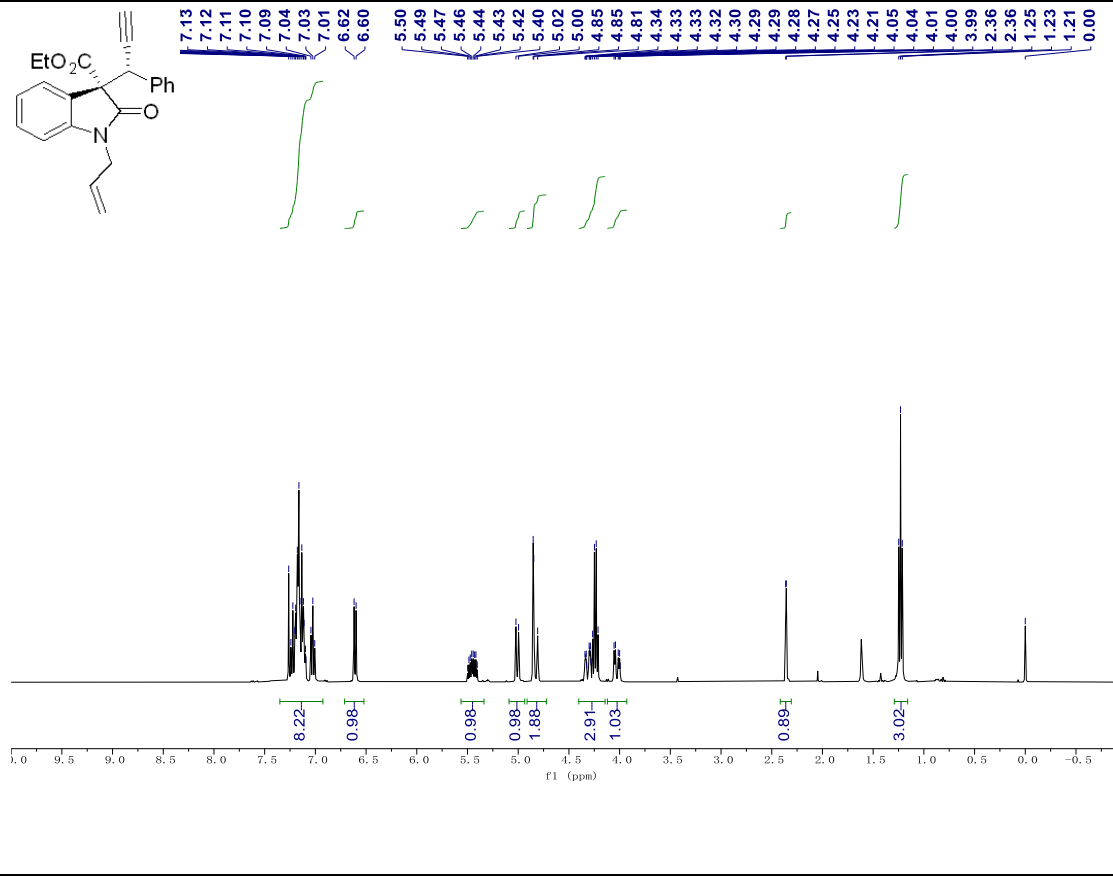

<sup>13</sup>C NMR Spectrum of (S,R)-3h

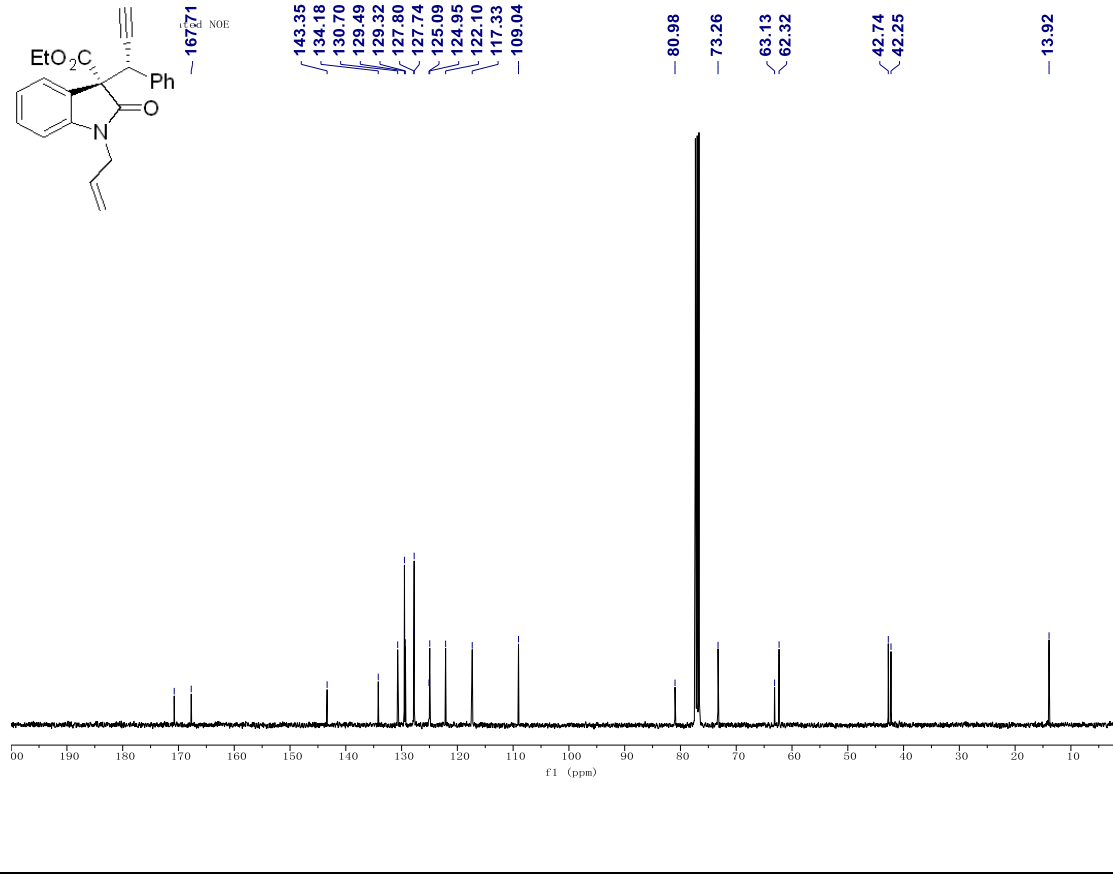

### <sup>1</sup>H NMR Spectrum of (*R,R*)-3i

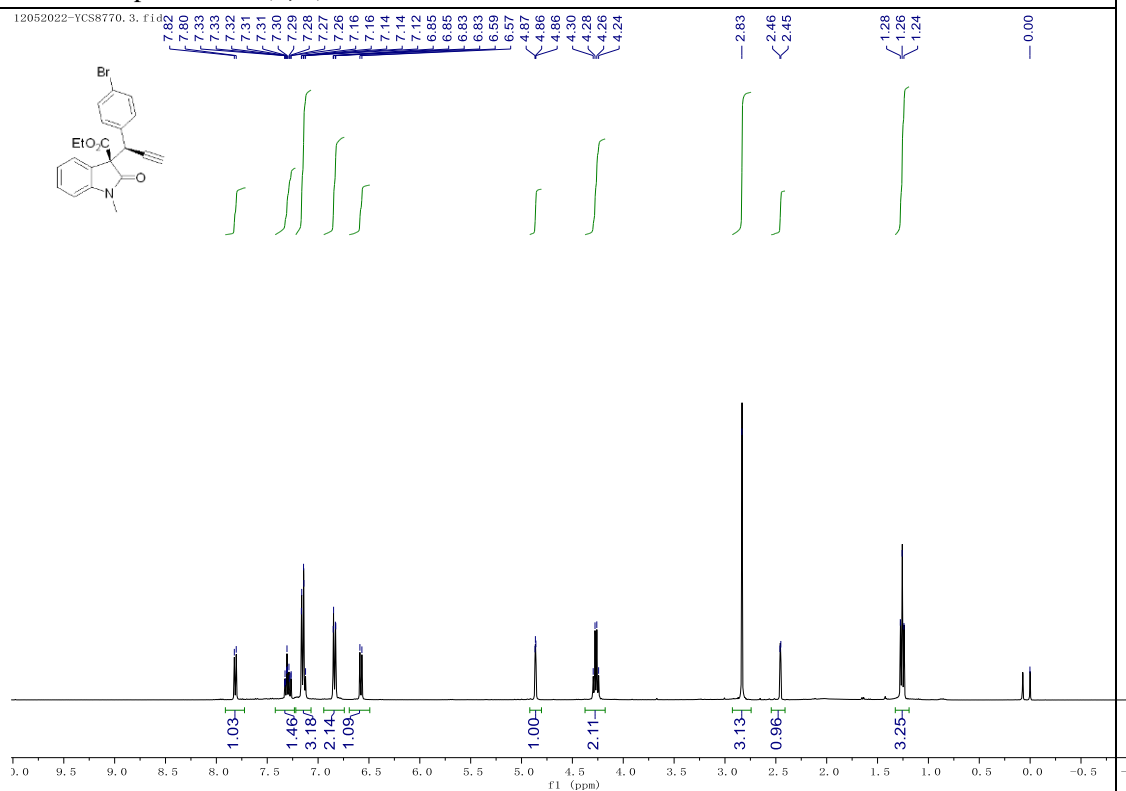

### <sup>13</sup>C NMR Spectrum of (*R,R*)-3i

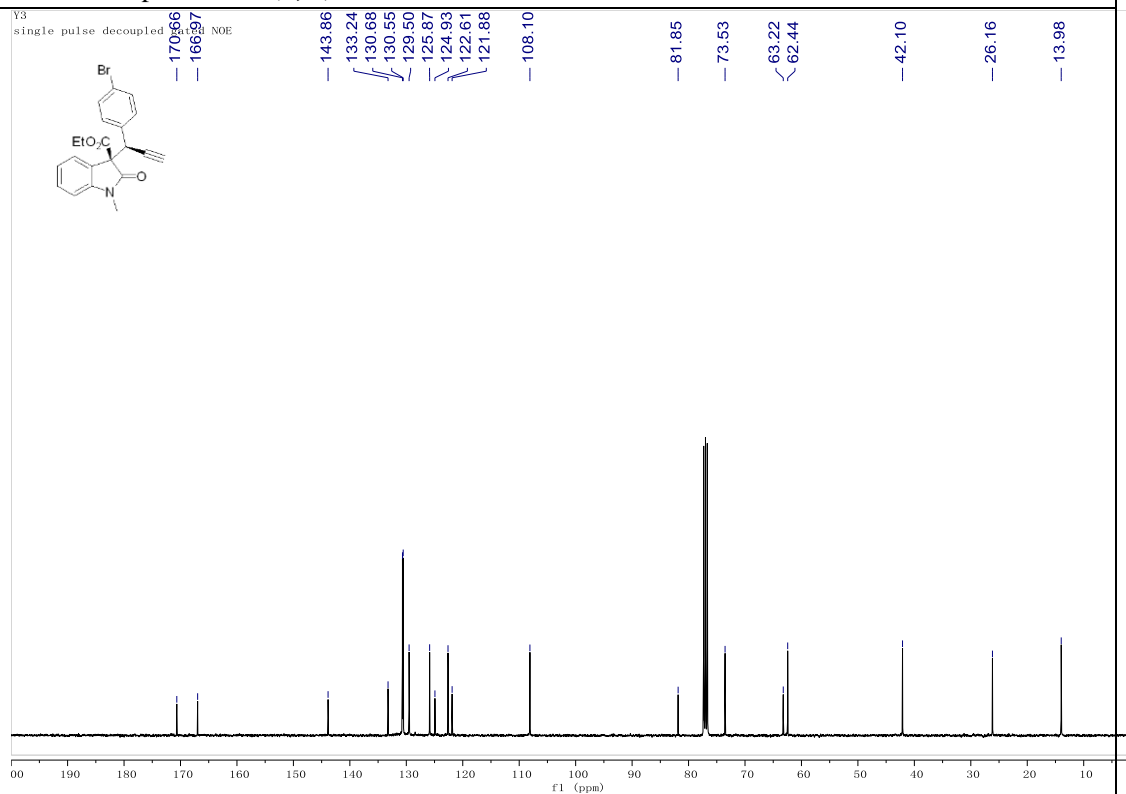





### <sup>1</sup>H NMR Spectrum of (*R,R*)-3j

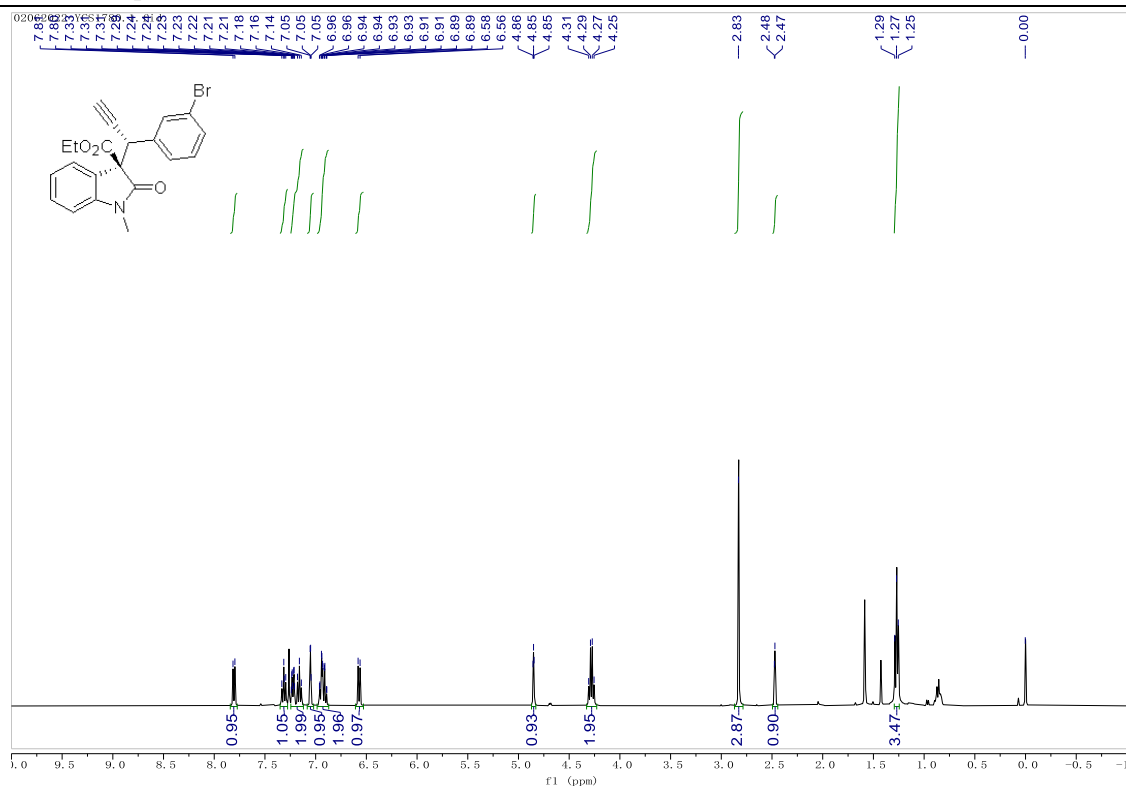

### <sup>13</sup>C NMR Spectrum of (*R,R*)-3j

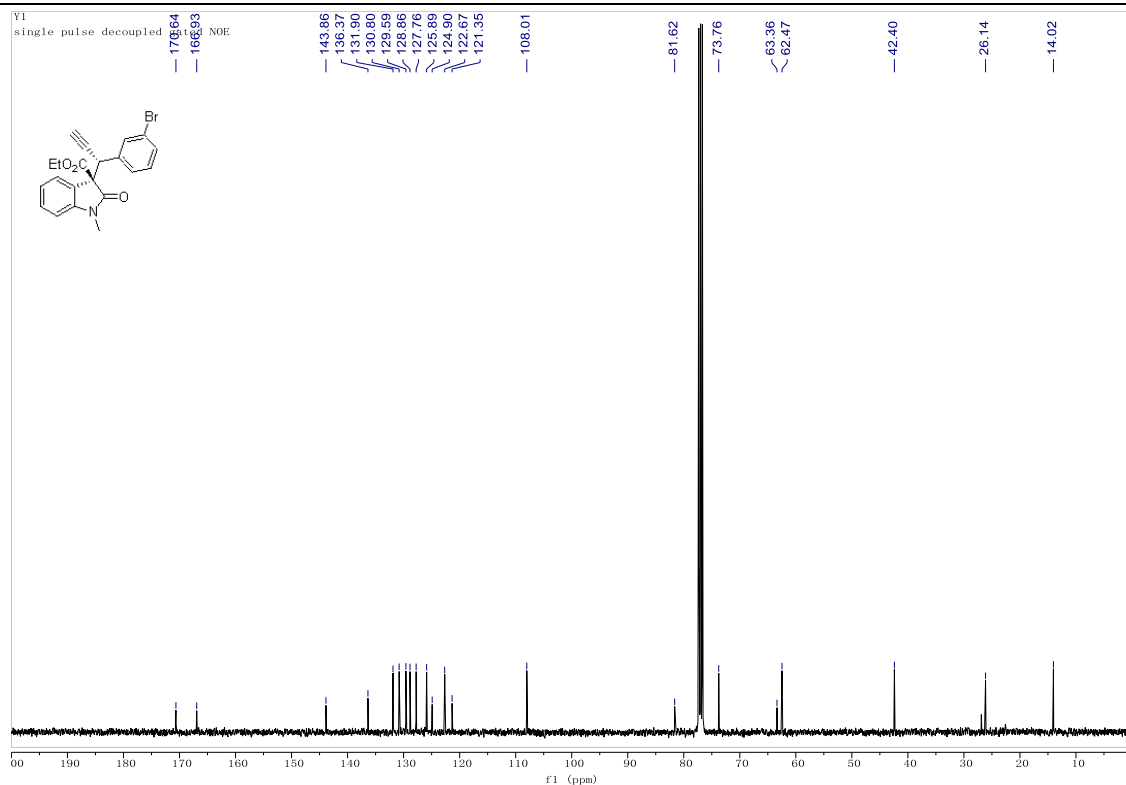

### <sup>1</sup>H NMR Spectrum of (*S,R*)-3j

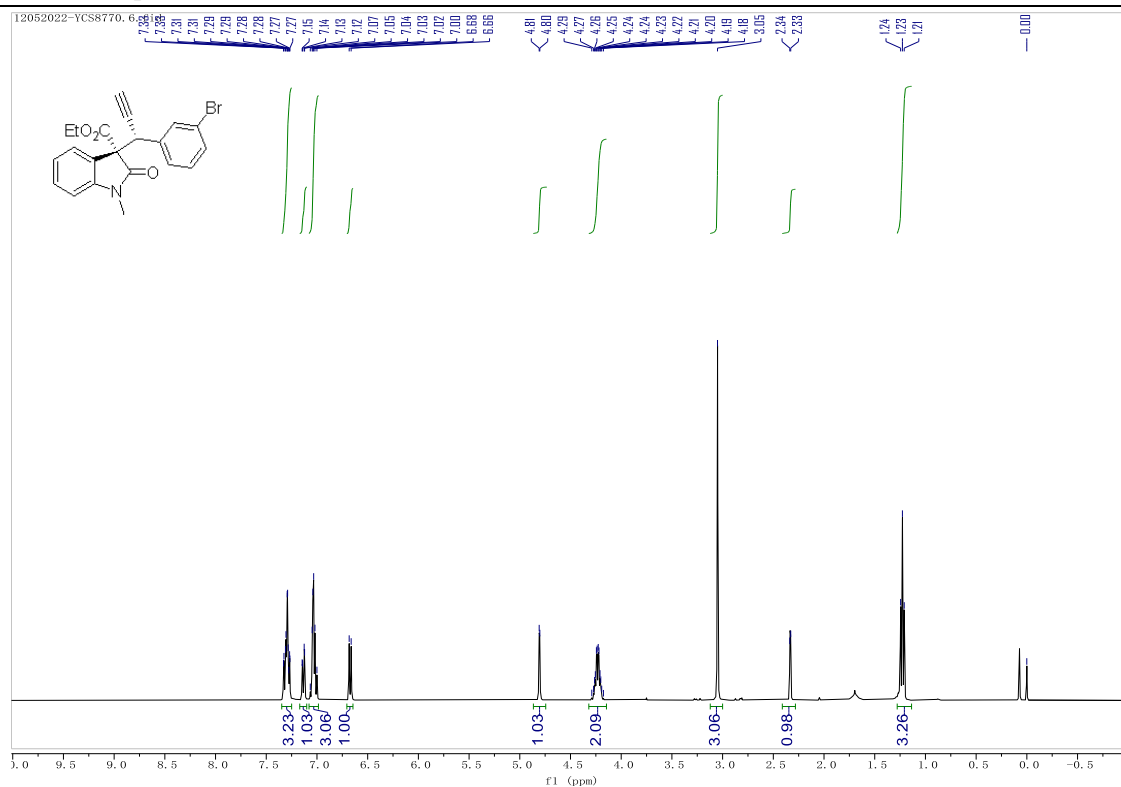

### <sup>13</sup>C NMR Spectrum of (*S,R*)-3j

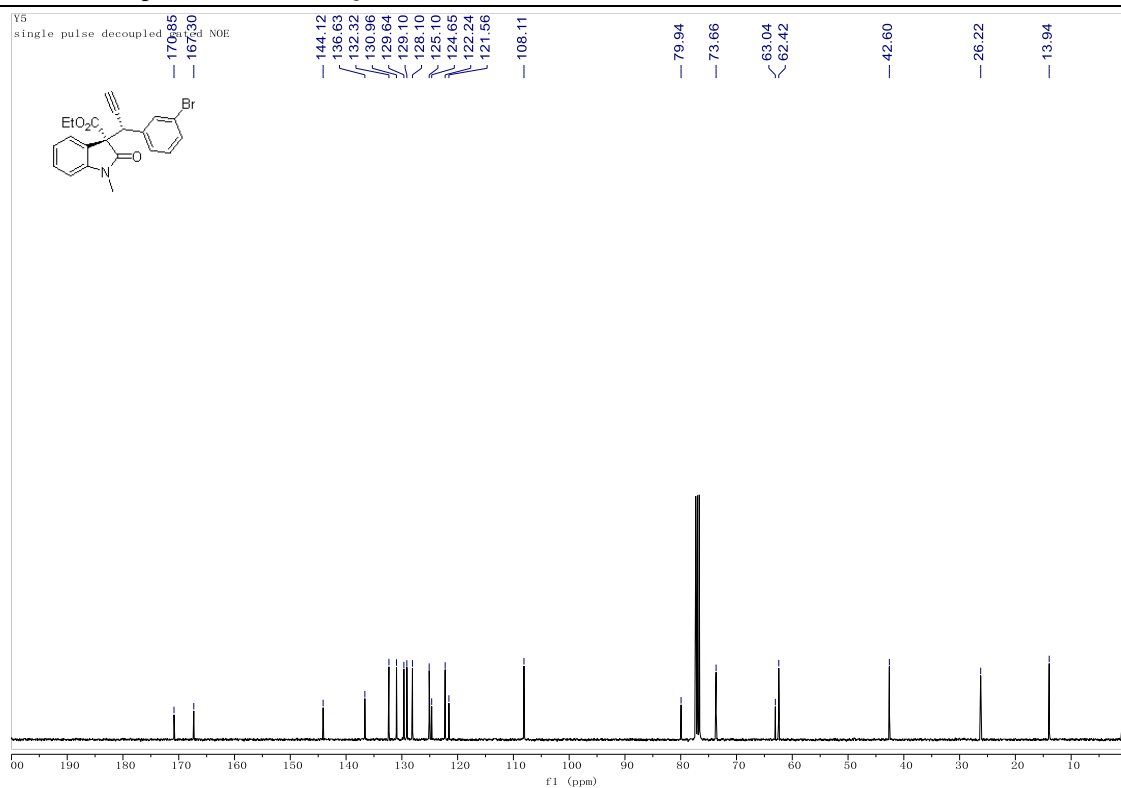

### <sup>1</sup>H NMR Spectrum of (*R,R*)-3k

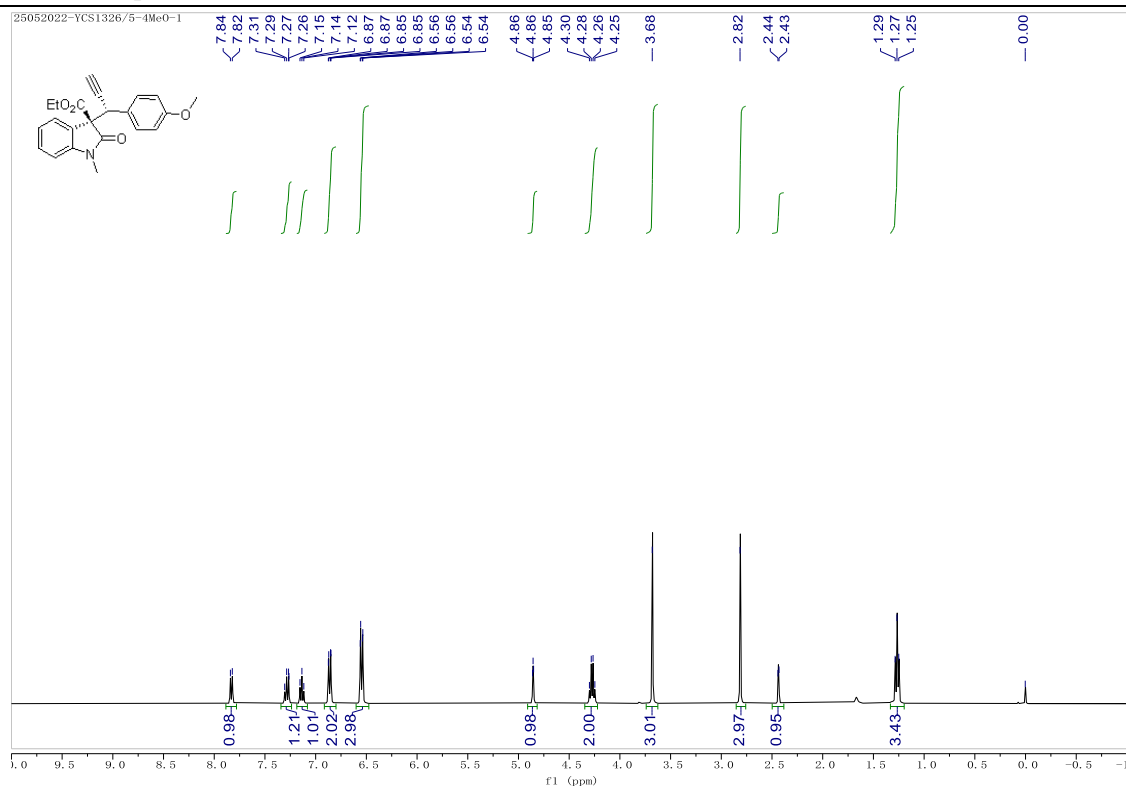

### <sup>13</sup>C NMR Spectrum of (*R,R*)-3k

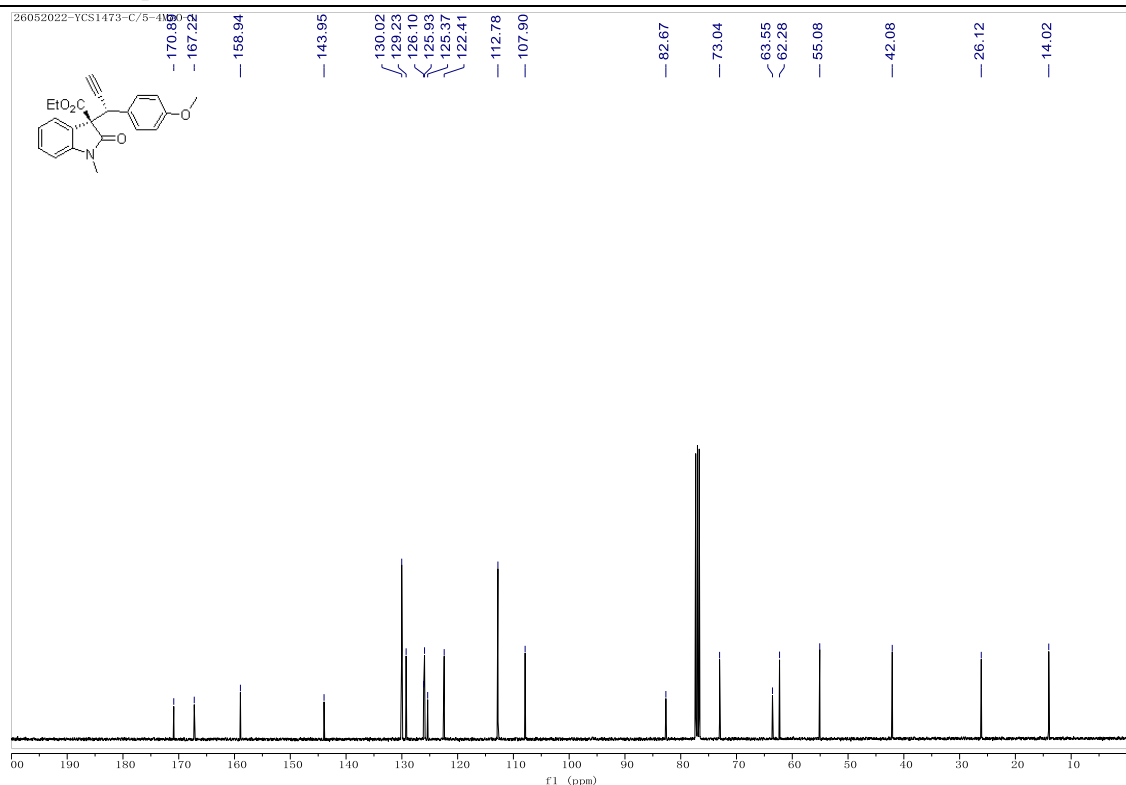

### <sup>1</sup>H NMR Spectrum of (*S,R*)-3k

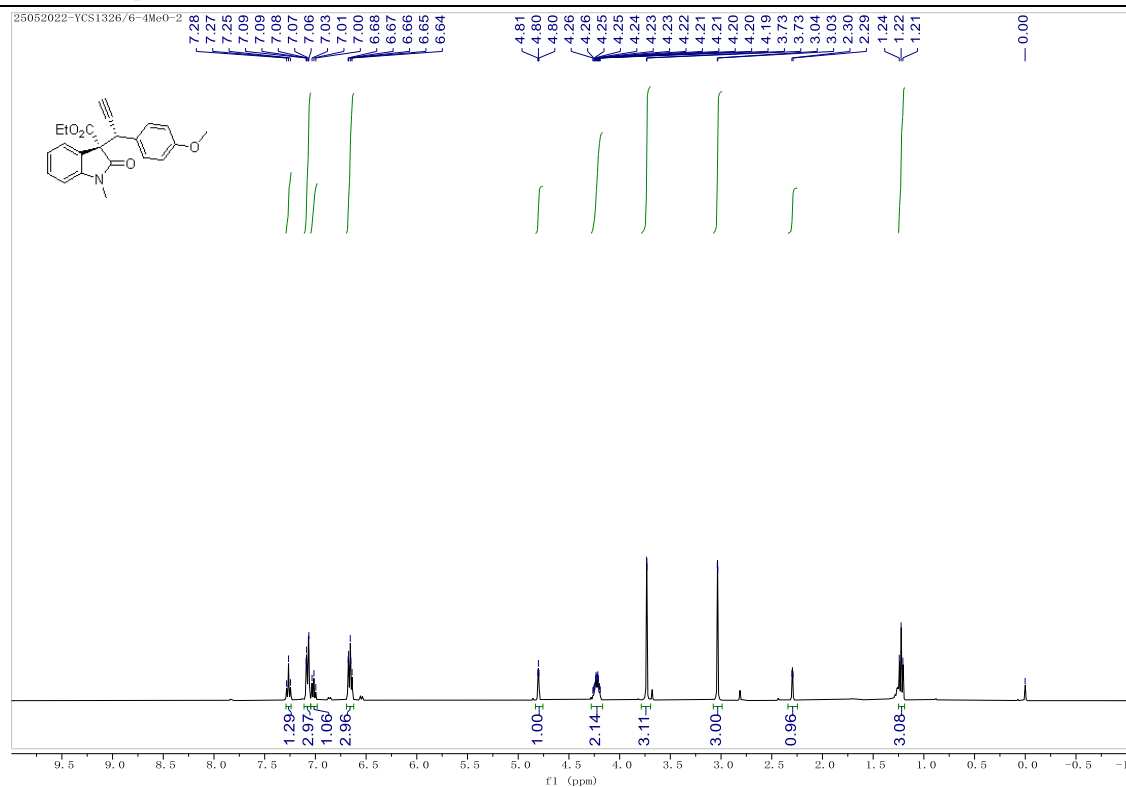

### <sup>13</sup>C NMR Spectrum of (*S,R*)-3k

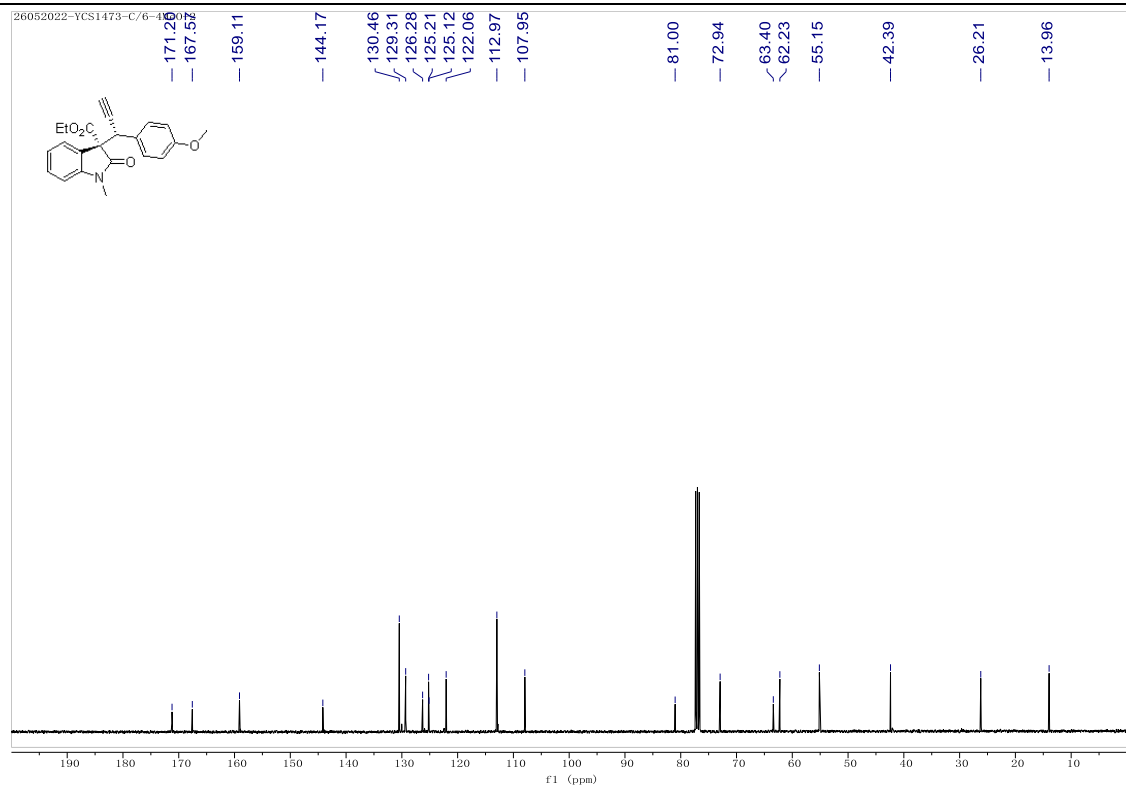

### <sup>1</sup>H NMR Spectrum of (*R,R*)-31

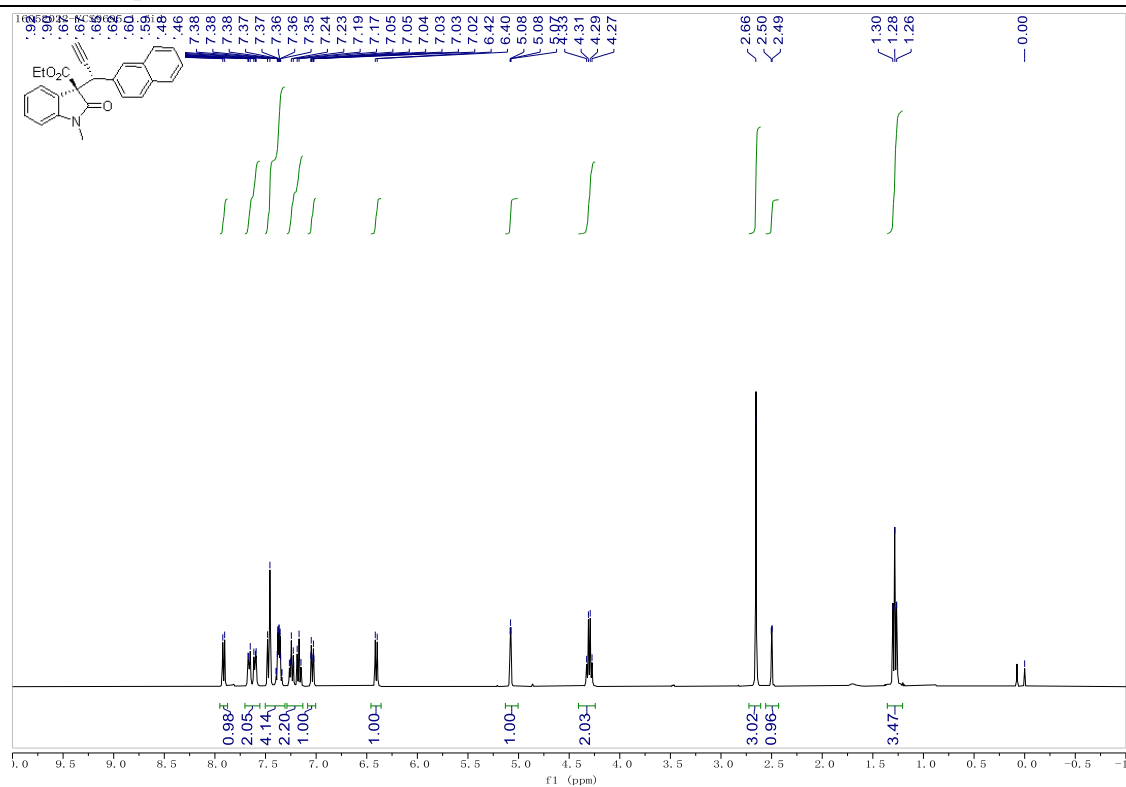

### <sup>13</sup>C NMR Spectrum of (*R,R*)-31

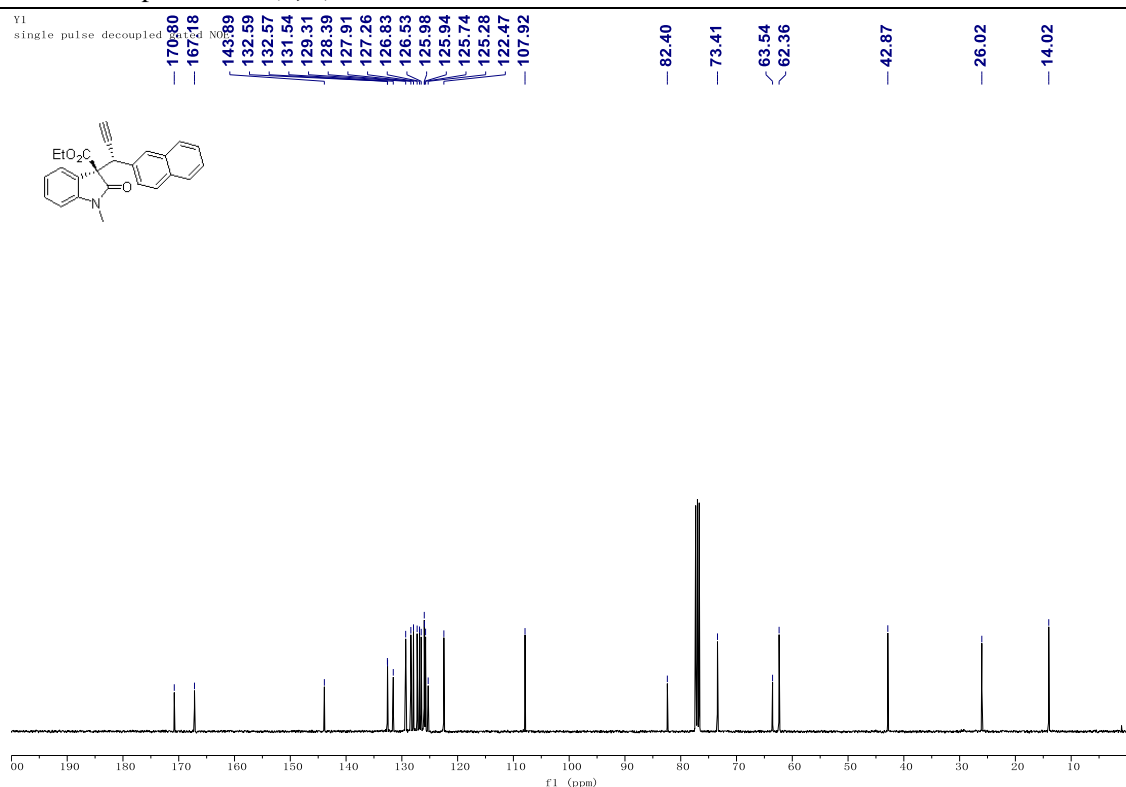

### <sup>1</sup>H NMR Spectrum of (*S,R*)-3I

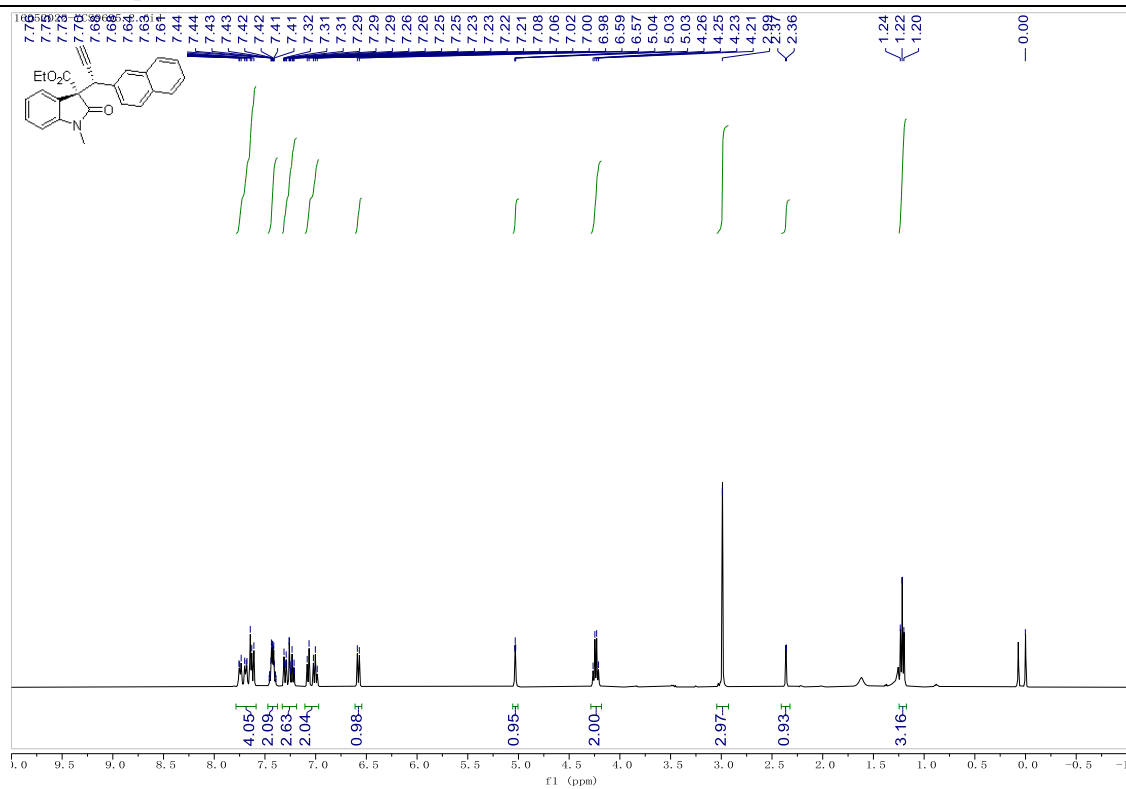

### <sup>13</sup>C NMR Spectrum of (*S,R*)-3I

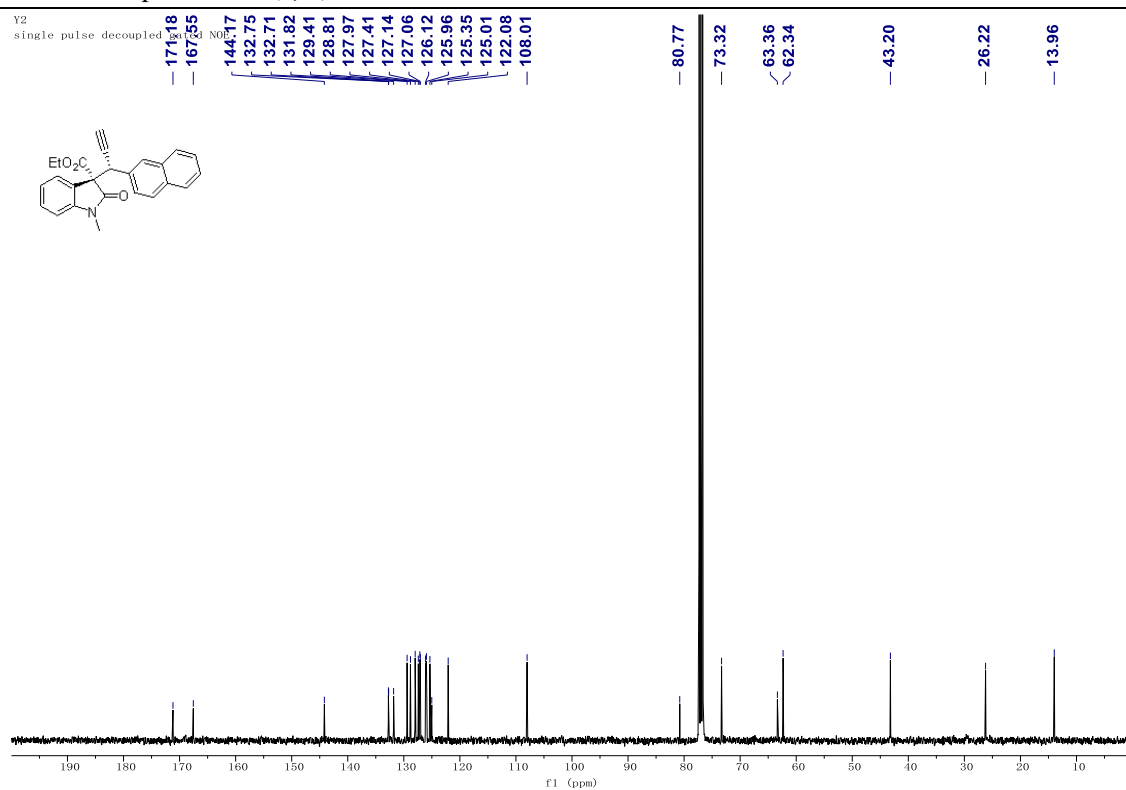

### <sup>1</sup>H NMR Spectrum of (*R,S*)-3m

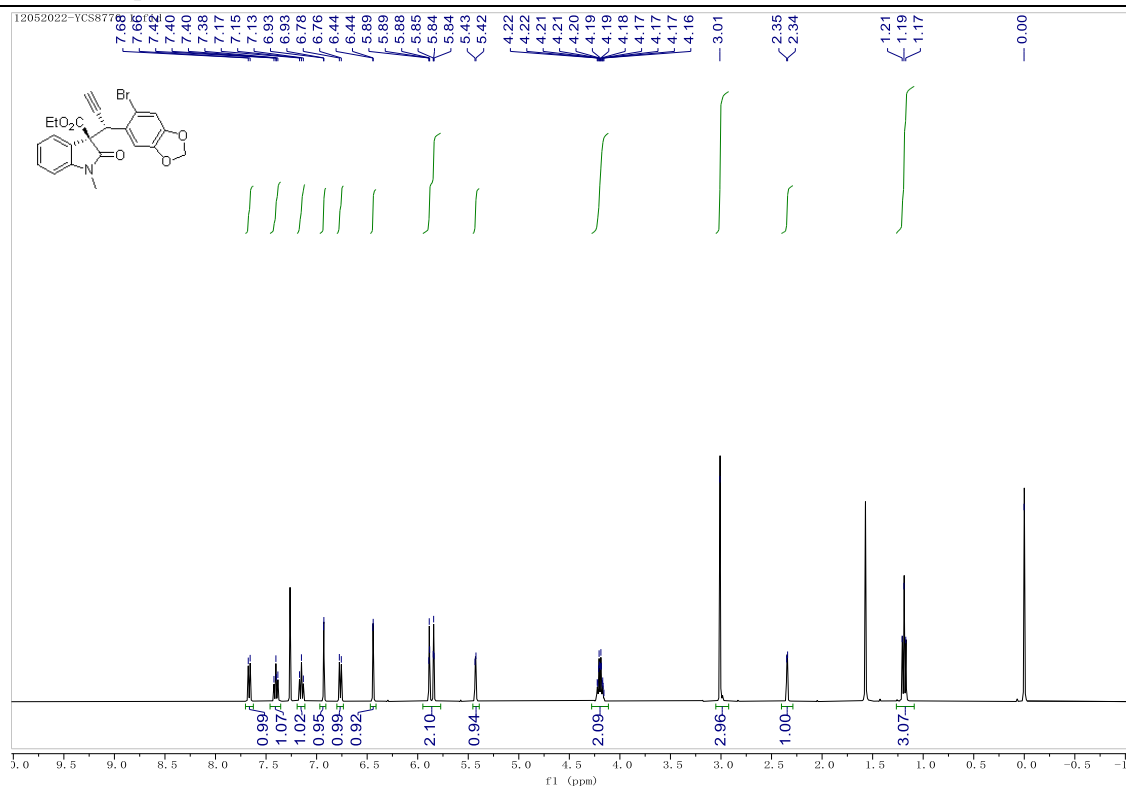

### <sup>13</sup>C NMR Spectrum of (*R,S*)-3m

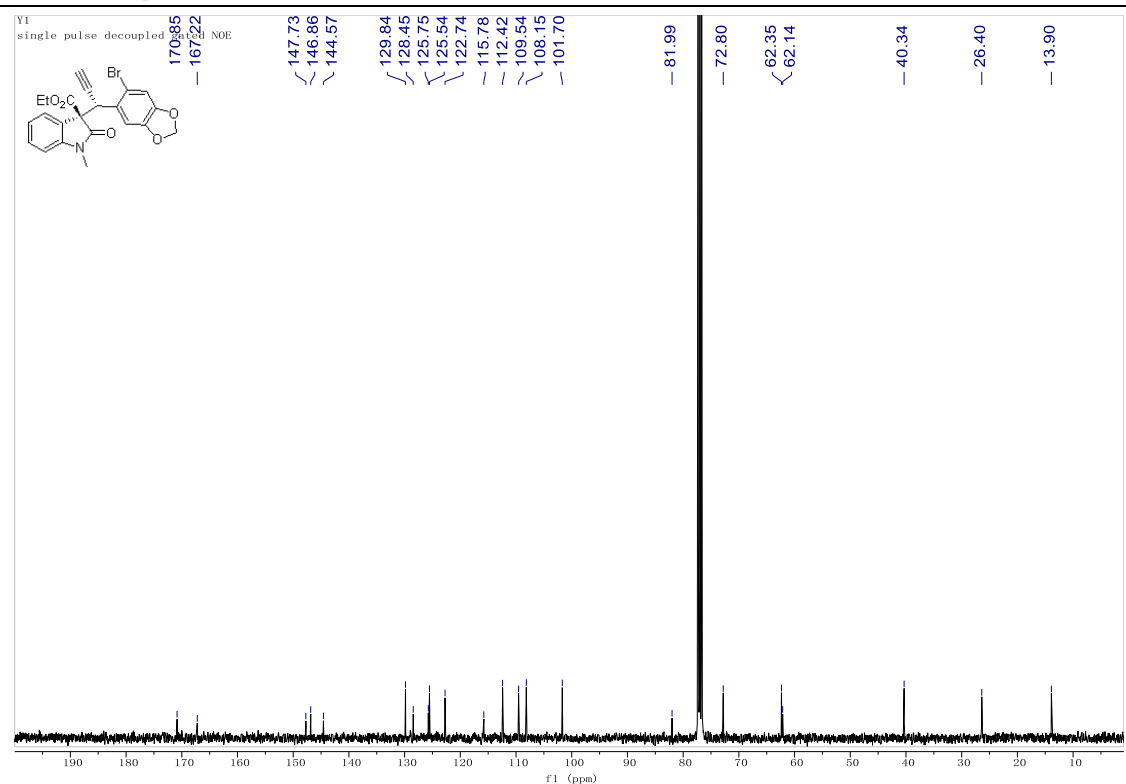



### <sup>1</sup>H NMR Spectrum of (*S,S*)-3m

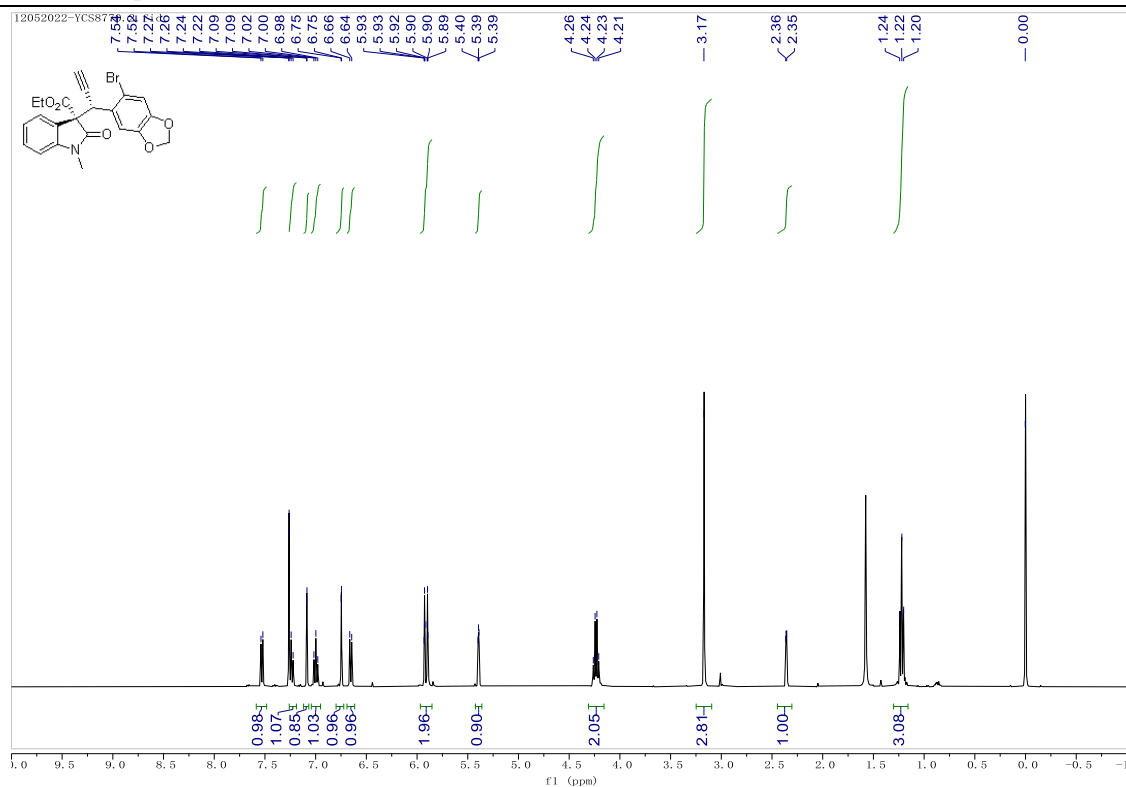

### <sup>13</sup>C NMR Spectrum of (*S,S*)-3m

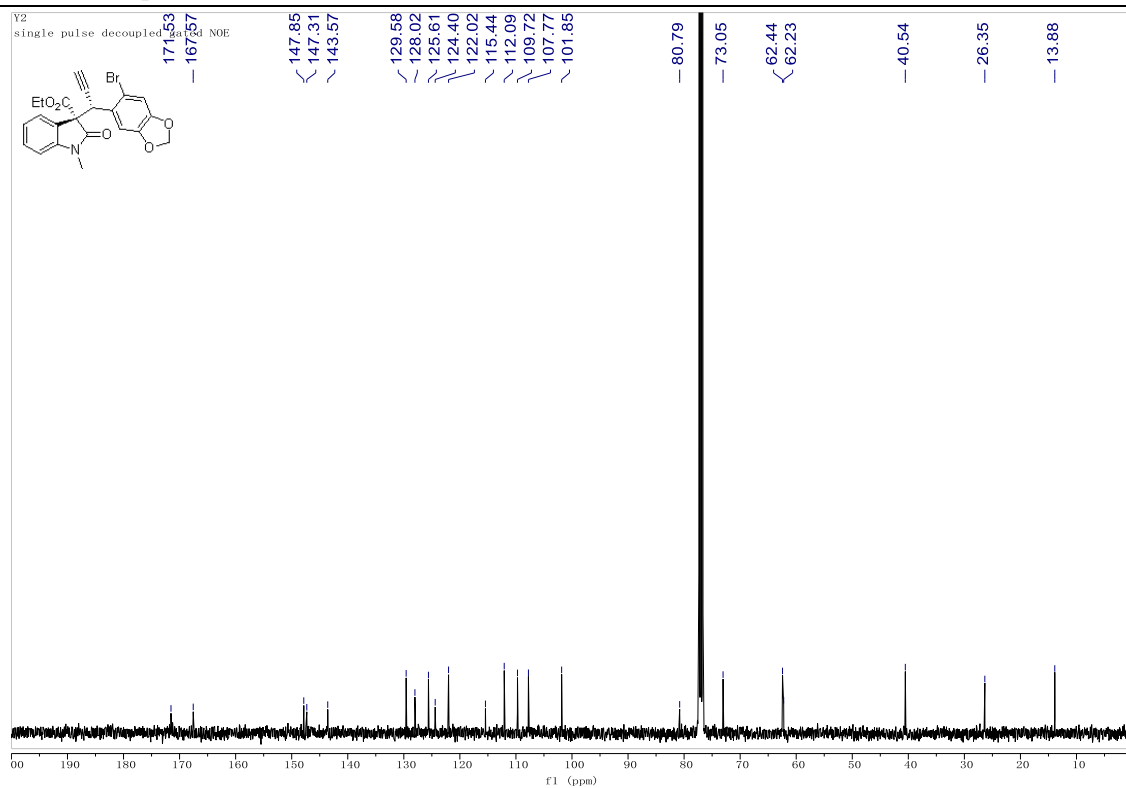

### <sup>1</sup>H NMR Spectrum of (*R,S*)-3n

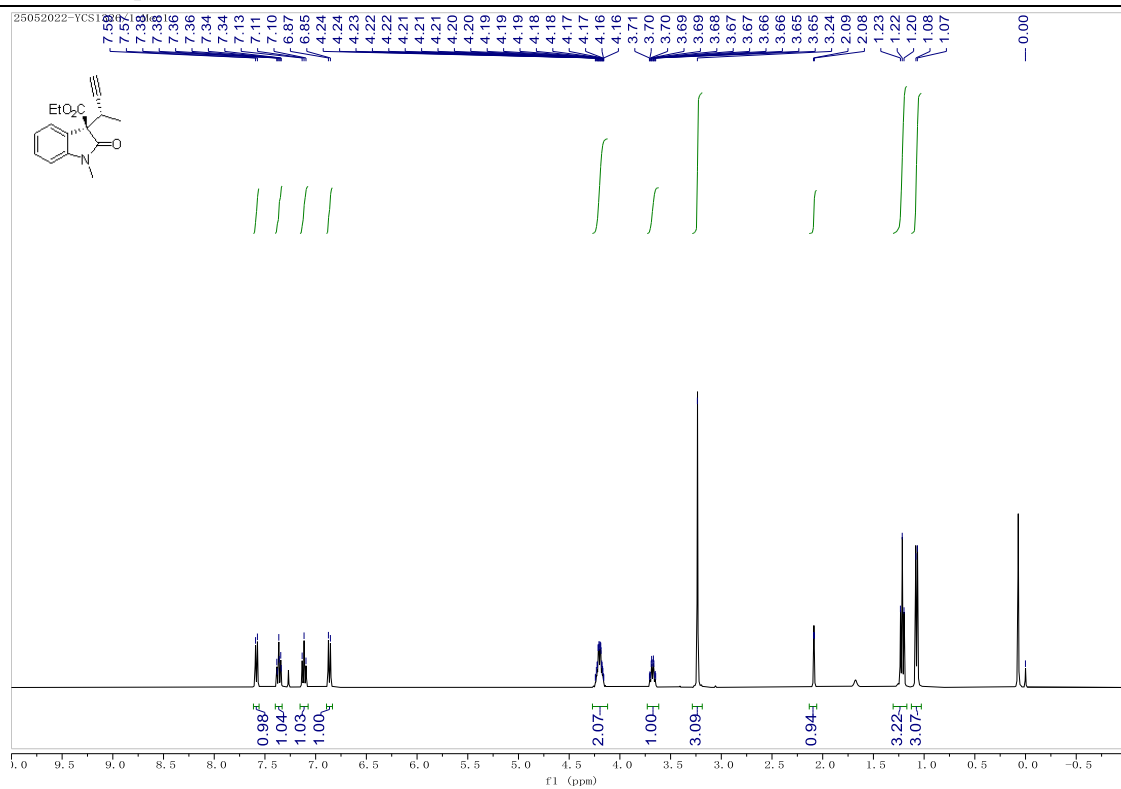

### <sup>13</sup>C NMR Spectrum of (*R,S*)-3n

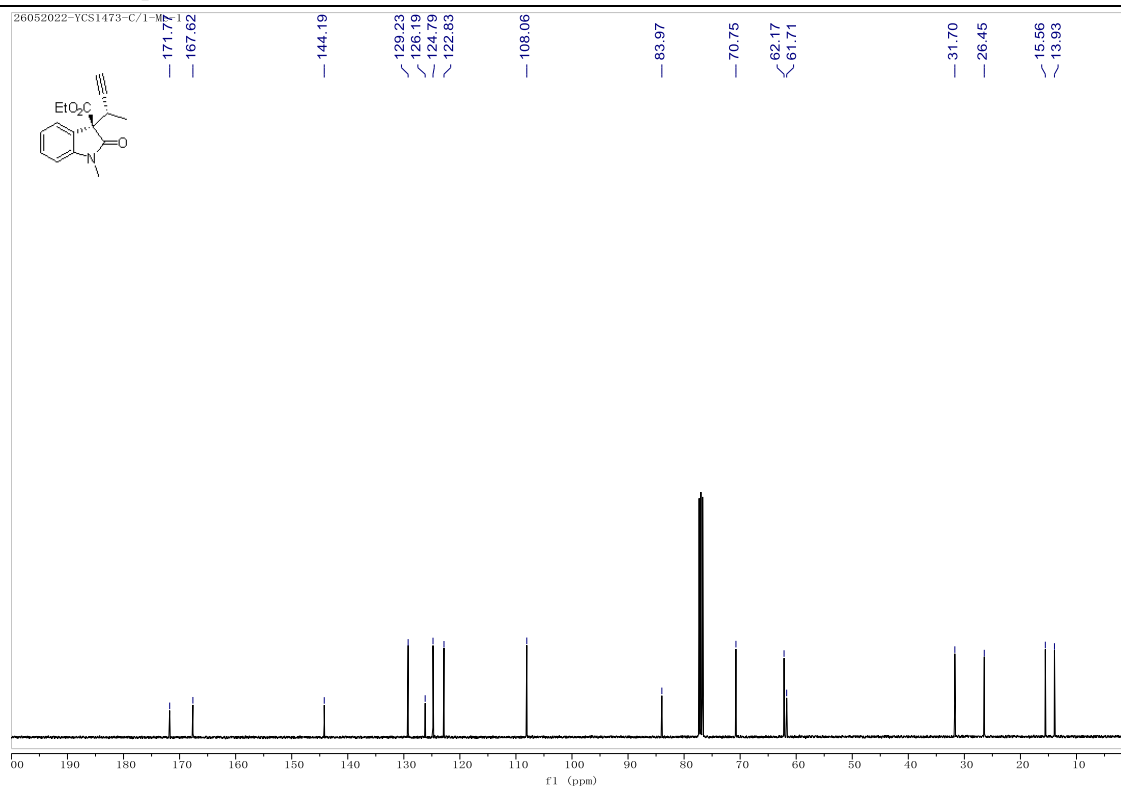

### <sup>1</sup>H NMR Spectrum of (S,S)-3n

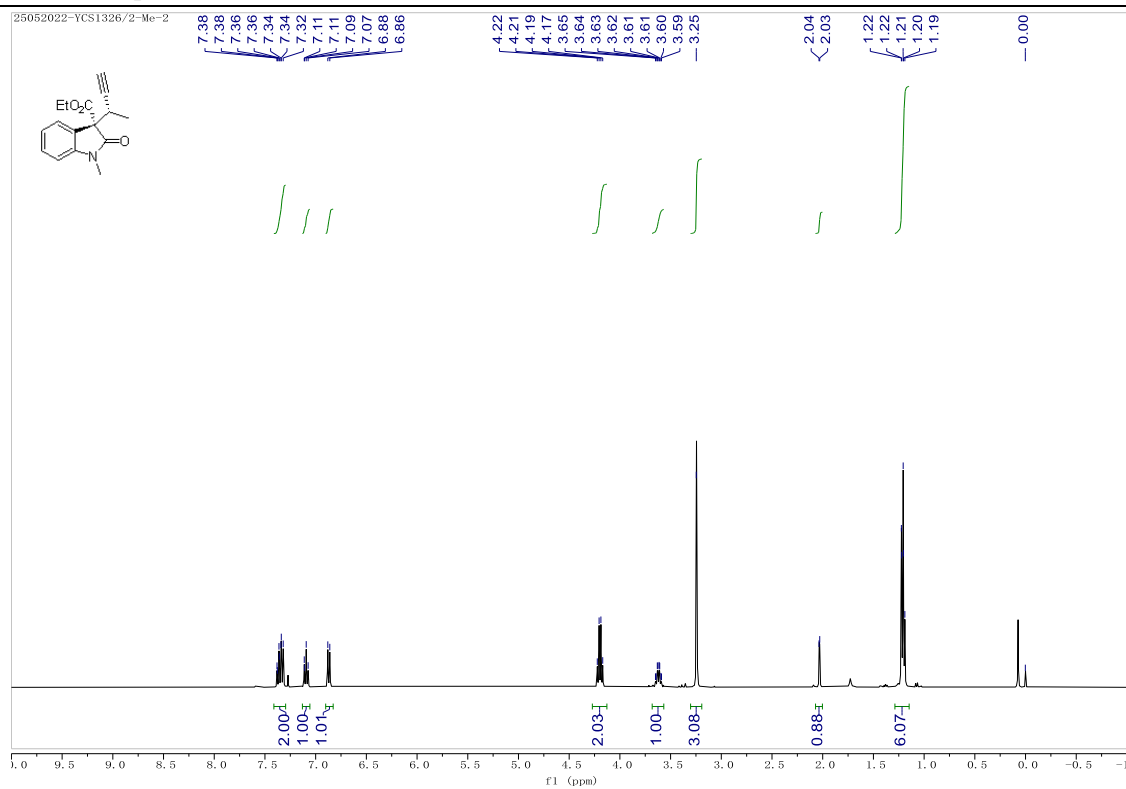

### <sup>13</sup>C NMR Spectrum of (S,S)-3n

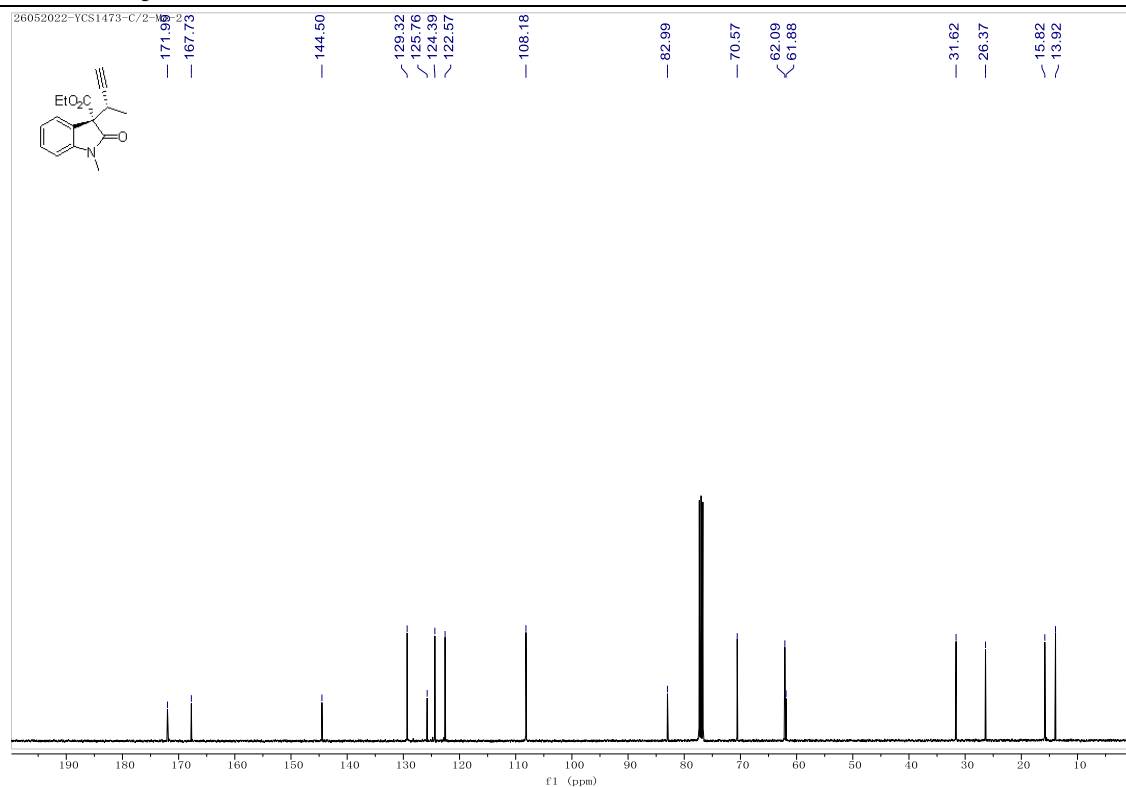

### <sup>1</sup>H NMR Spectrum of (*R,S*)-3o

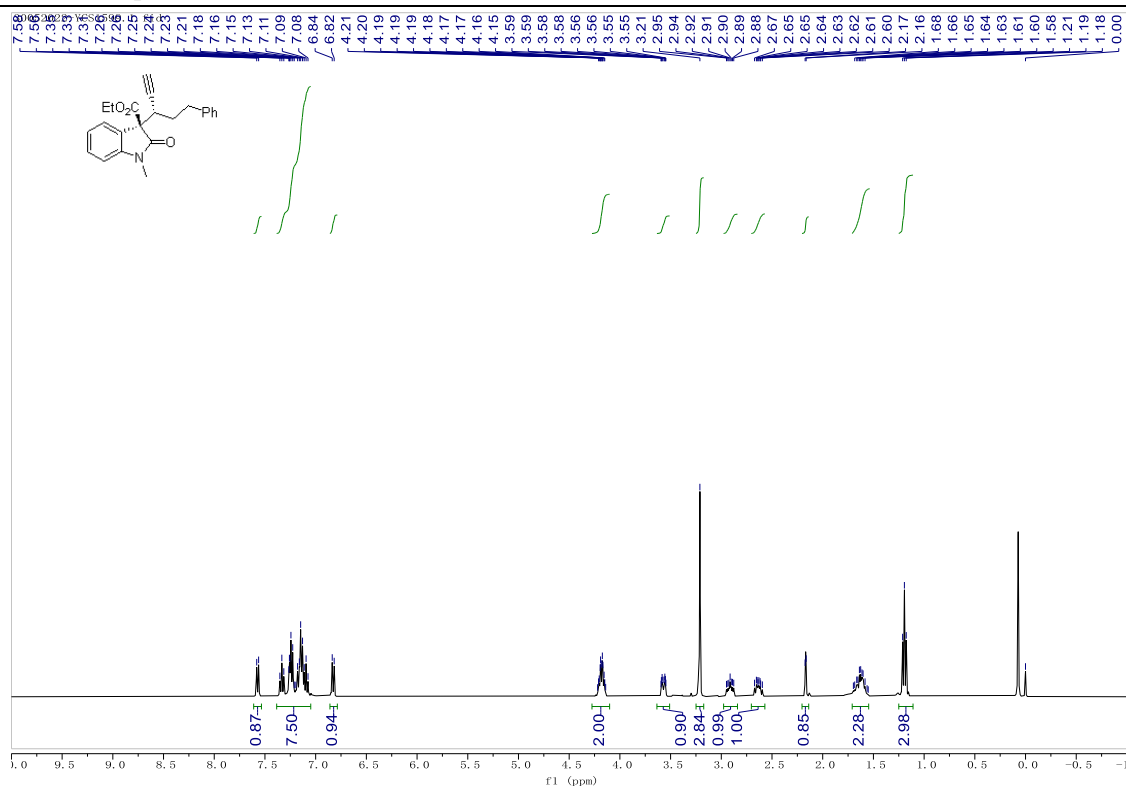

### <sup>13</sup>C NMR Spectrum of (*R,S*)-3o

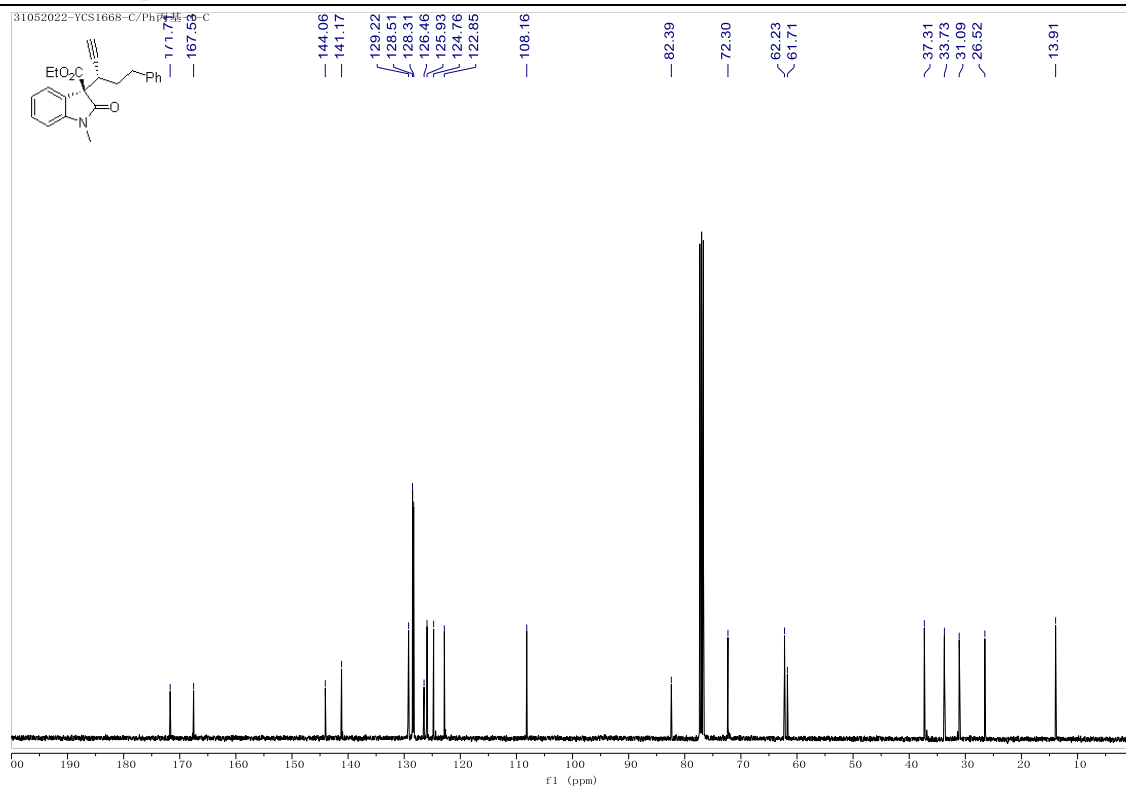

### <sup>1</sup>H NMR Spectrum of (*S,S*)-3o

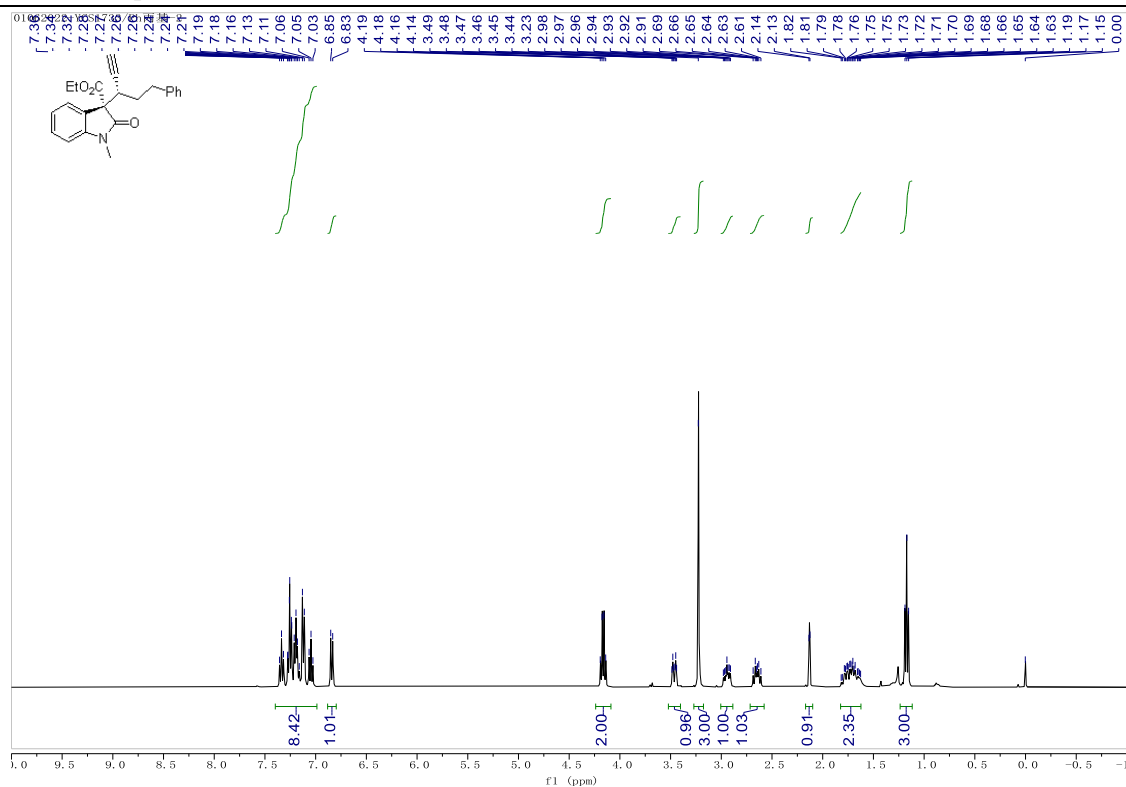

### <sup>13</sup>C NMR Spectrum of (*S,S*)-3o

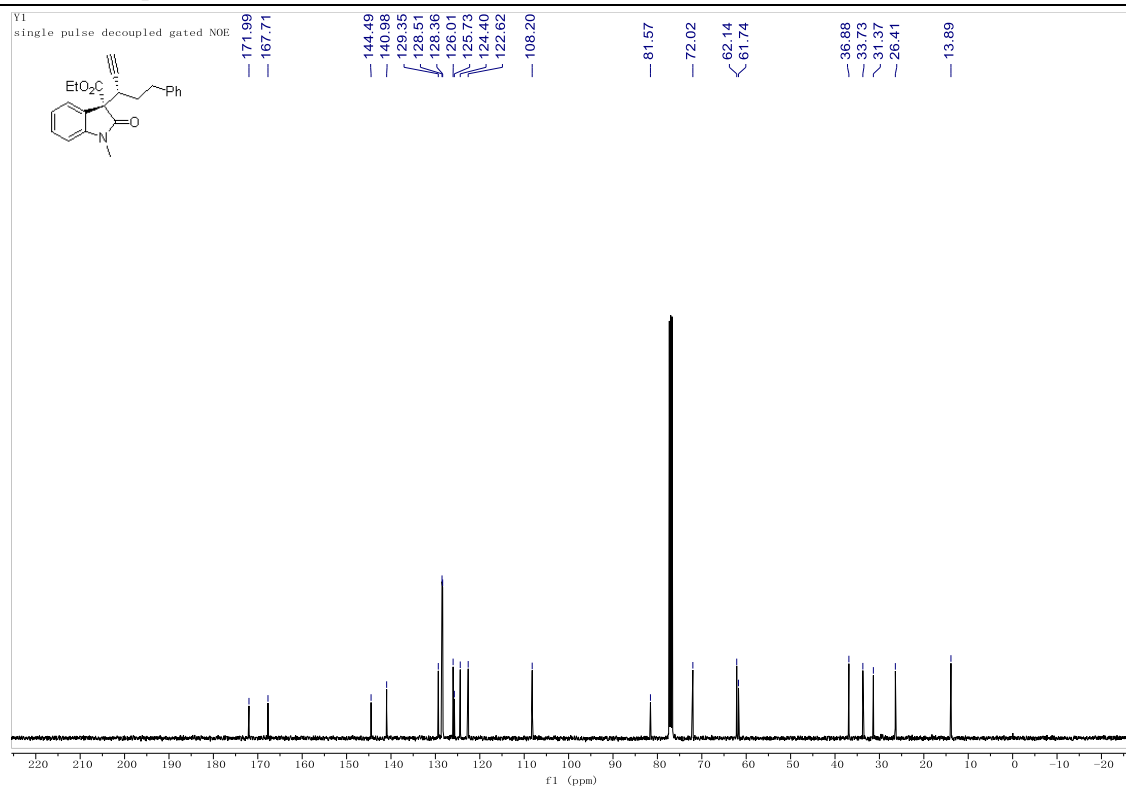

### <sup>1</sup>H NMR Spectrum of (*R,S*)-3p

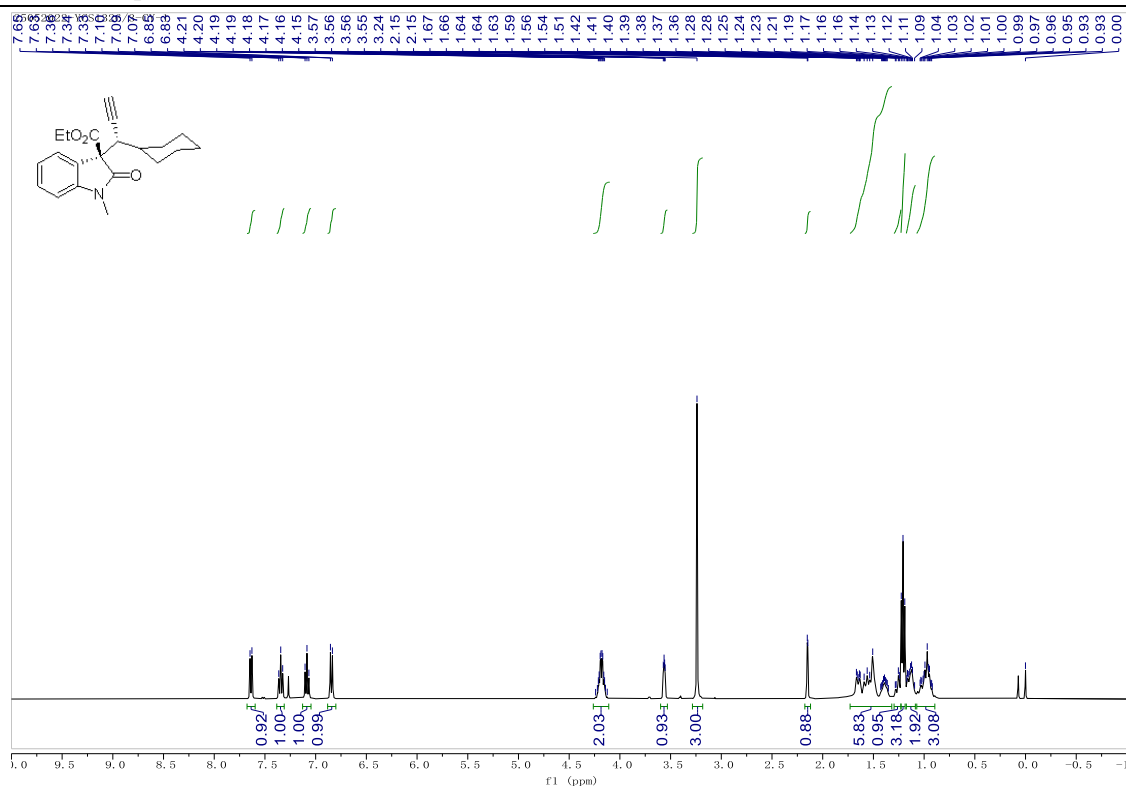

### <sup>13</sup>C NMR Spectrum of (*R,S*)-3p

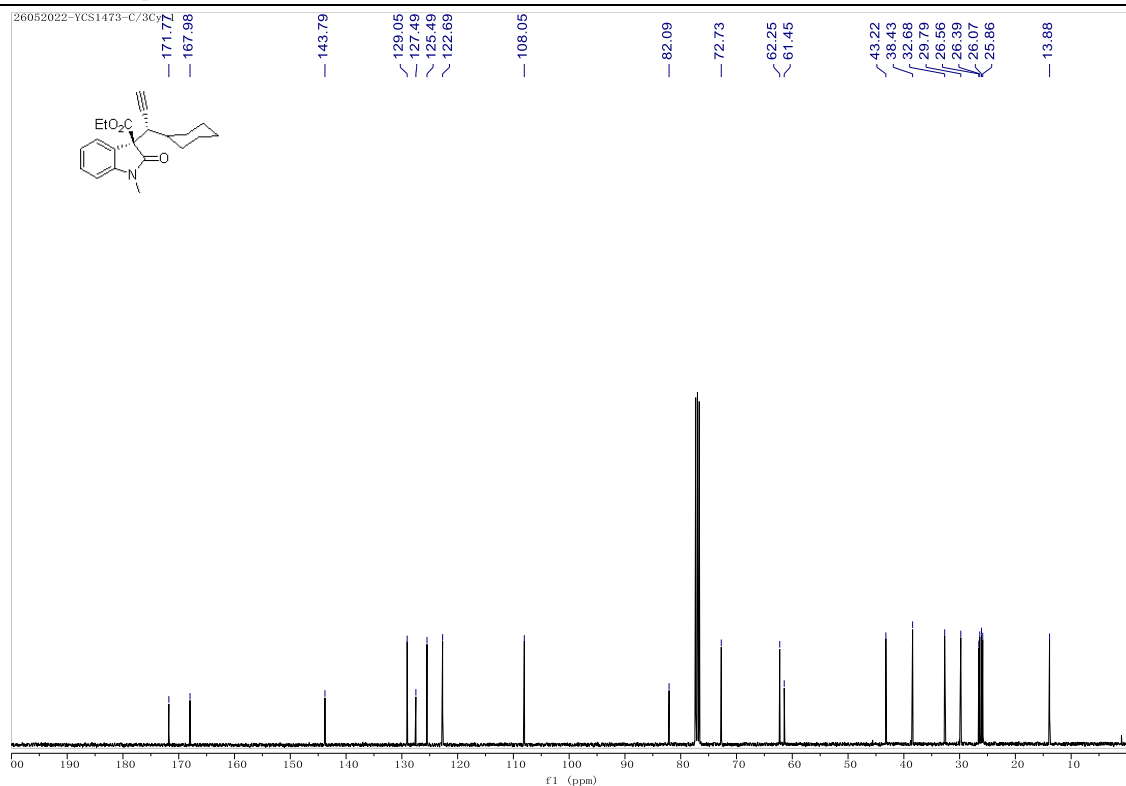

# <sup>1</sup>H NMR Spectrum of (S,S)-3p

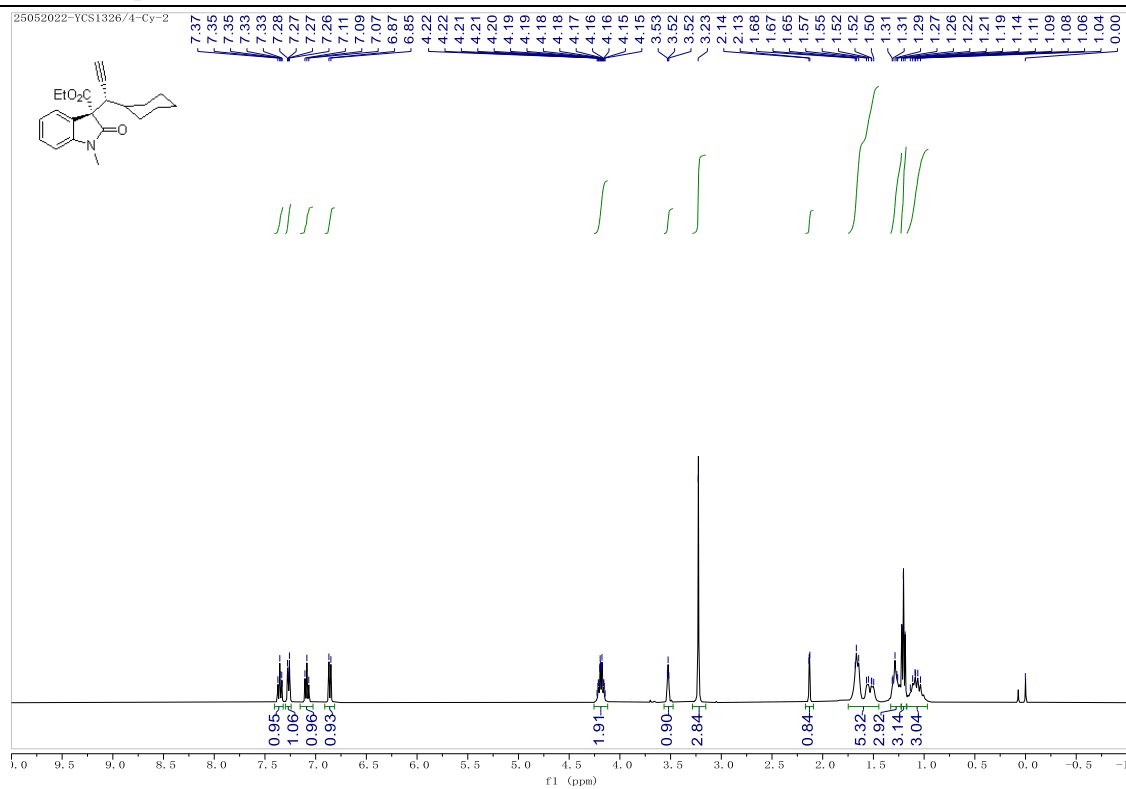

# <sup>13</sup>C NMR Spectrum of (S,S)-3p

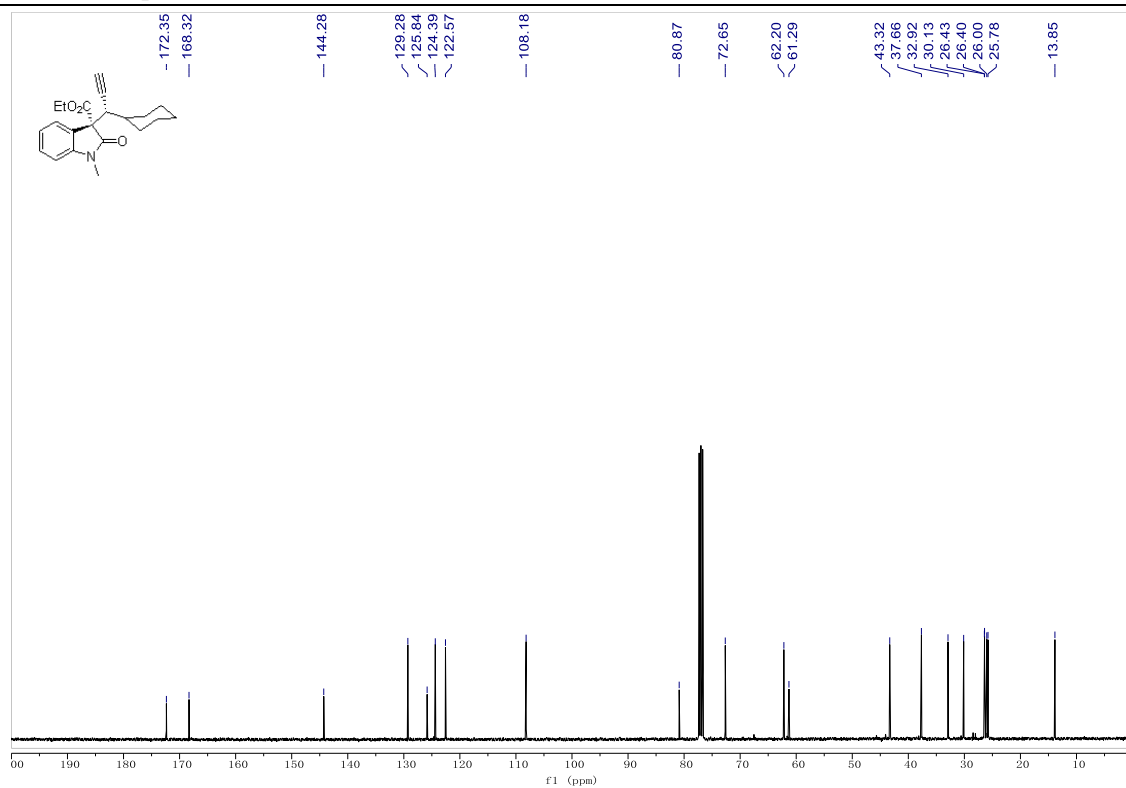

# <sup>1</sup>H NMR Spectrum of 4

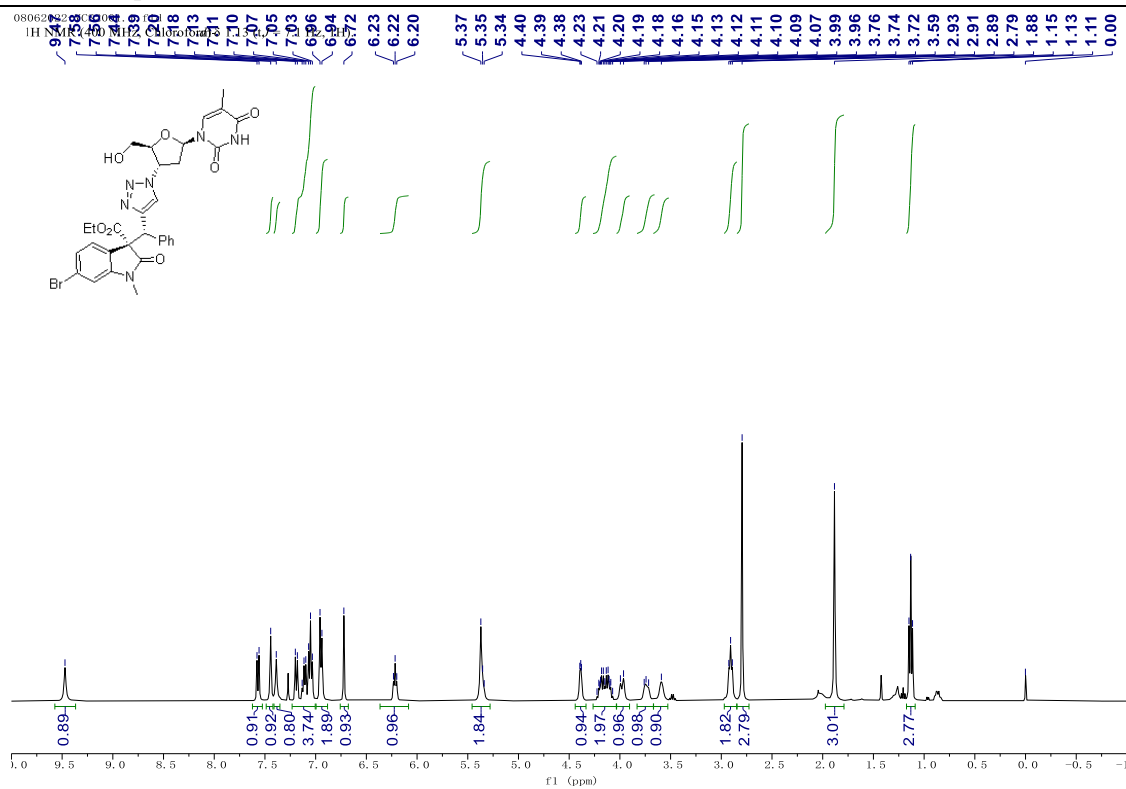

# <sup>13</sup>C NMR Spectrum of 4

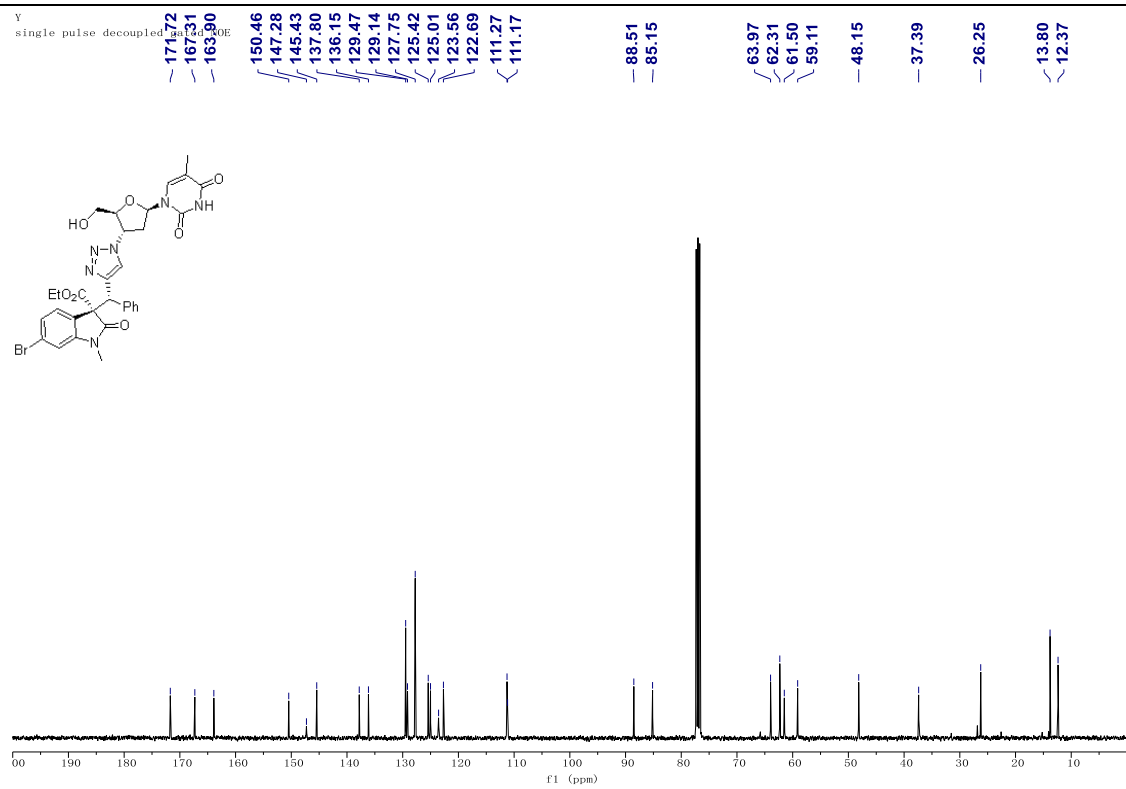



## 7. Copies of HPLC Chromatography

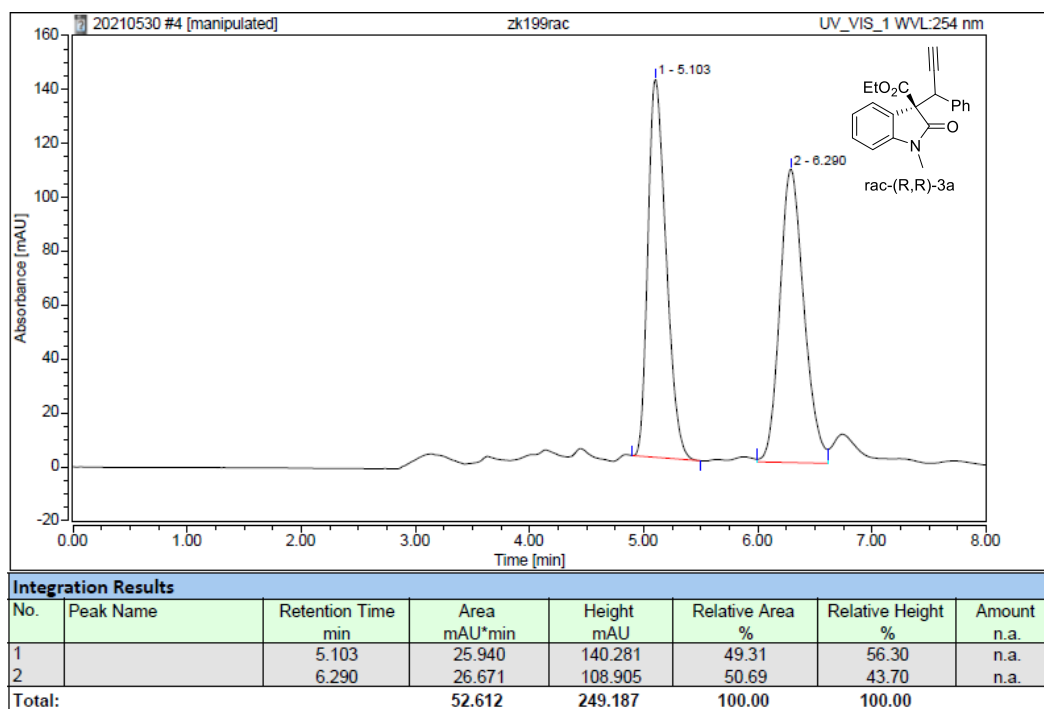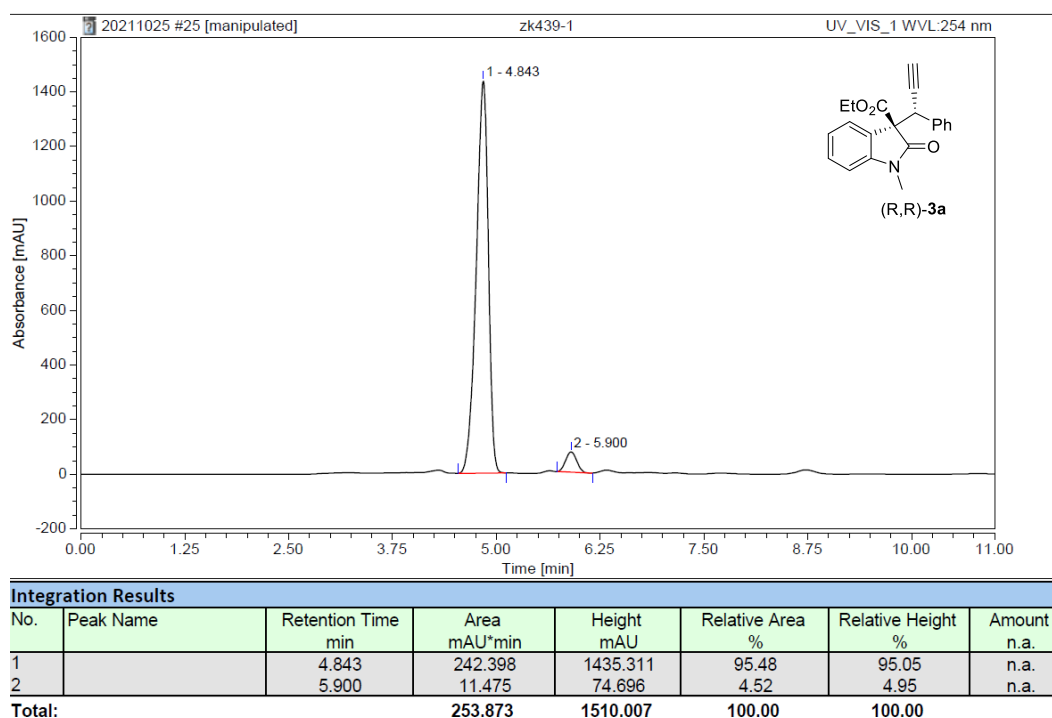

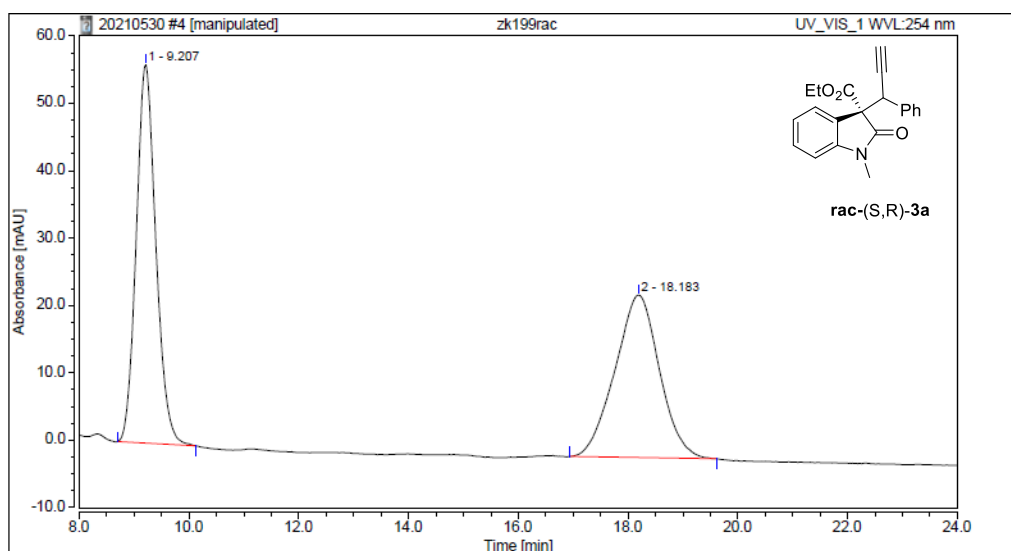

| Integration Results |           |                       |                 |               |                    |                      |                |
|---------------------|-----------|-----------------------|-----------------|---------------|--------------------|----------------------|----------------|
| No.                 | Peak Name | Retention Time<br>min | Area<br>mAU*min | Height<br>mAU | Relative Area<br>% | Relative Height<br>% | Amount<br>n.a. |
| 1                   |           | 9.207                 | 23.239          | 56.170        | 50.69              | 69.97                | n.a.           |
| 2                   |           | 18.183                | 22.609          | 24.103        | 49.31              | 30.03                | n.a.           |
| Total:              |           |                       | 45.848          | 80.274        | 100.00             | 100.00               |                |

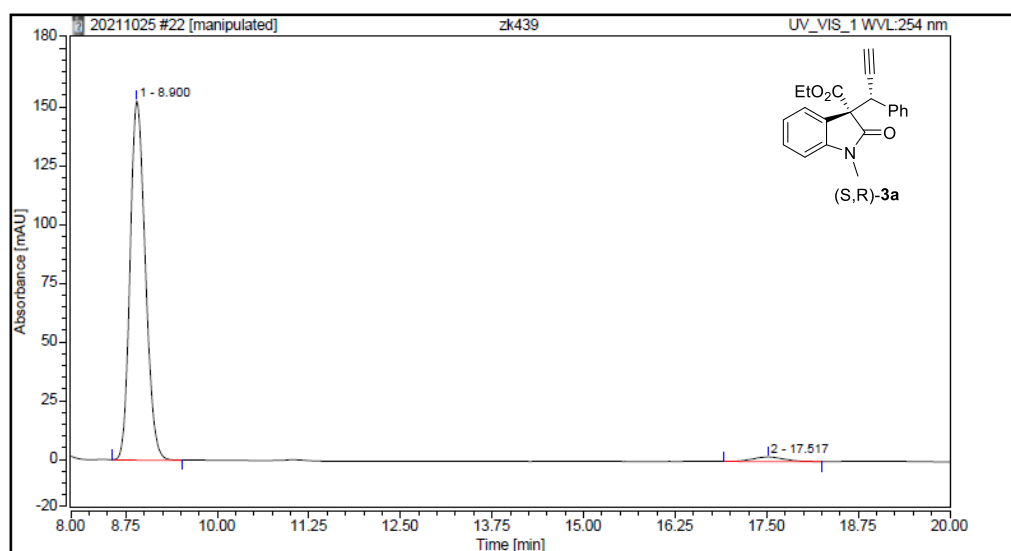

| Integration Results |           |                       |                 |               |                    |                      |                |
|---------------------|-----------|-----------------------|-----------------|---------------|--------------------|----------------------|----------------|
| No.                 | Peak Name | Retention Time<br>min | Area<br>mAU*min | Height<br>mAU | Relative Area<br>% | Relative Height<br>% | Amount<br>n.a. |
| 1                   |           | 8.900                 | 36.894          | 152.968       | 97.52              | 98.77                | n.a.           |
| 2                   |           | 17.517                | 0.940           | 1.907         | 2.48               | 1.23                 | n.a.           |
| Total:              |           |                       | 37.834          | 154.875       | 100.00             | 100.00               |                |

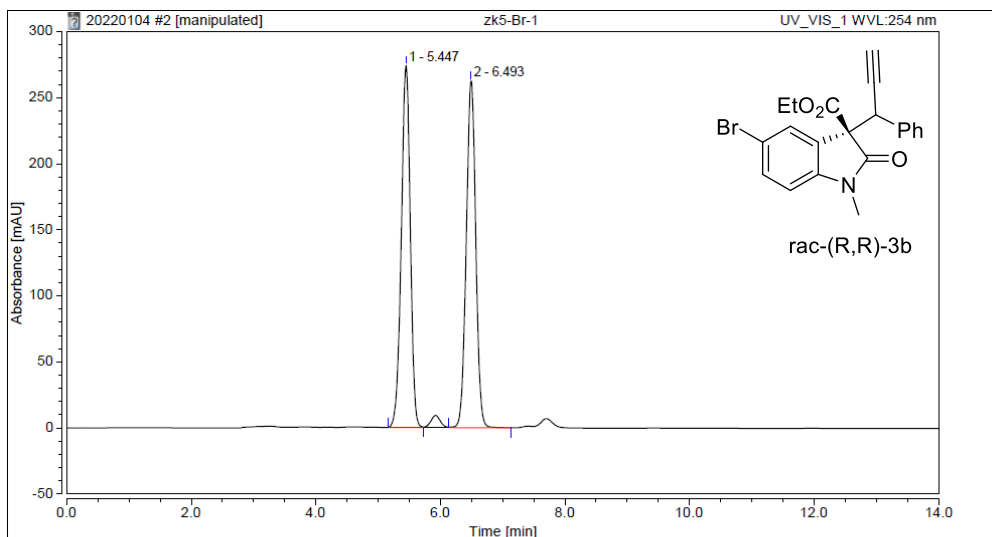

| Integration Results |           |                       |                 |                |                    |                      |                |
|---------------------|-----------|-----------------------|-----------------|----------------|--------------------|----------------------|----------------|
| No.                 | Peak Name | Retention Time<br>min | Area<br>mAU*min | Height<br>mAU  | Relative Area<br>% | Relative Height<br>% | Amount<br>n.a. |
| 1                   |           | 5.447                 | 45.896          | 274.050        | 49.76              | 51.06                | n.a.           |
| 2                   |           | 6.493                 | 46.343          | 262.692        | 50.24              | 48.94                | n.a.           |
| <b>Total:</b>       |           |                       | <b>92.240</b>   | <b>536.743</b> | <b>100.00</b>      | <b>100.00</b>        |                |

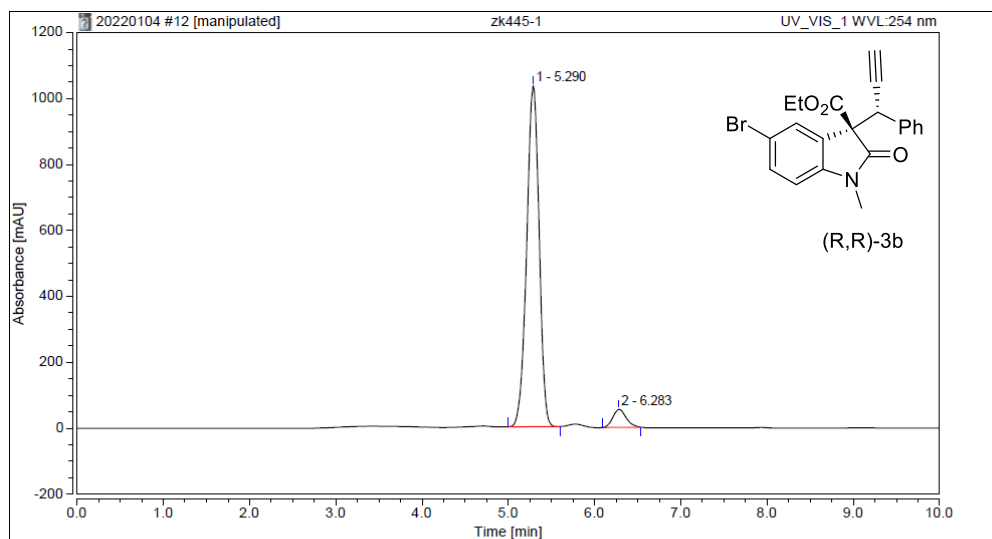

| Integration Results |           |                       |                 |                 |                    |                      |                |
|---------------------|-----------|-----------------------|-----------------|-----------------|--------------------|----------------------|----------------|
| No.                 | Peak Name | Retention Time<br>min | Area<br>mAU*min | Height<br>mAU   | Relative Area<br>% | Relative Height<br>% | Amount<br>n.a. |
| 1                   |           | 5.290                 | 173.148         | 1034.111        | 94.71              | 95.02                | n.a.           |
| 2                   |           | 6.283                 | 9.680           | 54.197          | 5.29               | 4.98                 | n.a.           |
| <b>Total:</b>       |           |                       | <b>182.828</b>  | <b>1088.308</b> | <b>100.00</b>      | <b>100.00</b>        |                |

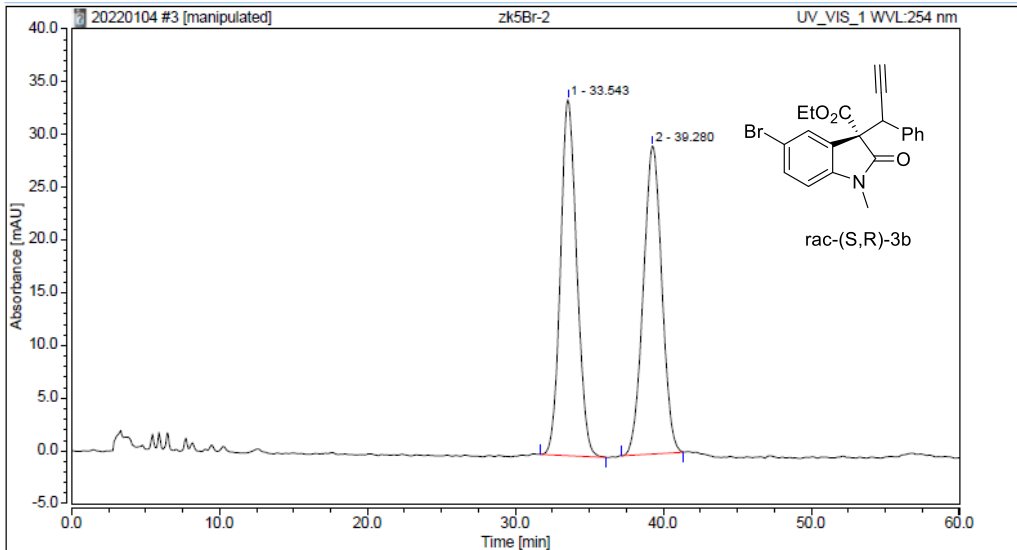

| Integration Results |           |                    |              |            |                 |                   |        |
|---------------------|-----------|--------------------|--------------|------------|-----------------|-------------------|--------|
| No.                 | Peak Name | Retention Time min | Area mAU*min | Height mAU | Relative Area % | Relative Height % | Amount |
| 1                   |           | 33.543             | 43.118       | 33.758     | 50.48           | 53.60             | n.a.   |
| 2                   |           | 39.280             | 42.302       | 29.222     | 49.52           | 46.40             | n.a.   |
| Total:              |           |                    | 85.420       | 62.980     | 100.00          | 100.00            |        |

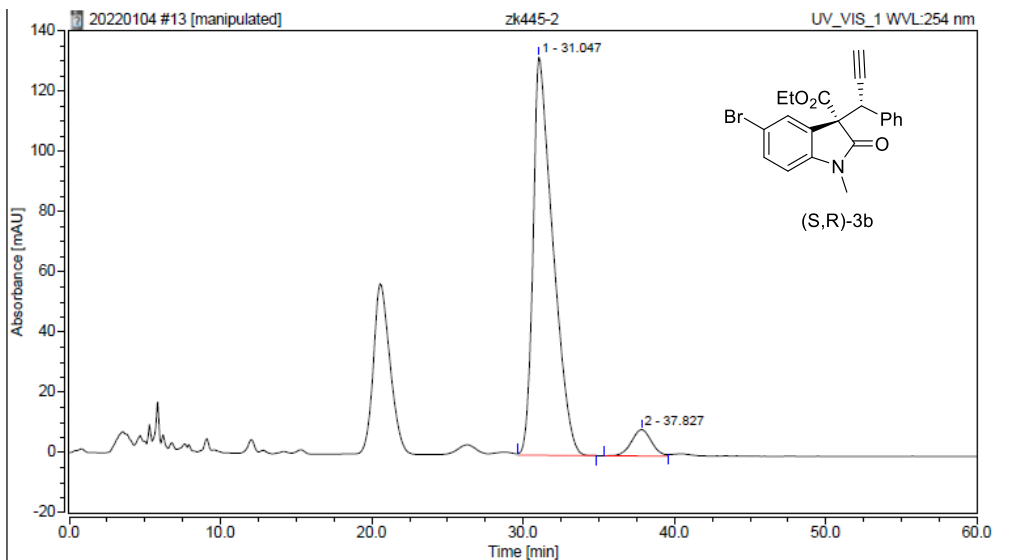

| Integration Results |           |                    |              |            |                 |                   |        |
|---------------------|-----------|--------------------|--------------|------------|-----------------|-------------------|--------|
| No.                 | Peak Name | Retention Time min | Area mAU*min | Height mAU | Relative Area % | Relative Height % | Amount |
| 1                   |           | 31.047             | 201.193      | 132.220    | 93.76           | 93.81             | n.a.   |
| 2                   |           | 37.827             | 13.393       | 8.729      | 6.24            | 6.19              | n.a.   |
| Total:              |           |                    | 214.586      | 140.948    | 100.00          | 100.00            |        |

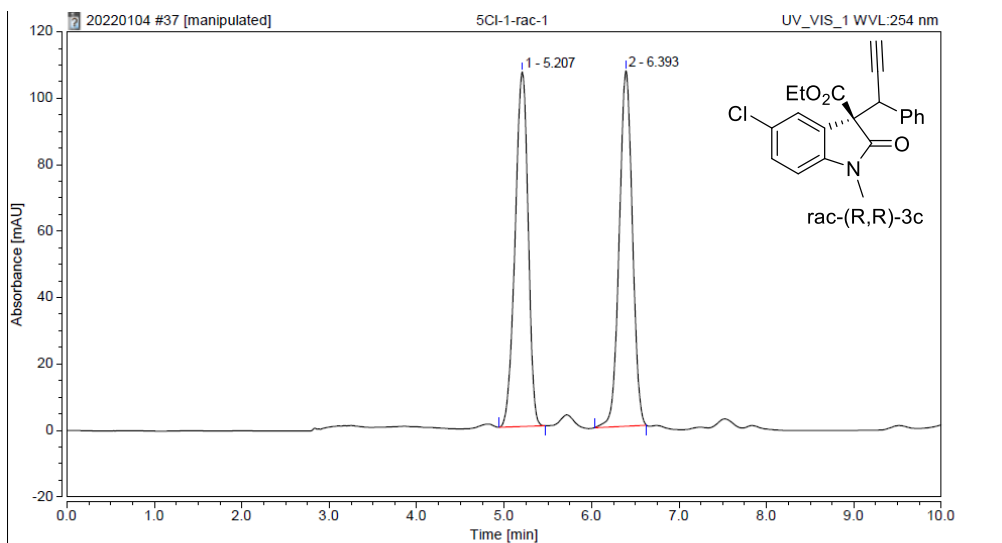

**Integration Results**

| No.           | Peak Name | Retention Time<br>min | Area<br>mAU*min | Height<br>mAU  | Relative Area<br>% | Relative Height<br>% | Amount<br>n.a. |
|---------------|-----------|-----------------------|-----------------|----------------|--------------------|----------------------|----------------|
| 1             |           | 5.207                 | 18.382          | 106.744        | 49.64              | 49.94                | n.a.           |
| 2             |           | 6.393                 | 18.645          | 107.015        | 50.36              | 50.06                | n.a.           |
| <b>Total:</b> |           |                       | <b>37.027</b>   | <b>213.759</b> | <b>100.00</b>      | <b>100.00</b>        |                |

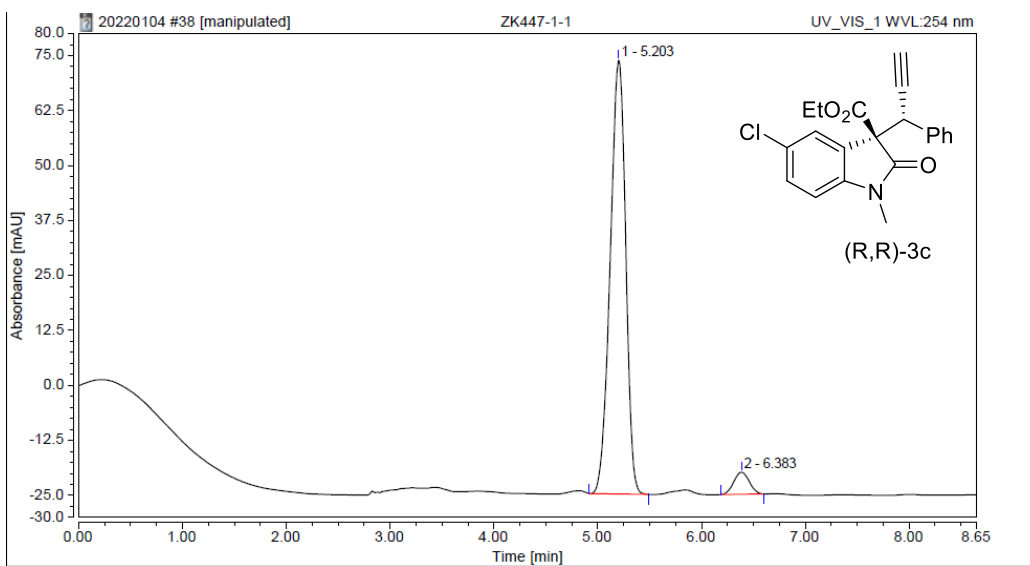

**Integration Results**

| No.           | Peak Name | Retention Time<br>min | Area<br>mAU*min | Height<br>mAU  | Relative Area<br>% | Relative Height<br>% | Amount<br>n.a. |
|---------------|-----------|-----------------------|-----------------|----------------|--------------------|----------------------|----------------|
| 1             |           | 5.203                 | 17.021          | 98.639         | 95.15              | 95.14                | n.a.           |
| 2             |           | 6.383                 | 0.868           | 5.039          | 4.85               | 4.86                 | n.a.           |
| <b>Total:</b> |           |                       | <b>17.888</b>   | <b>103.678</b> | <b>100.00</b>      | <b>100.00</b>        |                |

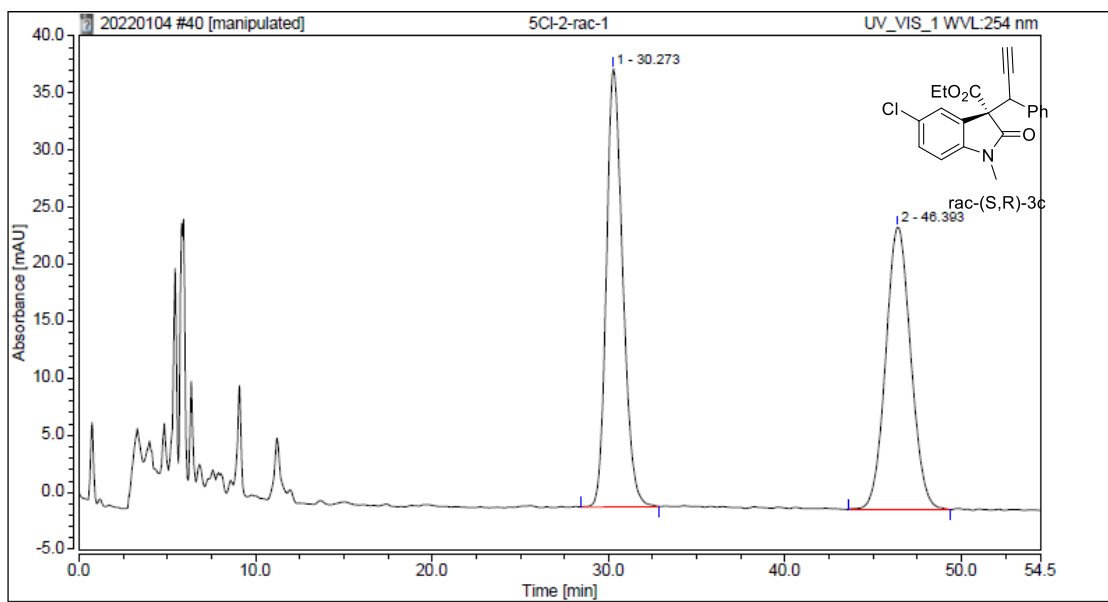

**Integration Results**

| No.           | Peak Name | Retention Time min | Area mAU*min  | Height mAU    | Relative Area % | Relative Height % | Amount n.a. |
|---------------|-----------|--------------------|---------------|---------------|-----------------|-------------------|-------------|
| 1             |           | 30.273             | 41.281        | 38.400        | 50.29           | 60.79             | n.a.        |
| 2             |           | 46.393             | 40.809        | 24.771        | 49.71           | 39.21             | n.a.        |
| <b>Total:</b> |           |                    | <b>82.089</b> | <b>63.171</b> | <b>100.00</b>   | <b>100.00</b>     |             |

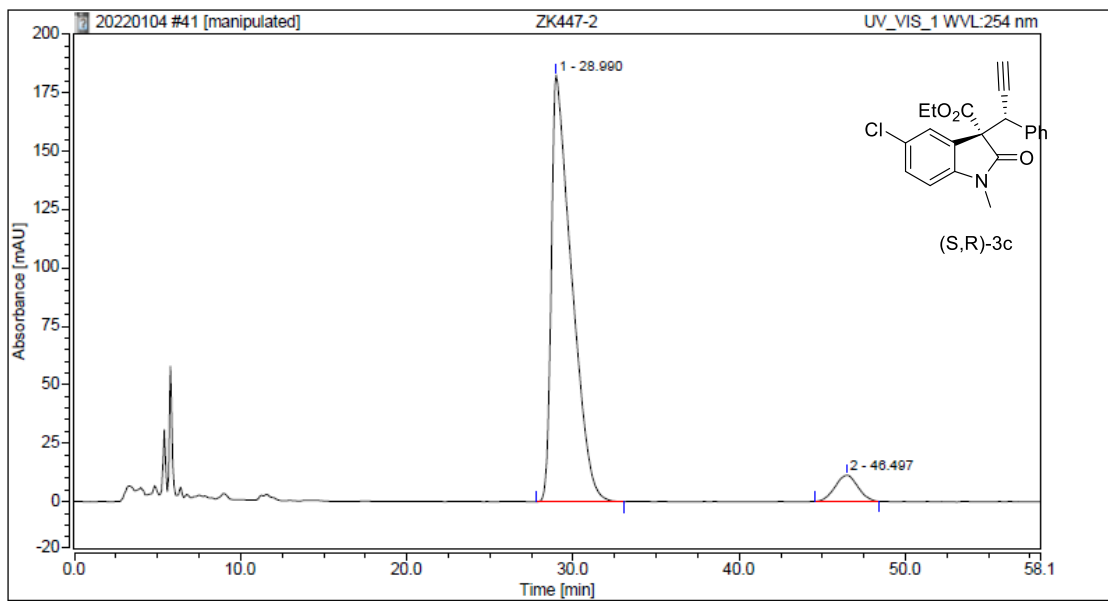

**Integration Results**

| No.           | Peak Name | Retention Time min | Area mAU*min   | Height mAU     | Relative Area % | Relative Height % | Amount n.a. |
|---------------|-----------|--------------------|----------------|----------------|-----------------|-------------------|-------------|
| 1             |           | 28.990             | 257.042        | 182.617        | 93.51           | 94.22             | n.a.        |
| 2             |           | 46.497             | 17.836         | 11.199         | 6.49            | 5.78              | n.a.        |
| <b>Total:</b> |           |                    | <b>274.878</b> | <b>193.816</b> | <b>100.00</b>   | <b>100.00</b>     |             |

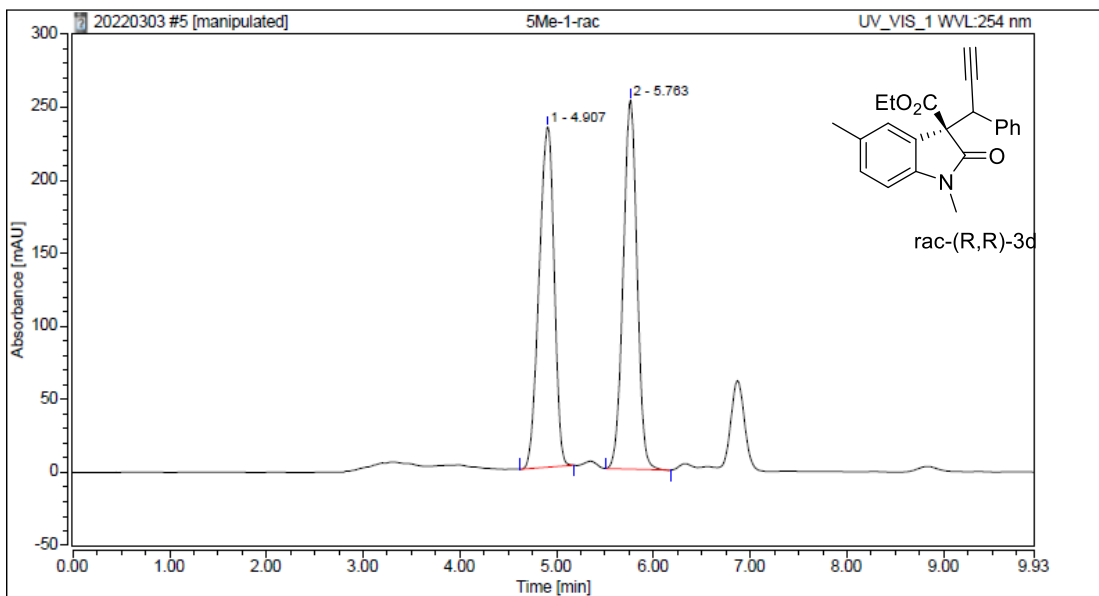

**Integration Results**

| No.           | Peak Name | Retention Time<br>min | Area<br>mAU*min | Height<br>mAU  | Relative Area<br>% | Relative Height<br>% | Amount<br>n.a. |
|---------------|-----------|-----------------------|-----------------|----------------|--------------------|----------------------|----------------|
| 1             |           | 4.907                 | 42.024          | 232.925        | 50.04              | 47.97                | n.a.           |
| 2             |           | 5.763                 | 41.965          | 252.606        | 49.96              | 52.03                | n.a.           |
| <b>Total:</b> |           |                       | <b>83.989</b>   | <b>485.531</b> | <b>100.00</b>      | <b>100.00</b>        |                |

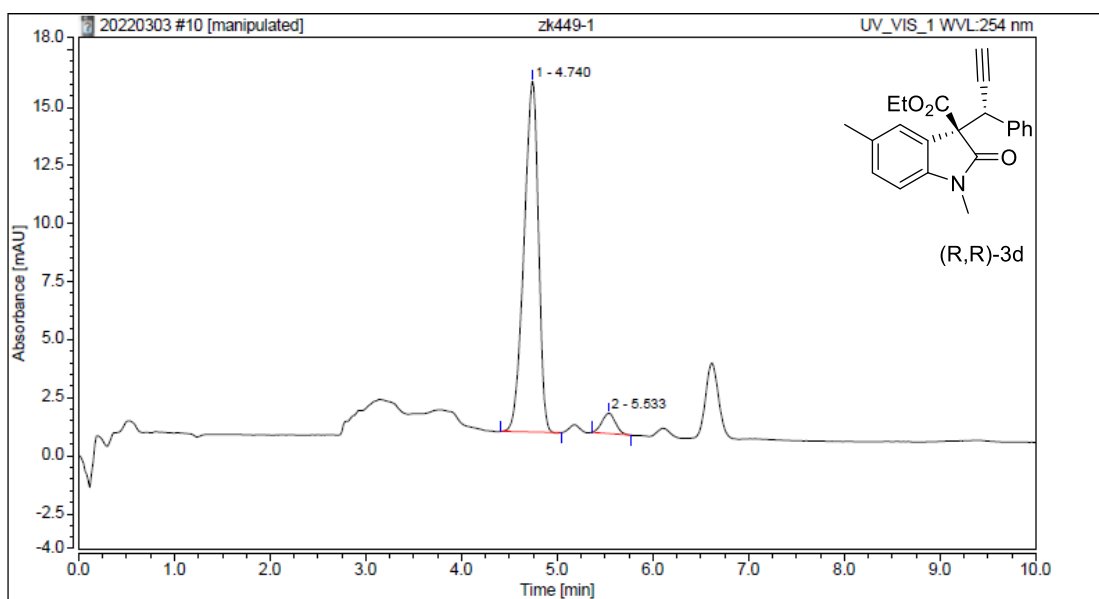

**Integration Results**

| No.           | Peak Name | Retention Time<br>min | Area<br>mAU*min | Height<br>mAU | Relative Area<br>% | Relative Height<br>% | Amount<br>n.a. |
|---------------|-----------|-----------------------|-----------------|---------------|--------------------|----------------------|----------------|
| 1             |           | 4.740                 | 2.630           | 15.098        | 94.88              | 94.52                | n.a.           |
| 2             |           | 5.533                 | 0.142           | 0.875         | 5.12               | 5.48                 | n.a.           |
| <b>Total:</b> |           |                       | <b>2.772</b>    | <b>15.973</b> | <b>100.00</b>      | <b>100.00</b>        |                |

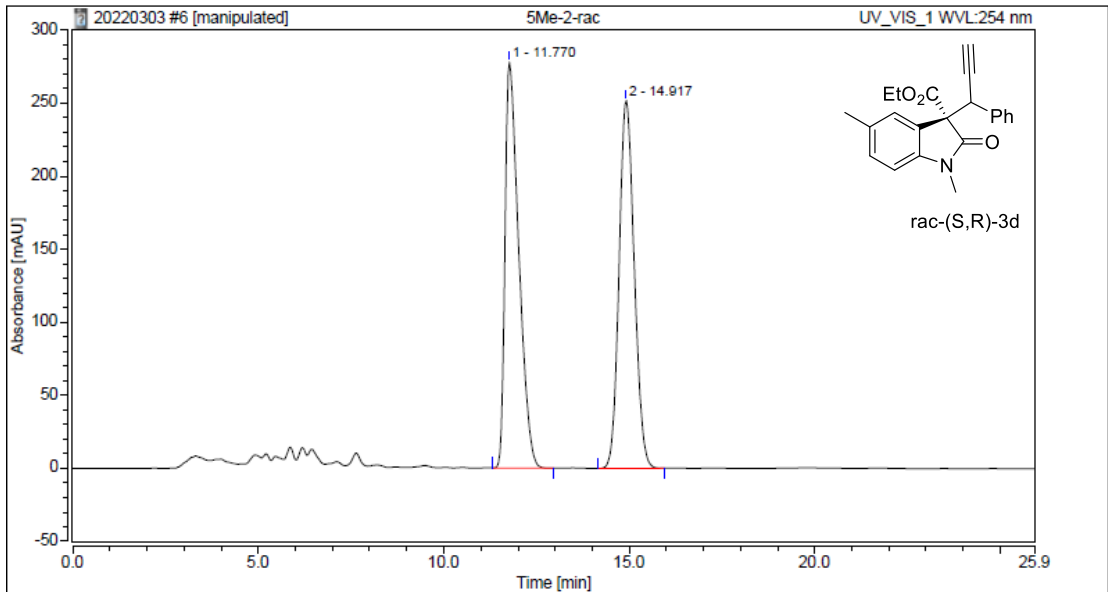

**Integration Results**

| No.           | Peak Name | Retention Time min | Area mAU*min   | Height mAU     | Relative Area % | Relative Height % | Amount n.a. |
|---------------|-----------|--------------------|----------------|----------------|-----------------|-------------------|-------------|
| 1             |           | 11.770             | 119.368        | 277.889        | 50.00           | 52.44             | n.a.        |
| 2             |           | 14.917             | 119.388        | 251.991        | 50.00           | 47.56             | n.a.        |
| <b>Total:</b> |           |                    | <b>238.756</b> | <b>529.880</b> | <b>100.00</b>   | <b>100.00</b>     |             |

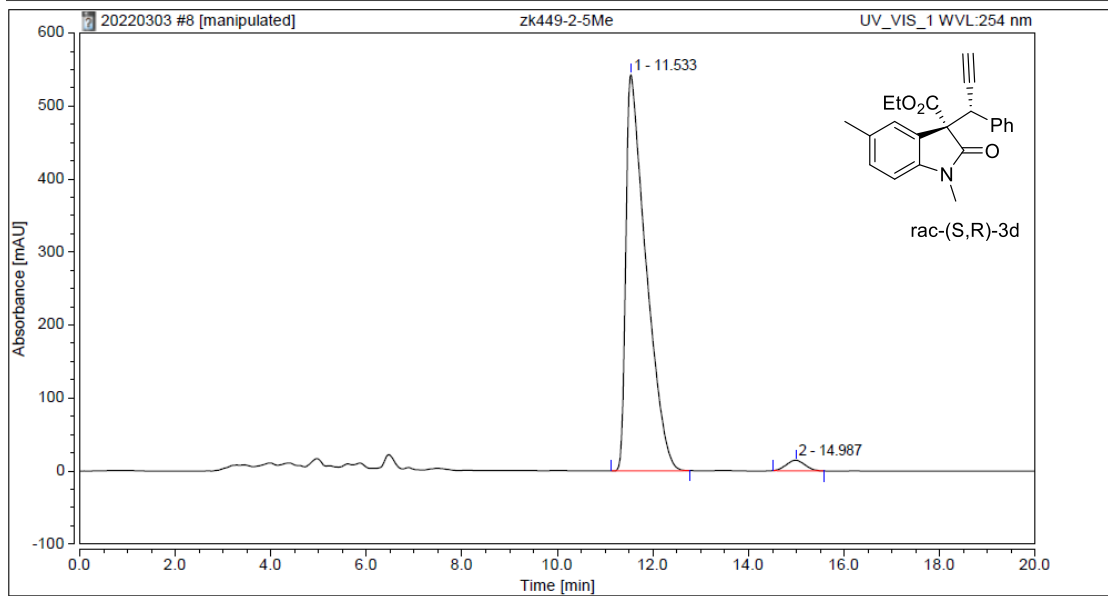

**Integration Results**

| No.           | Peak Name | Retention Time min | Area mAU*min   | Height mAU     | Relative Area % | Relative Height % | Amount n.a. |
|---------------|-----------|--------------------|----------------|----------------|-----------------|-------------------|-------------|
| 1             |           | 11.533             | 263.518        | 542.591        | 97.57           | 97.41             | n.a.        |
| 2             |           | 14.987             | 6.568          | 14.410         | 2.43            | 2.59              | n.a.        |
| <b>Total:</b> |           |                    | <b>270.085</b> | <b>557.001</b> | <b>100.00</b>   | <b>100.00</b>     |             |



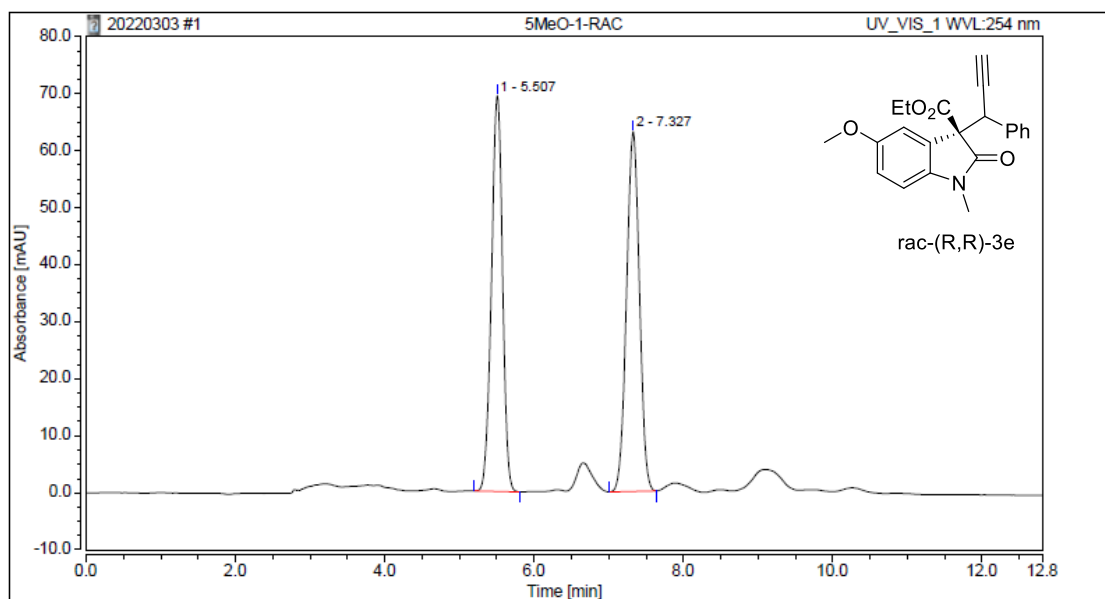

| Integration Results |           |                       |                 |               |                    |                      |                |
|---------------------|-----------|-----------------------|-----------------|---------------|--------------------|----------------------|----------------|
| No.                 | Peak Name | Retention Time<br>min | Area<br>mAU*min | Height<br>mAU | Relative Area<br>% | Relative Height<br>% | Amount<br>n.a. |
| 1                   |           | 5.507                 | 11.906          | 69.395        | 48.57              | 52.36                | n.a.           |
| 2                   |           | 7.327                 | 12.608          | 63.130        | 51.43              | 47.64                | n.a.           |
| Total:              |           |                       | 24.514          | 132.524       | 100.00             | 100.00               |                |

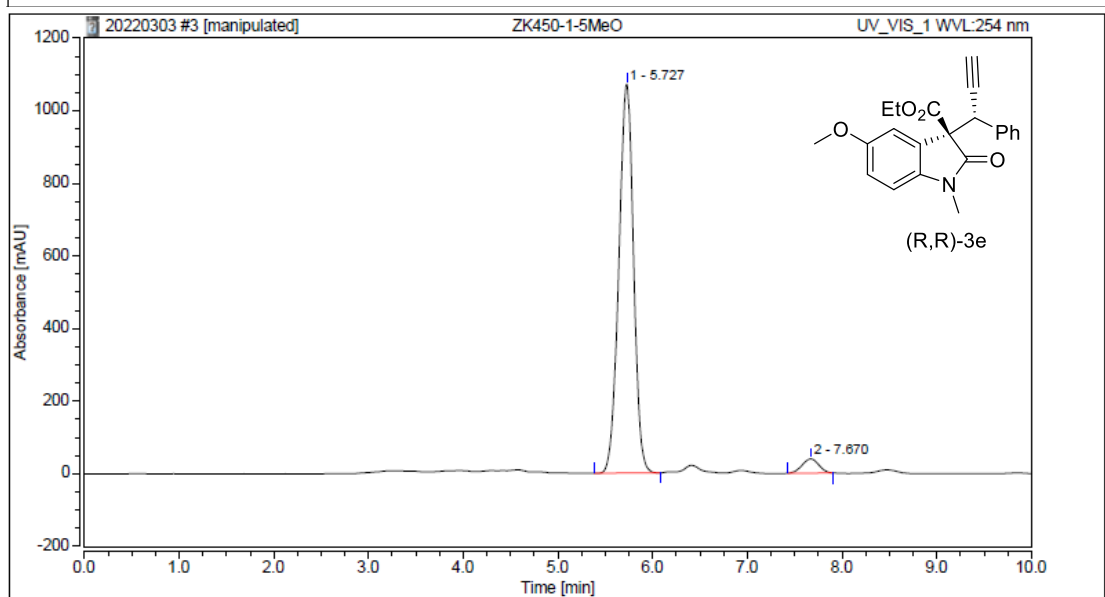

| Integration Results |           |                       |                 |               |                    |                      |                |
|---------------------|-----------|-----------------------|-----------------|---------------|--------------------|----------------------|----------------|
| No.                 | Peak Name | Retention Time<br>min | Area<br>mAU*min | Height<br>mAU | Relative Area<br>% | Relative Height<br>% | Amount<br>n.a. |
| 1                   |           | 5.727                 | 193.160         | 1070.976      | 96.03              | 96.49                | n.a.           |
| 2                   |           | 7.670                 | 7.987           | 38.956        | 3.97               | 3.51                 | n.a.           |
| Total:              |           |                       | 201.147         | 1109.932      | 100.00             | 100.00               |                |

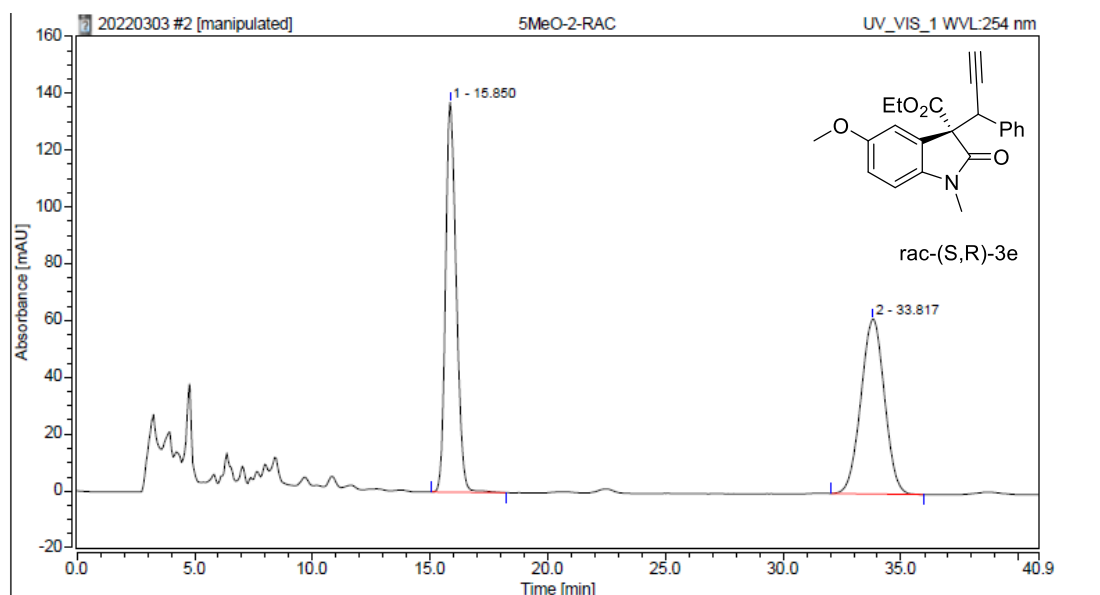

| Integration Results |           |                       |                 |               |                    |                      |                |
|---------------------|-----------|-----------------------|-----------------|---------------|--------------------|----------------------|----------------|
| No.                 | Peak Name | Retention Time<br>min | Area<br>mAU*min | Height<br>mAU | Relative Area<br>% | Relative Height<br>% | Amount<br>n.a. |
| 1                   |           | 15.850                | 72.124          | 137.081       | 50.19              | 69.00                | n.a.           |
| 2                   |           | 33.817                | 71.574          | 61.590        | 49.81              | 31.00                | n.a.           |
| Total:              |           |                       | 143.698         | 198.671       | 100.00             | 100.00               |                |

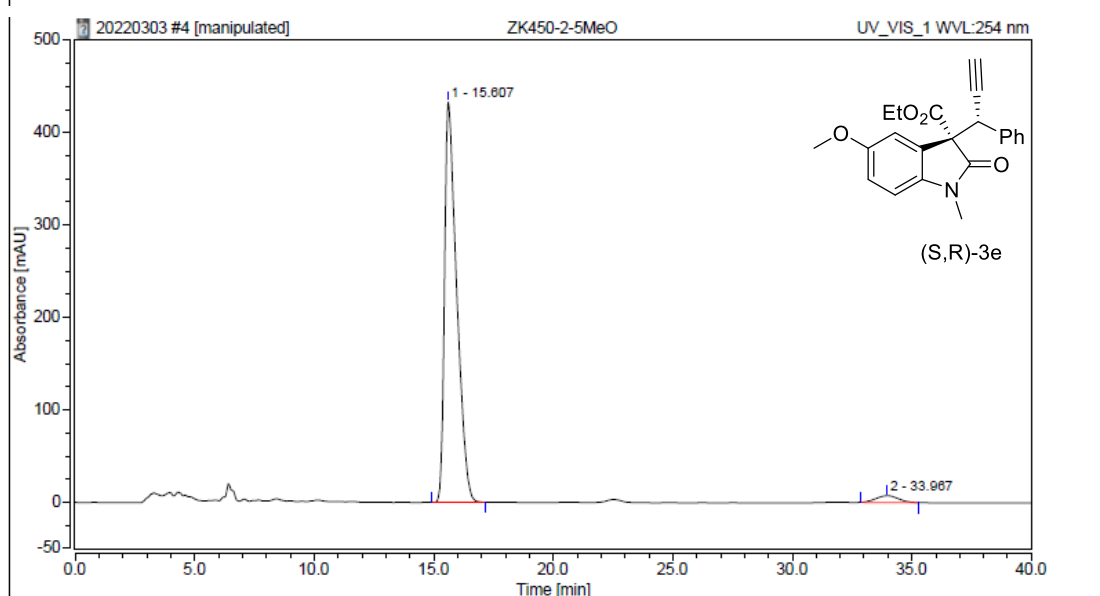

| Integration Results |           |                       |                 |               |                    |                      |                |
|---------------------|-----------|-----------------------|-----------------|---------------|--------------------|----------------------|----------------|
| No.                 | Peak Name | Retention Time<br>min | Area<br>mAU*min | Height<br>mAU | Relative Area<br>% | Relative Height<br>% | Amount<br>n.a. |
| 1                   |           | 15.607                | 254.468         | 433.331       | 96.98              | 98.35                | n.a.           |
| 2                   |           | 33.967                | 7.930           | 7.250         | 3.02               | 1.65                 | n.a.           |
| Total:              |           |                       | 262.399         | 440.580       | 100.00             | 100.00               |                |

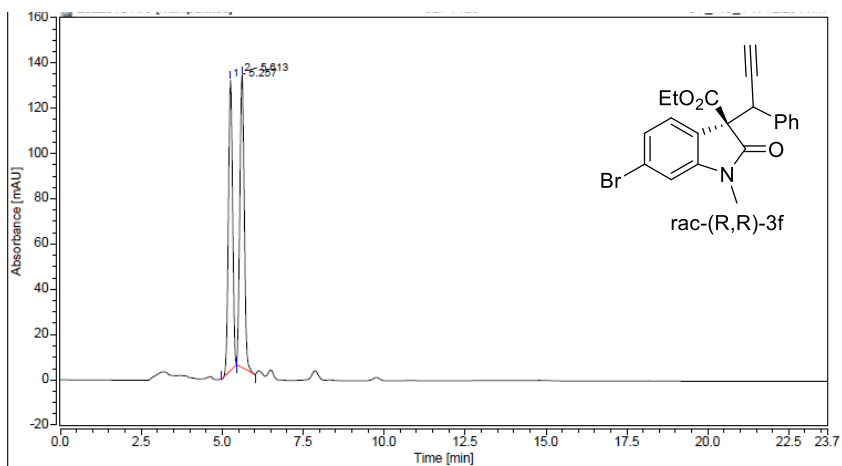

| No.    | Peak Name | Retention Time min | Area mAU*min | Height mAU | Relative Area % | Relative Height % | Amount n.a. |
|--------|-----------|--------------------|--------------|------------|-----------------|-------------------|-------------|
| 1      |           | 5.257              | 19.214       | 128.302    | 48.57           | 49.80             | n.a.        |
| 2      |           | 5.613              | 20.348       | 129.333    | 51.43           | 50.20             | n.a.        |
| Total: |           |                    | 39.562       | 257.636    | 100.00          | 100.00            |             |

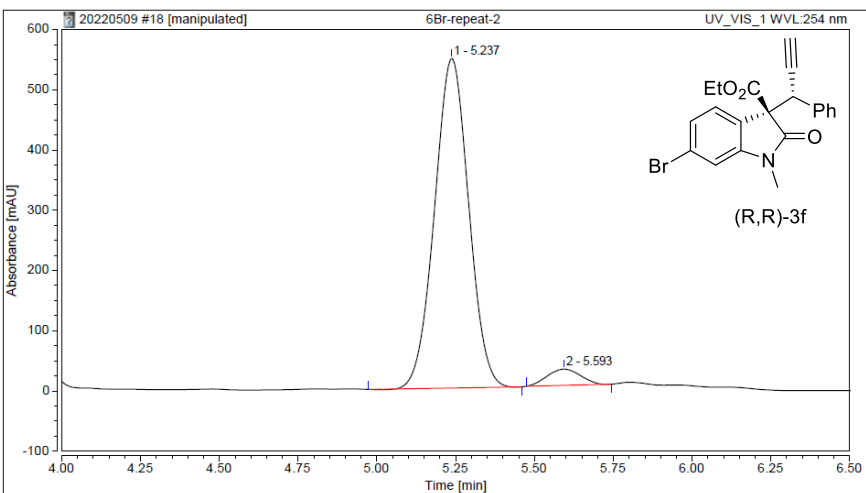

| No.    | Peak Name | Retention Time min | Area mAU*min | Height mAU | Relative Area % | Relative Height % | Amount n.a. |
|--------|-----------|--------------------|--------------|------------|-----------------|-------------------|-------------|
| 1      |           | 5.237              | 68.589       | 547.473    | 95.43           | 95.31             | n.a.        |
| 2      |           | 5.593              | 3.283        | 26.963     | 4.57            | 4.69              | n.a.        |
| Total: |           |                    | 71.872       | 574.436    | 100.00          | 100.00            |             |

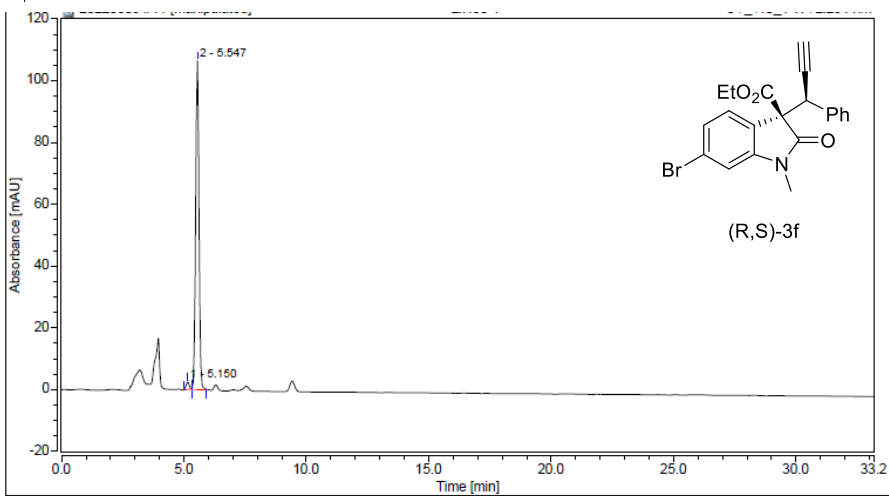

| No.    | Peak Name | Retention Time min | Area mAU*min | Height mAU | Relative Area % | Relative Height % | Amount n.a. |
|--------|-----------|--------------------|--------------|------------|-----------------|-------------------|-------------|
| 1      |           | 5.150              | 0.357        | 2.438      | 2.08            | 2.24              | n.a.        |
| 2      |           | 5.547              | 16.754       | 106.422    | 97.92           | 97.76             | n.a.        |
| Total: |           |                    | 17.111       | 108.859    | 100.00          | 100.00            |             |

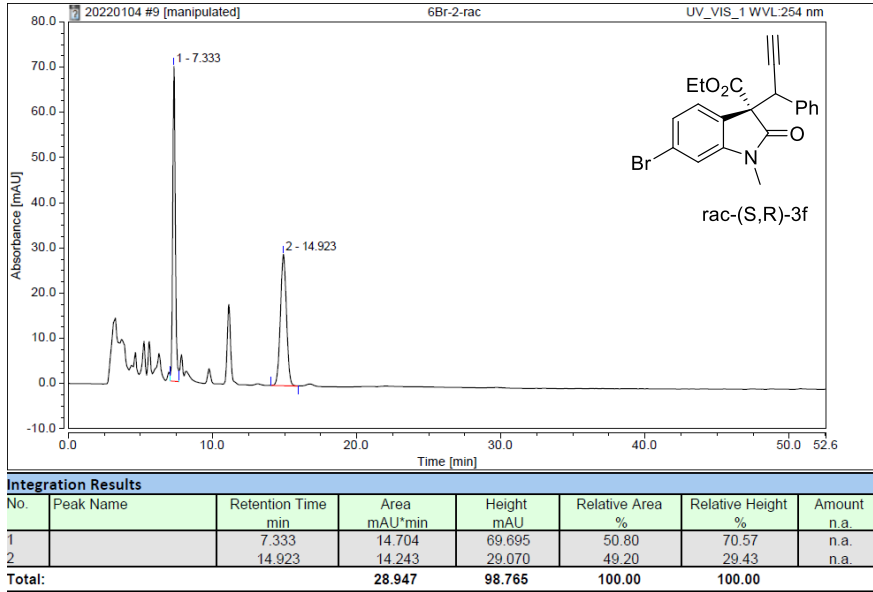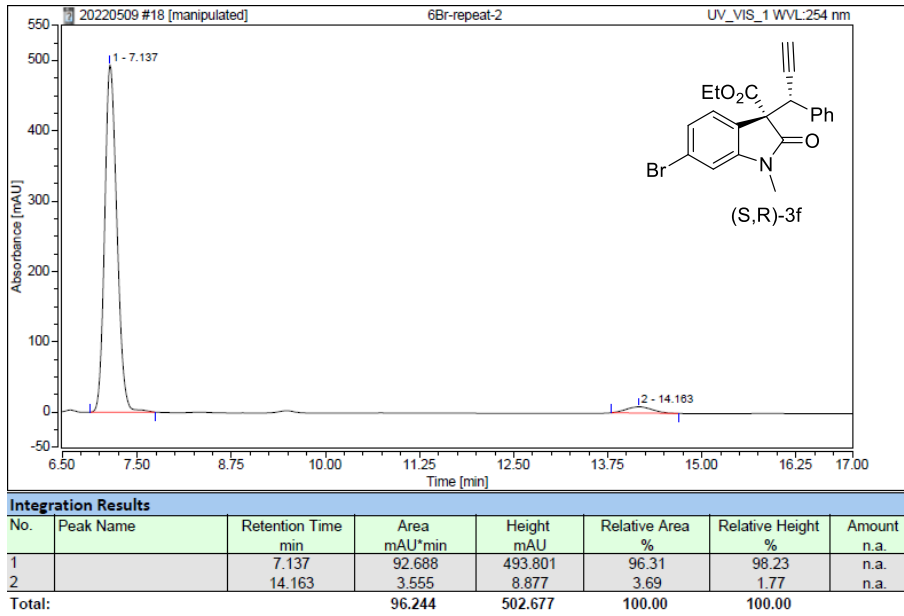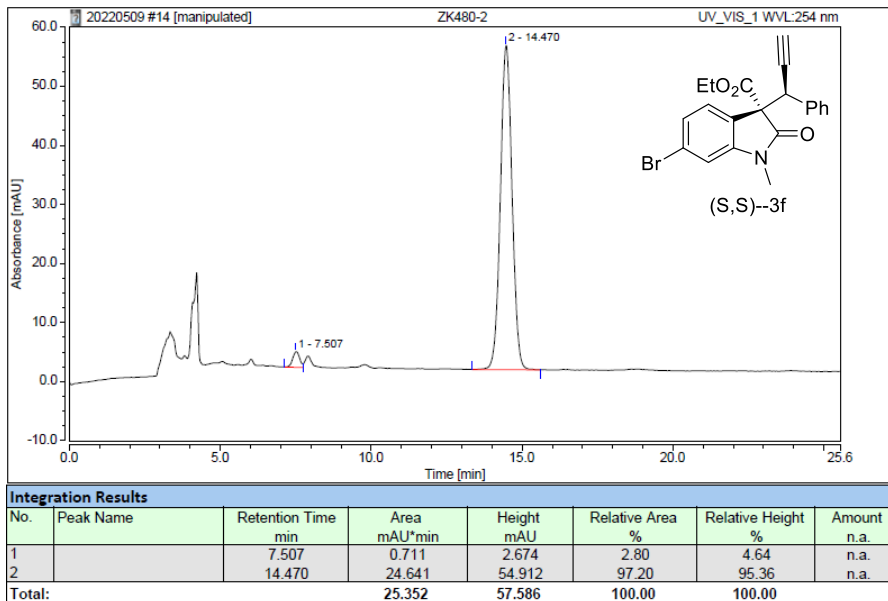

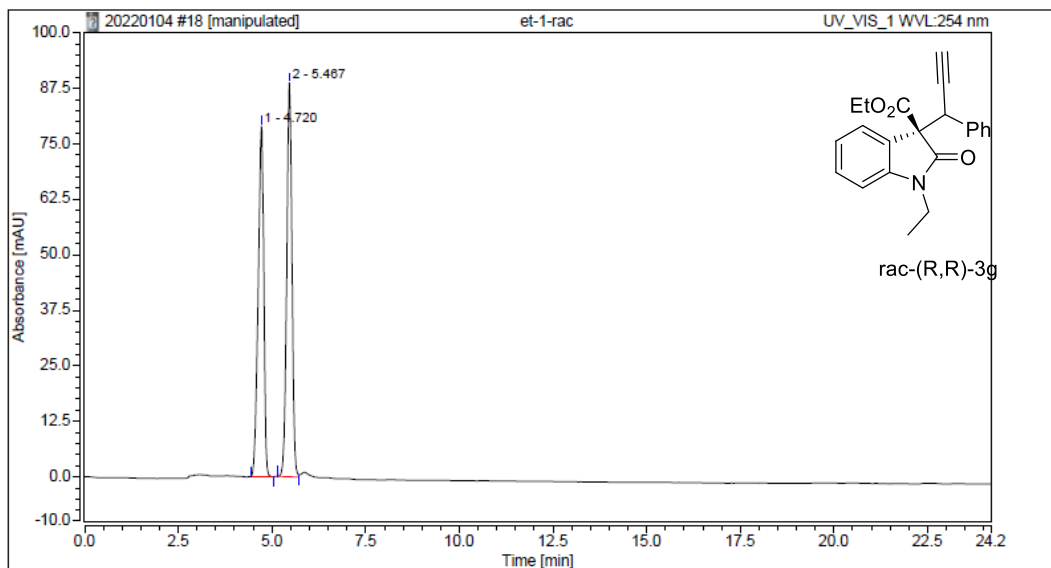

| Integration Results |           |                       |                 |               |                    |                      |                |
|---------------------|-----------|-----------------------|-----------------|---------------|--------------------|----------------------|----------------|
| No.                 | Peak Name | Retention Time<br>min | Area<br>mAU*min | Height<br>mAU | Relative Area<br>% | Relative Height<br>% | Amount<br>n.a. |
| 1                   |           | 4.720                 | 13.666          | 79.018        | 48.68              | 47.09                | n.a.           |
| 2                   |           | 5.467                 | 14.404          | 88.782        | 51.32              | 52.91                | n.a.           |
| Total:              |           |                       | 28.070          | 167.800       | 100.00             | 100.00               |                |

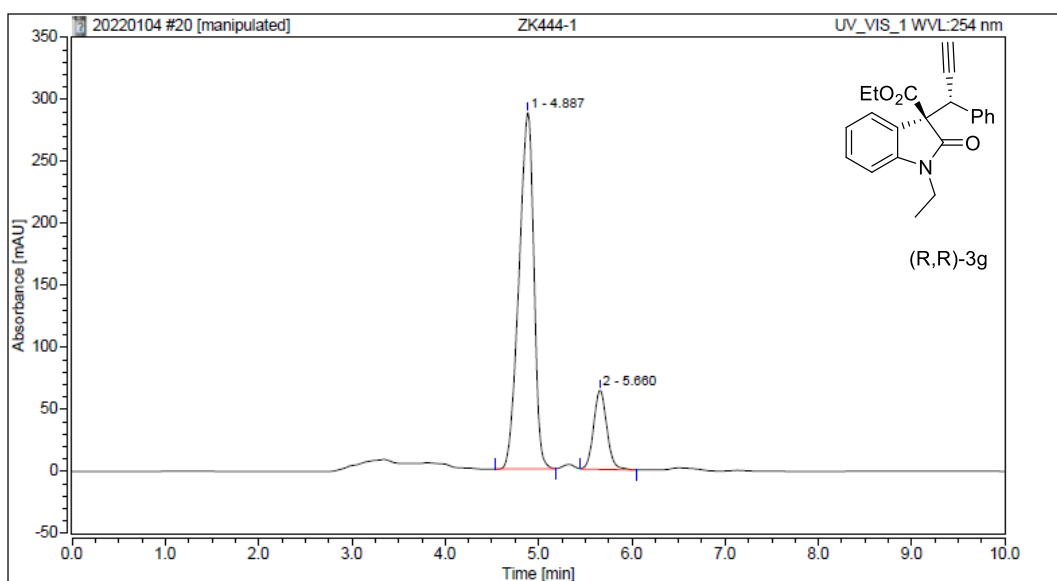

| Integration Results |           |                       |                 |               |                    |                      |                |
|---------------------|-----------|-----------------------|-----------------|---------------|--------------------|----------------------|----------------|
| No.                 | Peak Name | Retention Time<br>min | Area<br>mAU*min | Height<br>mAU | Relative Area<br>% | Relative Height<br>% | Amount<br>n.a. |
| 1                   |           | 4.887                 | 53.147          | 286.986       | 83.54              | 81.80                | n.a.           |
| 2                   |           | 5.660                 | 10.470          | 63.858        | 16.46              | 18.20                | n.a.           |
| Total:              |           |                       | 63.617          | 350.844       | 100.00             | 100.00               |                |

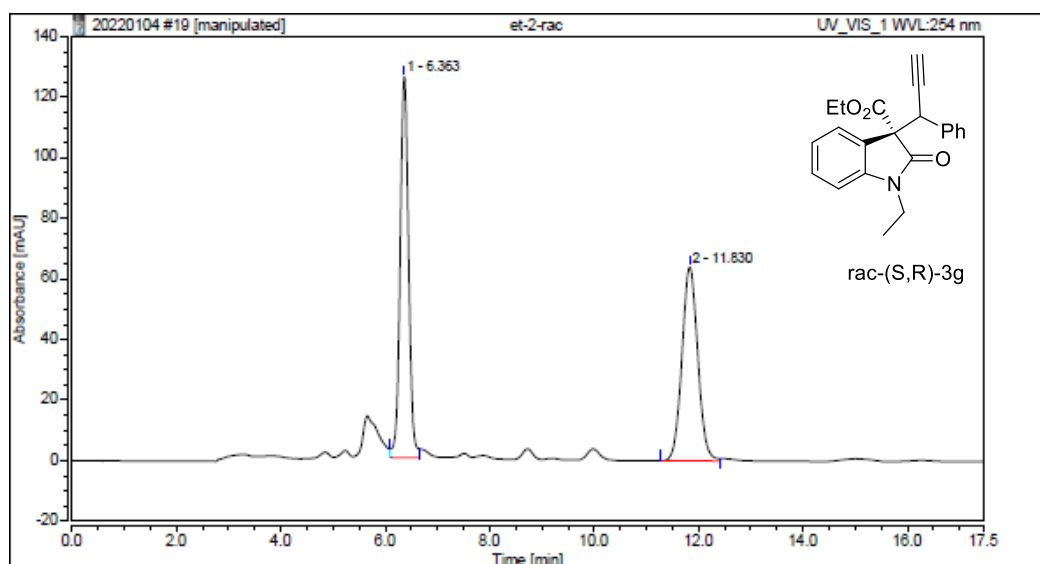

| Integration Results |           |                       |                 |                |                    |                      |                |
|---------------------|-----------|-----------------------|-----------------|----------------|--------------------|----------------------|----------------|
| No.                 | Peak Name | Retention Time<br>min | Area<br>mAU*min | Height<br>mAU  | Relative Area<br>% | Relative Height<br>% | Amount<br>n.a. |
| 1                   |           | 6.363                 | 23.488          | 125.912        | 51.08              | 66.28                | n.a.           |
| 2                   |           | 11.830                | 22.492          | 64.071         | 48.92              | 33.72                | n.a.           |
| <b>Total:</b>       |           |                       | <b>45.979</b>   | <b>189.983</b> | <b>100.00</b>      | <b>100.00</b>        |                |

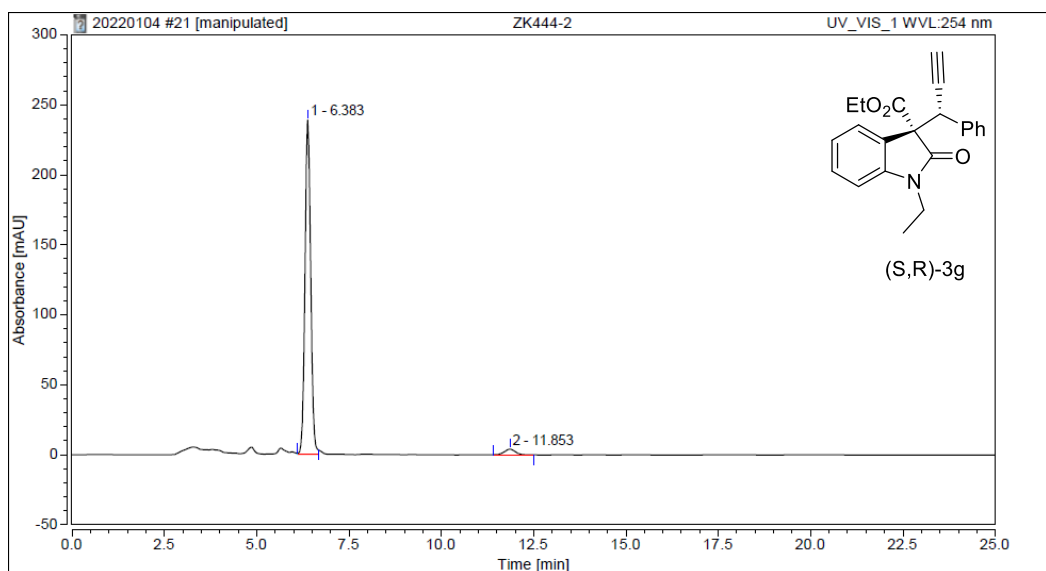

| Integration Results |           |                       |                 |                |                    |                      |                |
|---------------------|-----------|-----------------------|-----------------|----------------|--------------------|----------------------|----------------|
| No.                 | Peak Name | Retention Time<br>min | Area<br>mAU*min | Height<br>mAU  | Relative Area<br>% | Relative Height<br>% | Amount<br>n.a. |
| 1                   |           | 6.383                 | 42.821          | 238.841        | 96.84              | 98.35                | n.a.           |
| 2                   |           | 11.853                | 1.397           | 4.005          | 3.16               | 1.65                 | n.a.           |
| <b>Total:</b>       |           |                       | <b>44.218</b>   | <b>242.846</b> | <b>100.00</b>      | <b>100.00</b>        |                |

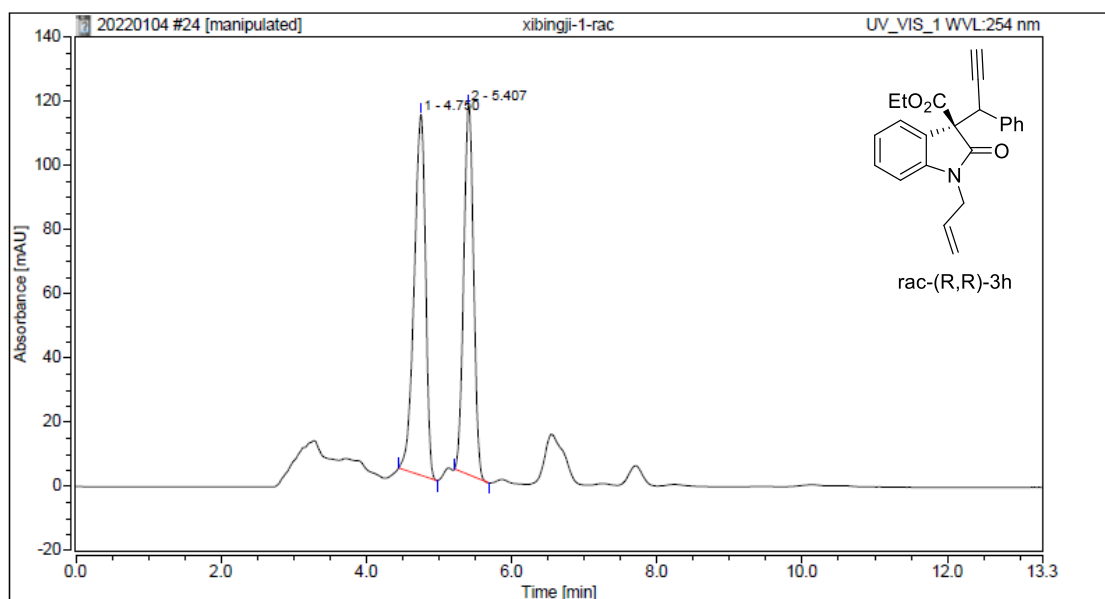

**Integration Results**

| No.           | Peak Name | Retention Time min | Area mAU*min  | Height mAU     | Relative Area % | Relative Height % | Amount n.a. |
|---------------|-----------|--------------------|---------------|----------------|-----------------|-------------------|-------------|
| 1             |           | 4.750              | 20.251        | 112.508        | 52.86           | 49.42             | n.a.        |
| 2             |           | 5.407              | 18.058        | 115.137        | 47.14           | 50.58             | n.a.        |
| <b>Total:</b> |           |                    | <b>38.309</b> | <b>227.645</b> | <b>100.00</b>   | <b>100.00</b>     |             |

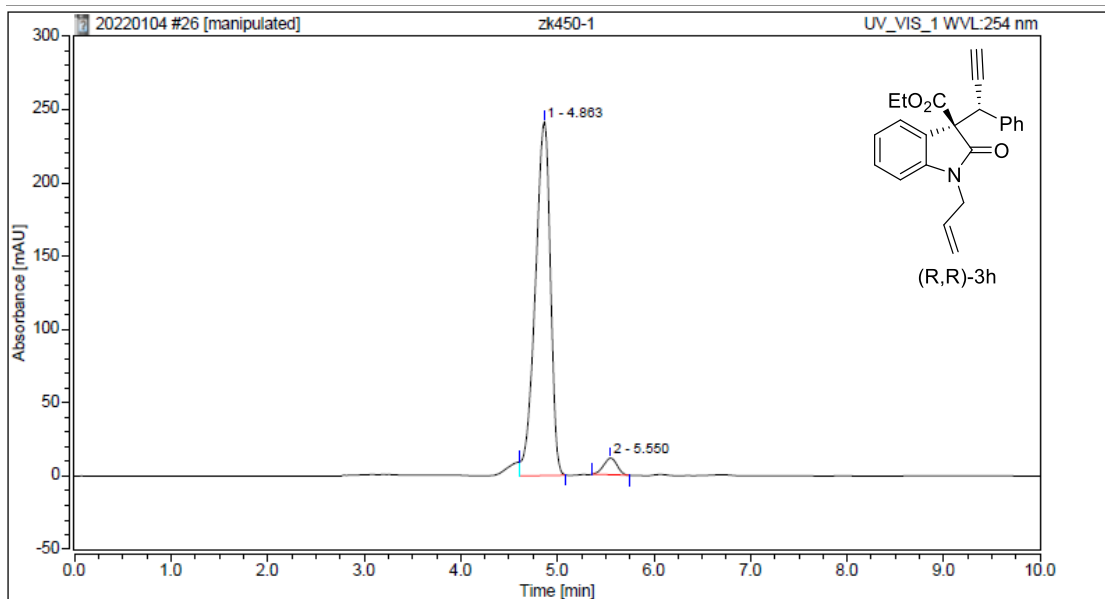

**Integration Results**

| No.           | Peak Name | Retention Time min | Area mAU*min  | Height mAU     | Relative Area % | Relative Height % | Amount n.a. |
|---------------|-----------|--------------------|---------------|----------------|-----------------|-------------------|-------------|
| 1             |           | 4.863              | 43.656        | 241.402        | 95.97           | 95.52             | n.a.        |
| 2             |           | 5.550              | 1.834         | 11.332         | 4.03            | 4.48              | n.a.        |
| <b>Total:</b> |           |                    | <b>45.490</b> | <b>252.734</b> | <b>100.00</b>   | <b>100.00</b>     |             |

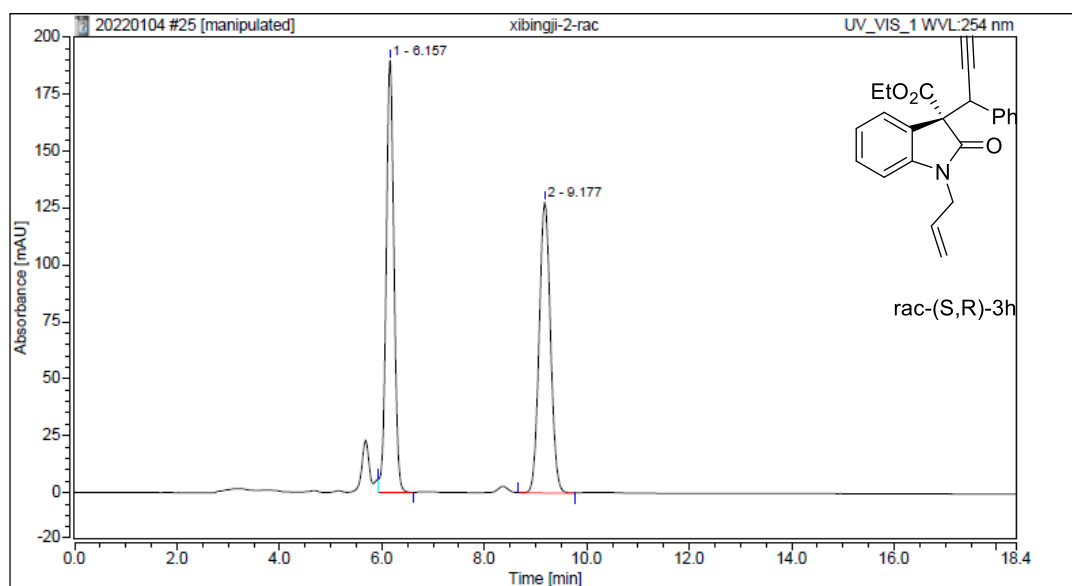

| Integration Results |           |                    |              |            |                 |                   |             |
|---------------------|-----------|--------------------|--------------|------------|-----------------|-------------------|-------------|
| No.                 | Peak Name | Retention Time min | Area mAU*min | Height mAU | Relative Area % | Relative Height % | Amount n.a. |
| 1                   |           | 6.157              | 33.224       | 189.840    | 50.30           | 59.74             | n.a.        |
| 2                   |           | 9.177              | 32.829       | 127.951    | 49.70           | 40.26             | n.a.        |
| Total:              |           |                    | 66.052       | 317.791    | 100.00          | 100.00            |             |

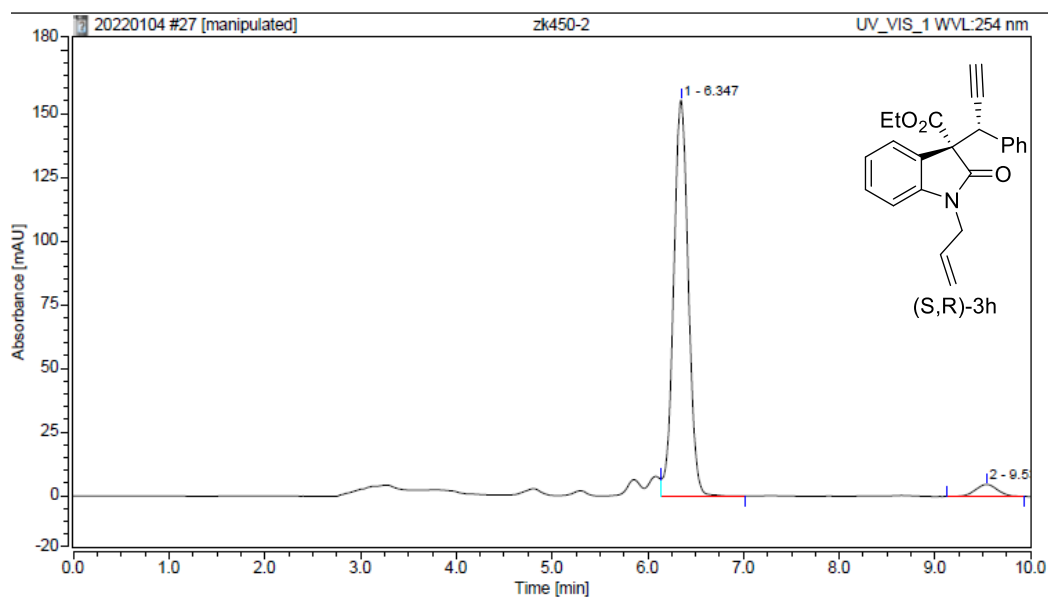

| Integration Results |           |                    |              |            |                 |                   |             |
|---------------------|-----------|--------------------|--------------|------------|-----------------|-------------------|-------------|
| No.                 | Peak Name | Retention Time min | Area mAU*min | Height mAU | Relative Area % | Relative Height % | Amount n.a. |
| 1                   |           | 6.347              | 27.511       | 155.297    | 95.63           | 97.05             | n.a.        |
| 2                   |           | 9.537              | 1.259        | 4.723      | 4.37            | 2.95              | n.a.        |
| Total:              |           |                    | 28.770       | 160.019    | 100.00          | 100.00            |             |



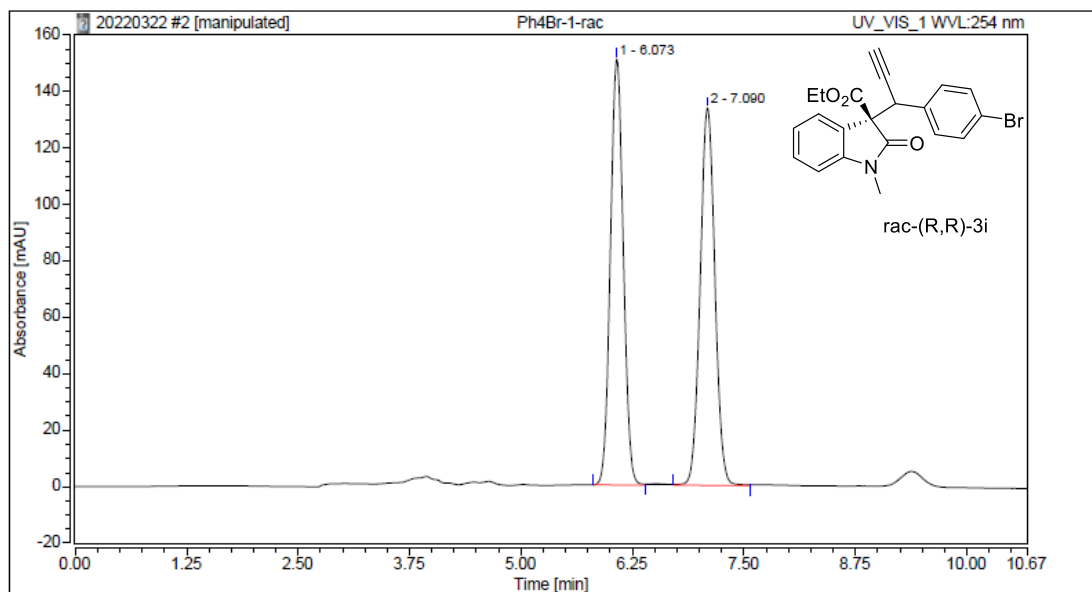

**Integration Results**

| No.           | Peak Name | Retention Time<br>min | Area<br>mAU*min | Height<br>mAU  | Relative Area<br>% | Relative Height<br>% | Amount<br>n.a. |
|---------------|-----------|-----------------------|-----------------|----------------|--------------------|----------------------|----------------|
| 1             |           | 6.073                 | 25.254          | 150.799        | 49.64              | 53.00                | n.a.           |
| 2             |           | 7.090                 | 25.620          | 133.738        | 50.36              | 47.00                | n.a.           |
| <b>Total:</b> |           |                       | <b>50.875</b>   | <b>284.537</b> | <b>100.00</b>      | <b>100.00</b>        |                |

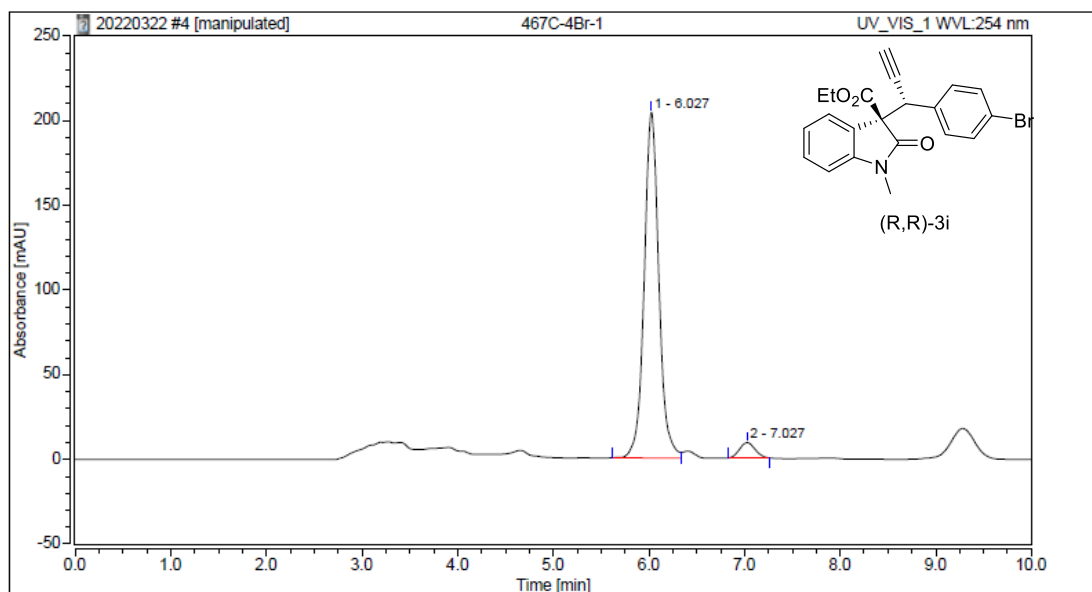

**Integration Results**

| No.           | Peak Name | Retention Time<br>min | Area<br>mAU*min | Height<br>mAU  | Relative Area<br>% | Relative Height<br>% | Amount<br>n.a. |
|---------------|-----------|-----------------------|-----------------|----------------|--------------------|----------------------|----------------|
| 1             |           | 6.027                 | 36.182          | 204.163        | 95.47              | 95.73                | n.a.           |
| 2             |           | 7.027                 | 1.718           | 9.109          | 4.53               | 4.27                 | n.a.           |
| <b>Total:</b> |           |                       | <b>37.900</b>   | <b>213.272</b> | <b>100.00</b>      | <b>100.00</b>        |                |

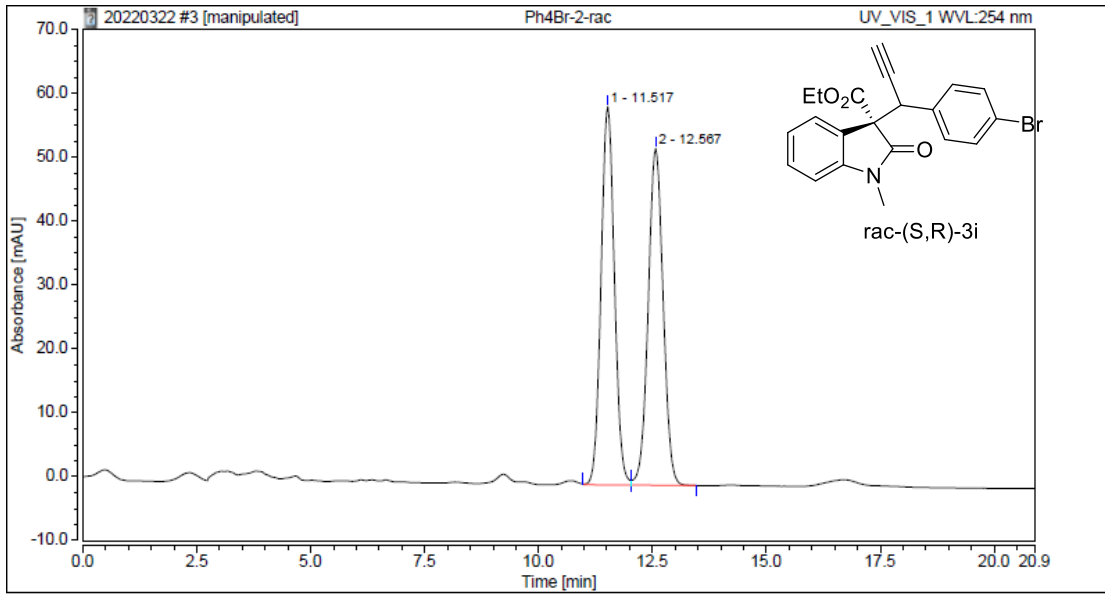

**Integration Results**

| No.           | Peak Name | Retention Time<br>min | Area<br>mAU*min | Height<br>mAU  | Relative Area<br>% | Relative Height<br>% | Amount<br>n.a. |
|---------------|-----------|-----------------------|-----------------|----------------|--------------------|----------------------|----------------|
| 1             |           | 11.517                | 20.176          | 59.339         | 50.15              | 52.93                | n.a.           |
| 2             |           | 12.567                | 20.053          | 52.768         | 49.85              | 47.07                | n.a.           |
| <b>Total:</b> |           |                       | <b>40.229</b>   | <b>112.107</b> | <b>100.00</b>      | <b>100.00</b>        |                |

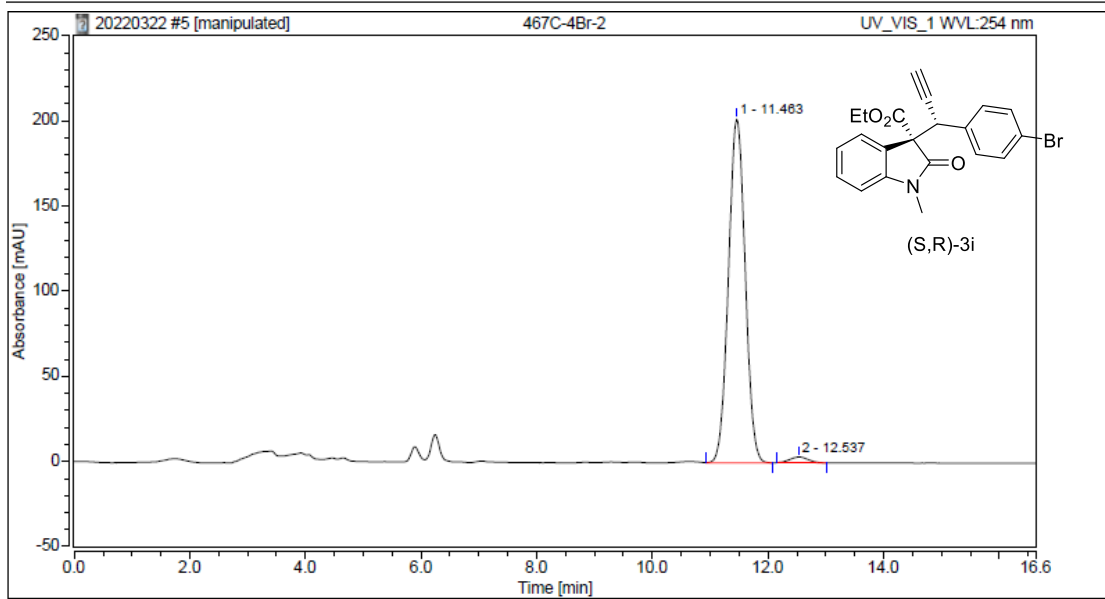

**Integration Results**

| No.           | Peak Name | Retention Time<br>min | Area<br>mAU*min | Height<br>mAU  | Relative Area<br>% | Relative Height<br>% | Amount<br>n.a. |
|---------------|-----------|-----------------------|-----------------|----------------|--------------------|----------------------|----------------|
| 1             |           | 11.463                | 67.730          | 202.029        | 98.23              | 98.36                | n.a.           |
| 2             |           | 12.537                | 1.222           | 3.372          | 1.77               | 1.64                 | n.a.           |
| <b>Total:</b> |           |                       | <b>68.953</b>   | <b>205.401</b> | <b>100.00</b>      | <b>100.00</b>        |                |

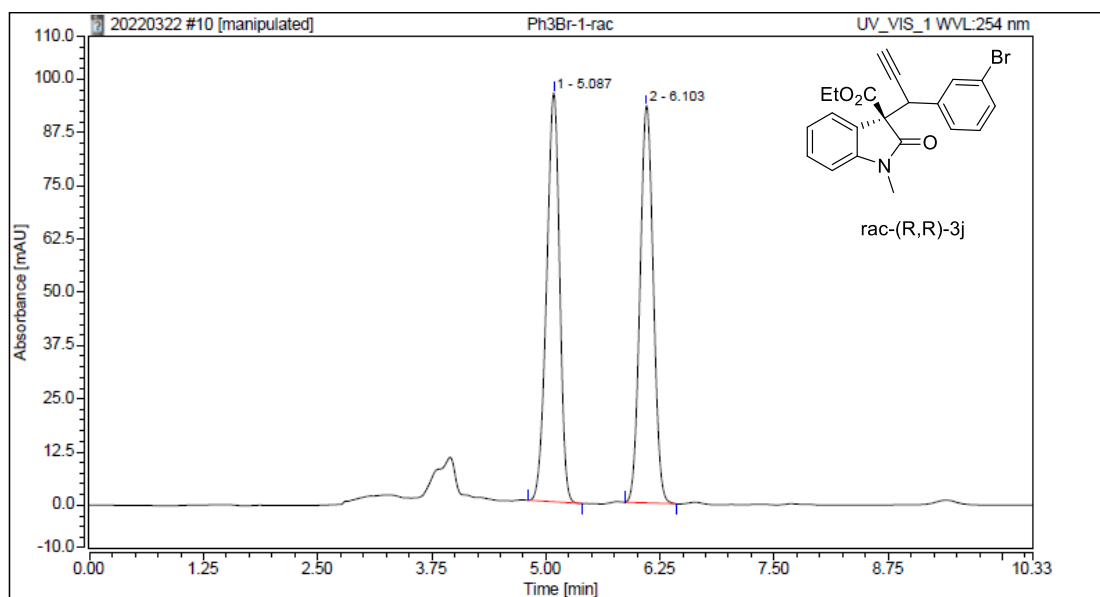

| Integration Results |           |                       |                 |               |                    |                      |                |
|---------------------|-----------|-----------------------|-----------------|---------------|--------------------|----------------------|----------------|
| No.                 | Peak Name | Retention Time<br>min | Area<br>mAU*min | Height<br>mAU | Relative Area<br>% | Relative Height<br>% | Amount<br>n.a. |
| 1                   |           | 5.087                 | 15.775          | 96.021        | 50.14              | 50.72                | n.a.           |
| 2                   |           | 6.103                 | 15.684          | 93.288        | 49.86              | 49.28                | n.a.           |
| Total:              |           |                       | 31.459          | 189.309       | 100.00             | 100.00               |                |

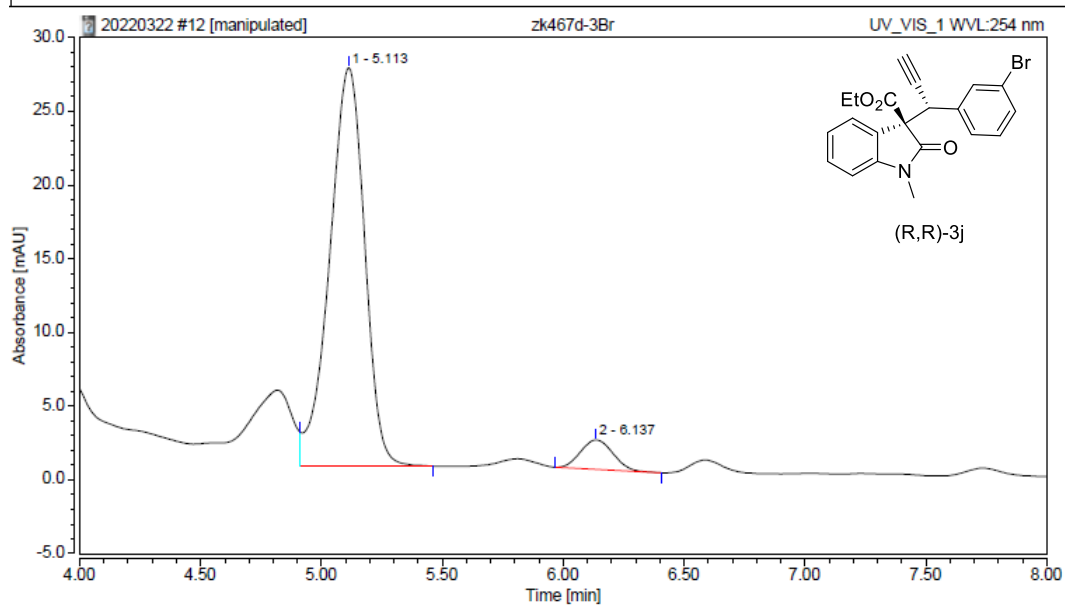

| Integration Results |           |                       |                 |               |                    |                      |                |
|---------------------|-----------|-----------------------|-----------------|---------------|--------------------|----------------------|----------------|
| No.                 | Peak Name | Retention Time<br>min | Area<br>mAU*min | Height<br>mAU | Relative Area<br>% | Relative Height<br>% | Amount<br>n.a. |
| 1                   |           | 5.113                 | 4.532           | 27.026        | 93.61              | 93.14                | n.a.           |
| 2                   |           | 6.137                 | 0.309           | 1.992         | 6.39               | 6.86                 | n.a.           |
| Total:              |           |                       | 4.842           | 29.018        | 100.00             | 100.00               |                |

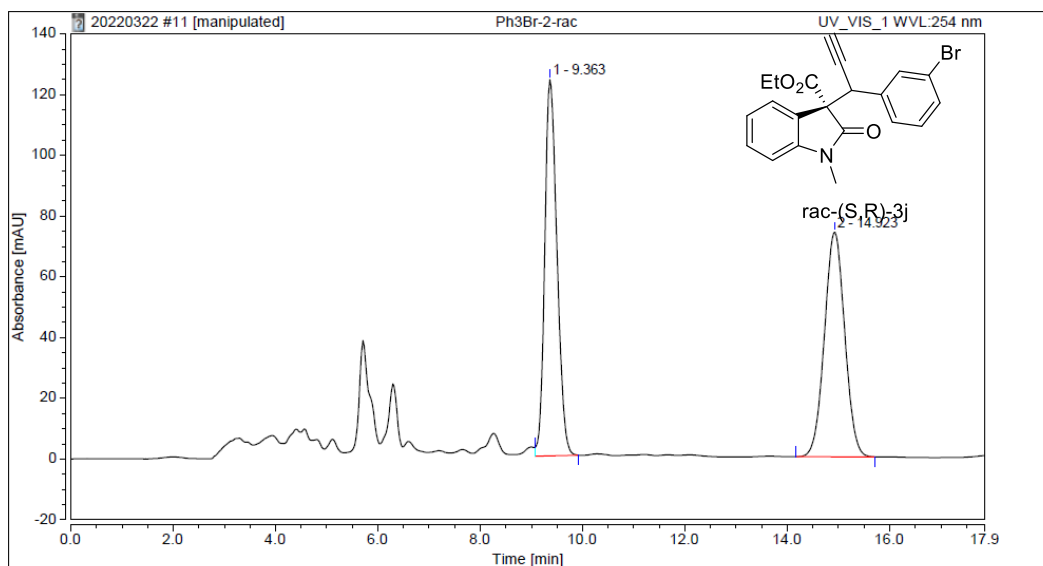

**Integration Results**

| No.           | Peak Name | Retention Time<br>min | Area<br>mAU*min | Height<br>mAU  | Relative Area<br>% | Relative Height<br>% | Amount<br>n.a. |
|---------------|-----------|-----------------------|-----------------|----------------|--------------------|----------------------|----------------|
| 1             |           | 9.363                 | 34.260          | 123.967        | 50.21              | 62.61                | n.a.           |
| 2             |           | 14.923                | 33.973          | 74.028         | 49.79              | 37.39                | n.a.           |
| <b>Total:</b> |           |                       | <b>68.233</b>   | <b>197.996</b> | <b>100.00</b>      | <b>100.00</b>        |                |

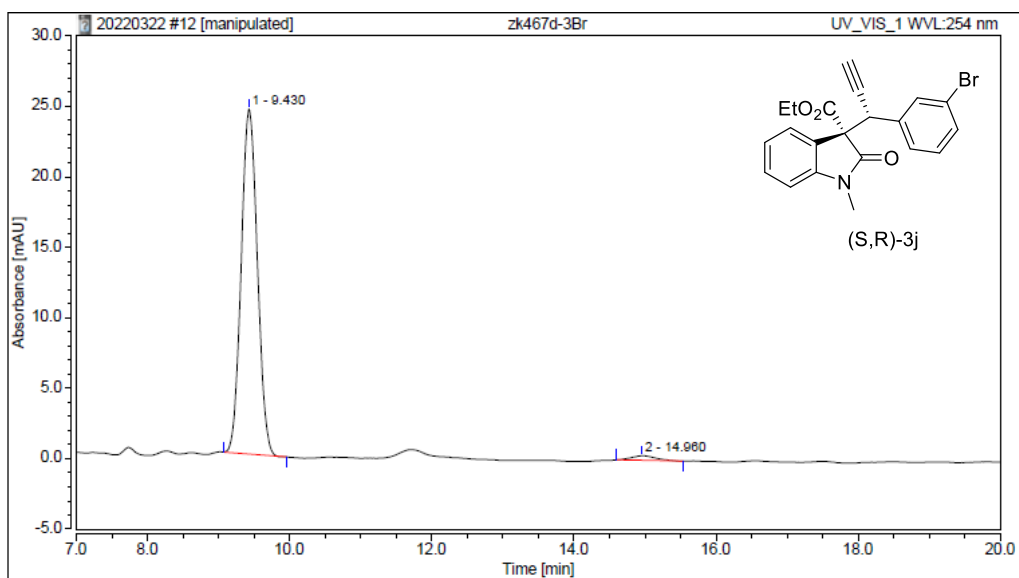

**Integration Results**

| No.           | Peak Name | Retention Time<br>min | Area<br>mAU*min | Height<br>mAU | Relative Area<br>% | Relative Height<br>% | Amount<br>n.a. |
|---------------|-----------|-----------------------|-----------------|---------------|--------------------|----------------------|----------------|
| 1             |           | 9.430                 | 6.435           | 24.481        | 98.05              | 98.68                | n.a.           |
| 2             |           | 14.960                | 0.128           | 0.326         | 1.95               | 1.32                 | n.a.           |
| <b>Total:</b> |           |                       | <b>6.563</b>    | <b>24.807</b> | <b>100.00</b>      | <b>100.00</b>        |                |

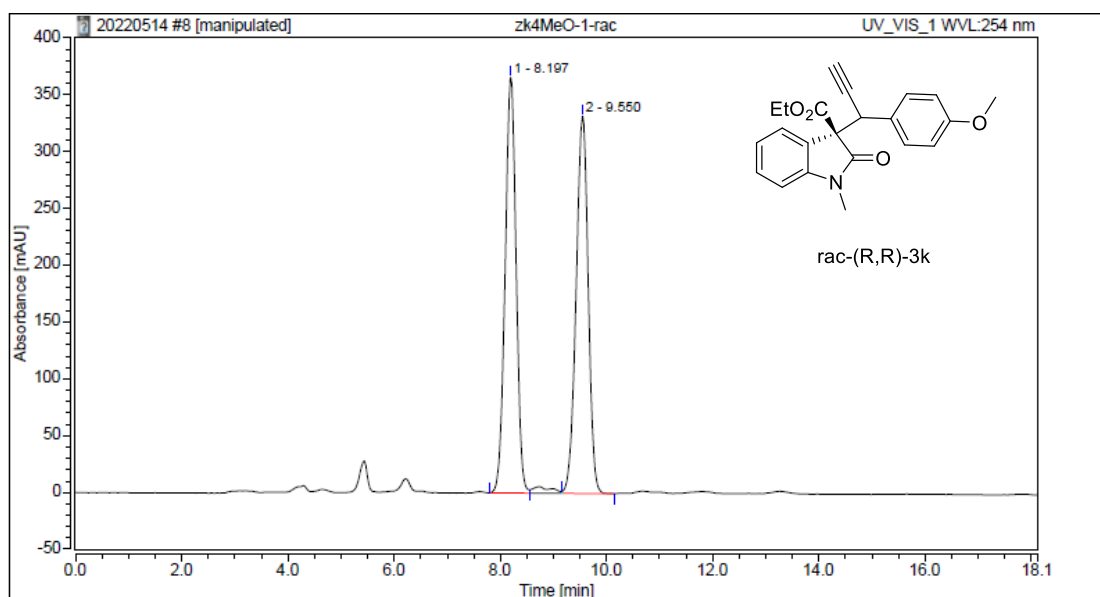

**Integration Results**

| No.           | Peak Name | Retention Time min | Area mAU*min   | Height mAU     | Relative Area % | Relative Height % | Amount n.a. |
|---------------|-----------|--------------------|----------------|----------------|-----------------|-------------------|-------------|
| 1             |           | 8.197              | 87.584         | 365.829        | 49.99           | 52.43             | n.a.        |
| 2             |           | 9.550              | 87.620         | 331.907        | 50.01           | 47.57             | n.a.        |
| <b>Total:</b> |           |                    | <b>175.204</b> | <b>697.736</b> | <b>100.00</b>   | <b>100.00</b>     |             |

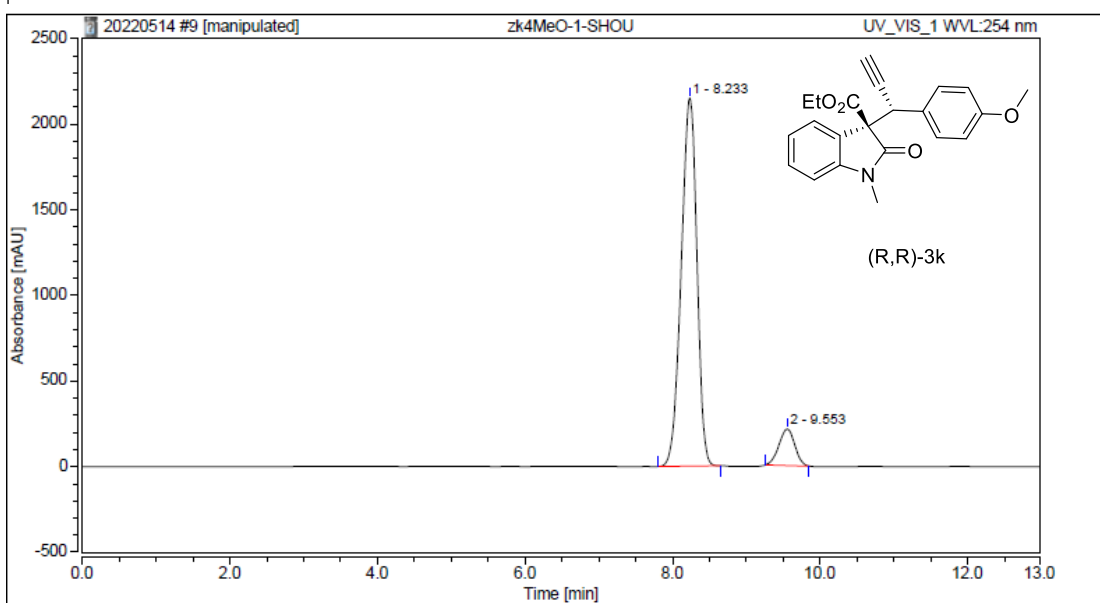

**Integration Results**

| No.           | Peak Name | Retention Time min | Area mAU*min   | Height mAU      | Relative Area % | Relative Height % | Amount n.a. |
|---------------|-----------|--------------------|----------------|-----------------|-----------------|-------------------|-------------|
| 1             |           | 8.233              | 528.631        | 2149.837        | 90.92           | 91.01             | n.a.        |
| 2             |           | 9.553              | 52.770         | 212.276         | 9.08            | 8.99              | n.a.        |
| <b>Total:</b> |           |                    | <b>581.401</b> | <b>2362.114</b> | <b>100.00</b>   | <b>100.00</b>     |             |

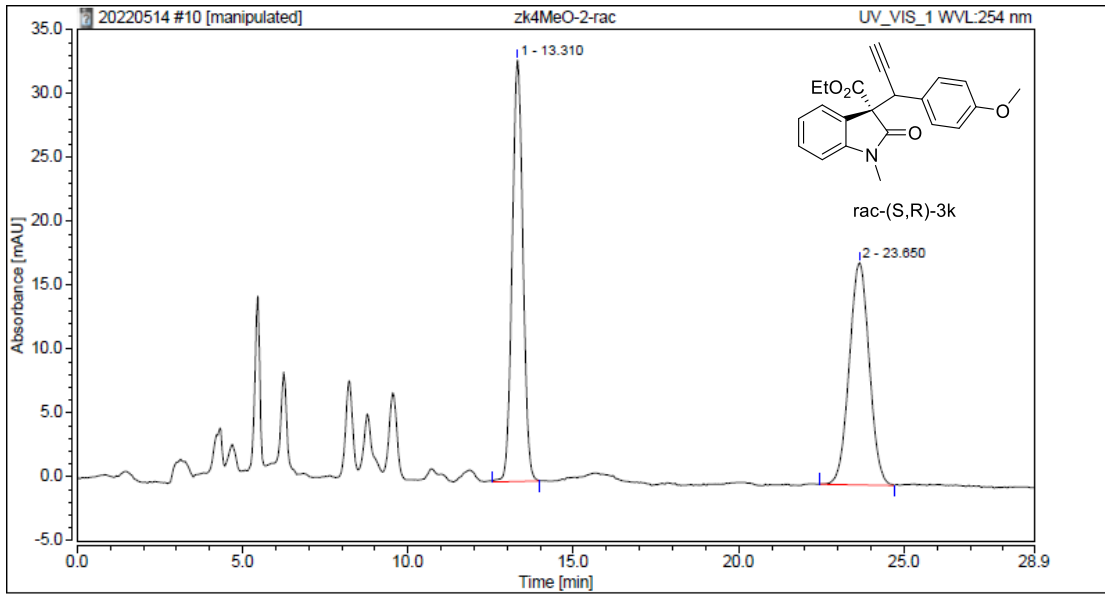

**Integration Results**

| No.           | Peak Name | Retention Time<br>min | Area<br>mAU*min | Height<br>mAU | Relative Area<br>% | Relative Height<br>% | Amount |
|---------------|-----------|-----------------------|-----------------|---------------|--------------------|----------------------|--------|
| 1             |           | 13.310                | 12.441          | 32.976        | 50.51              | 65.44                | n.a.   |
| 2             |           | 23.650                | 12.188          | 17.418        | 49.49              | 34.56                | n.a.   |
| <b>Total:</b> |           |                       | <b>24.629</b>   | <b>50.393</b> | <b>100.00</b>      | <b>100.00</b>        |        |

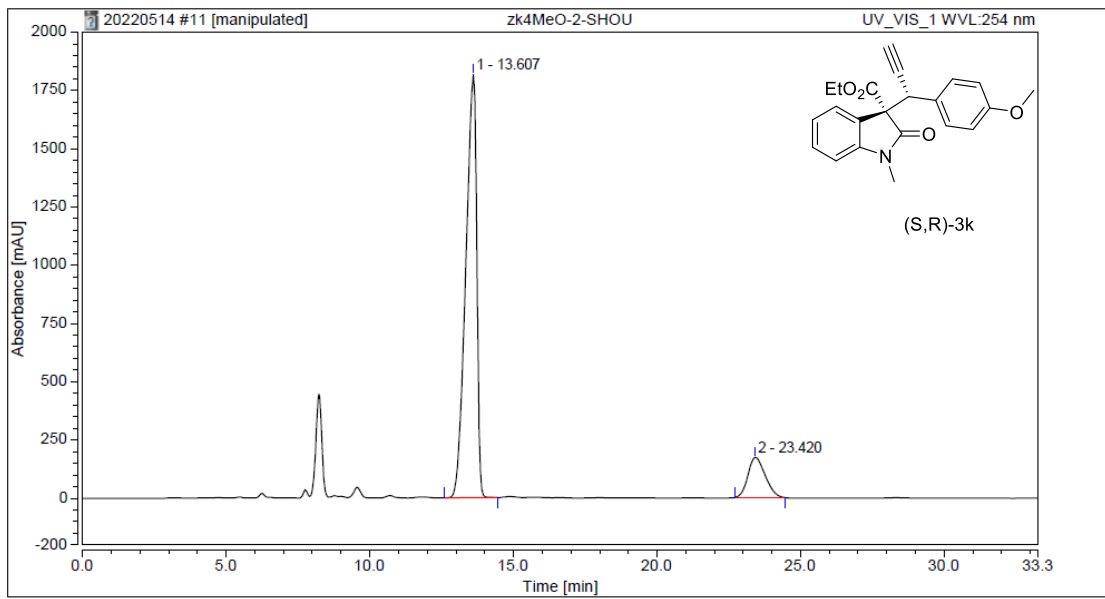

**Integration Results**

| No.           | Peak Name | Retention Time<br>min | Area<br>mAU*min | Height<br>mAU   | Relative Area<br>% | Relative Height<br>% | Amount |
|---------------|-----------|-----------------------|-----------------|-----------------|--------------------|----------------------|--------|
| 1             |           | 13.607                | 799.741         | 1815.027        | 86.98              | 91.33                | n.a.   |
| 2             |           | 23.420                | 119.732         | 172.390         | 13.02              | 8.67                 | n.a.   |
| <b>Total:</b> |           |                       | <b>919.474</b>  | <b>1987.417</b> | <b>100.00</b>      | <b>100.00</b>        |        |

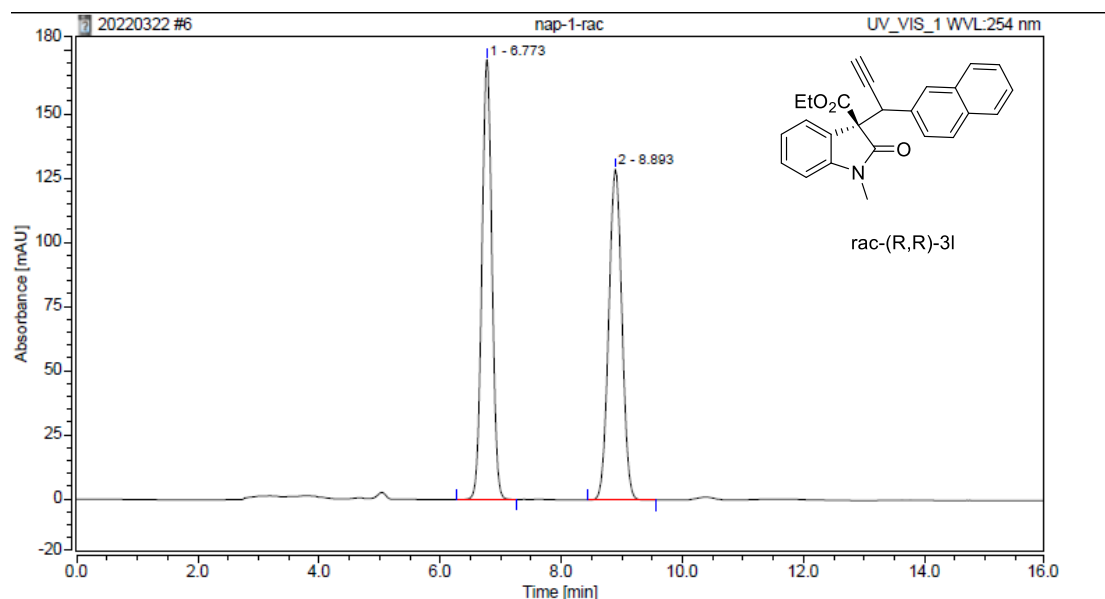

**Integration Results**

| No.           | Peak Name | Retention Time min | Area mAU*min  | Height mAU     | Relative Area % | Relative Height % | Amount n.a. |
|---------------|-----------|--------------------|---------------|----------------|-----------------|-------------------|-------------|
| 1             |           | 6.773              | 32.731        | 171.348        | 50.25           | 57.06             | n.a.        |
| 2             |           | 8.893              | 32.401        | 128.924        | 49.75           | 42.94             | n.a.        |
| <b>Total:</b> |           |                    | <b>65.132</b> | <b>300.272</b> | <b>100.00</b>   | <b>100.00</b>     |             |

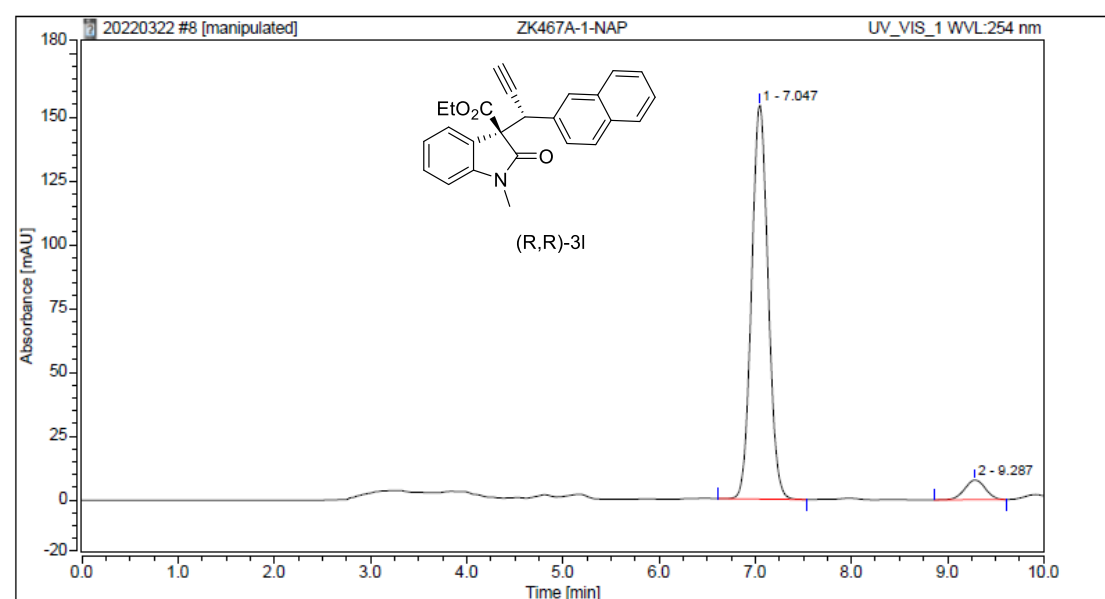

**Integration Results**

| No.           | Peak Name | Retention Time min | Area mAU*min  | Height mAU     | Relative Area % | Relative Height % | Amount n.a. |
|---------------|-----------|--------------------|---------------|----------------|-----------------|-------------------|-------------|
| 1             |           | 7.047              | 30.677        | 154.380        | 94.12           | 95.26             | n.a.        |
| 2             |           | 9.287              | 1.916         | 7.686          | 5.88            | 4.74              | n.a.        |
| <b>Total:</b> |           |                    | <b>32.593</b> | <b>162.066</b> | <b>100.00</b>   | <b>100.00</b>     |             |

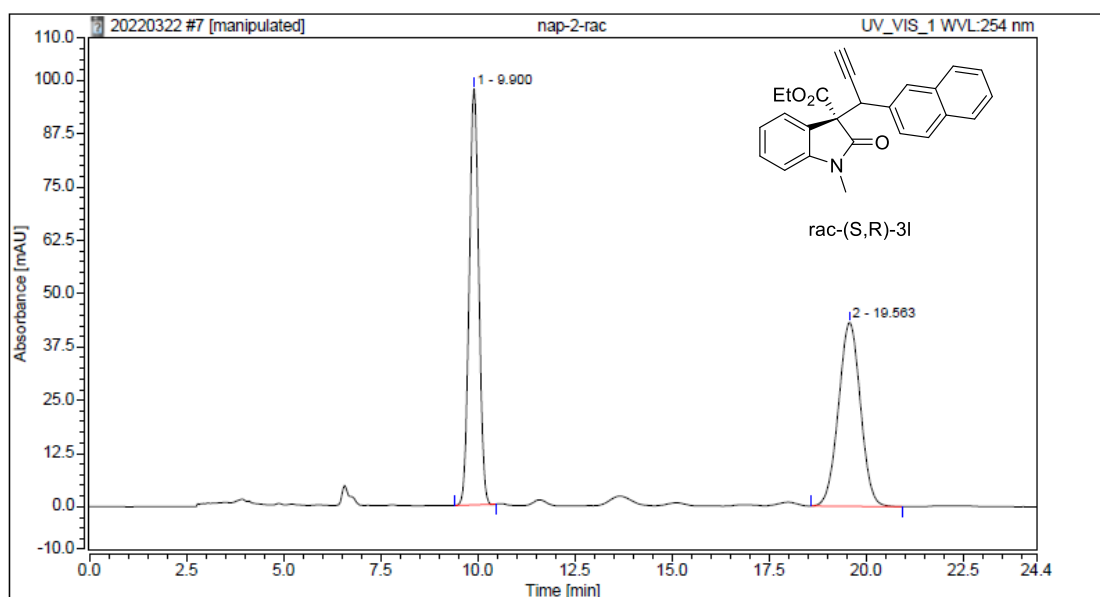

**Integration Results**

| No.           | Peak Name | Retention Time min | Area mAU*min  | Height mAU     | Relative Area % | Relative Height % | Amount n.a. |
|---------------|-----------|--------------------|---------------|----------------|-----------------|-------------------|-------------|
| 1             |           | 9.900              | 27.820        | 97.632         | 49.58           | 69.33             | n.a.        |
| 2             |           | 19.563             | 28.287        | 43.193         | 50.42           | 30.67             | n.a.        |
| <b>Total:</b> |           |                    | <b>56.107</b> | <b>140.825</b> | <b>100.00</b>   | <b>100.00</b>     |             |

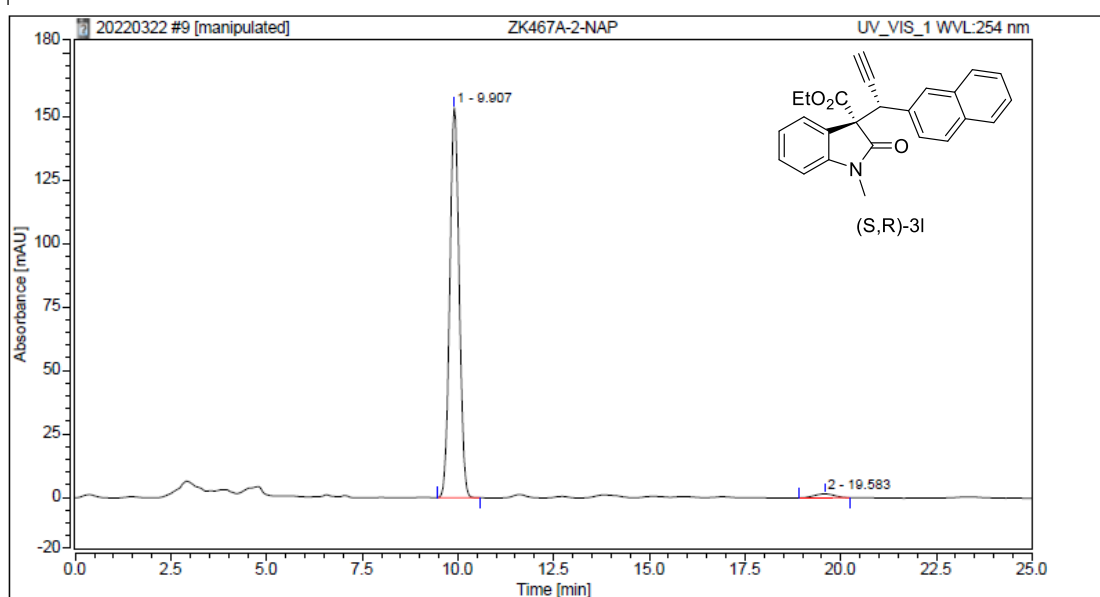

**Integration Results**

| No.           | Peak Name | Retention Time min | Area mAU*min  | Height mAU     | Relative Area % | Relative Height % | Amount n.a. |
|---------------|-----------|--------------------|---------------|----------------|-----------------|-------------------|-------------|
| 1             |           | 9.907              | 43.869        | 153.364        | 97.89           | 98.98             | n.a.        |
| 2             |           | 19.583             | 0.946         | 1.573          | 2.11            | 1.02              | n.a.        |
| <b>Total:</b> |           |                    | <b>44.815</b> | <b>154.937</b> | <b>100.00</b>   | <b>100.00</b>     |             |



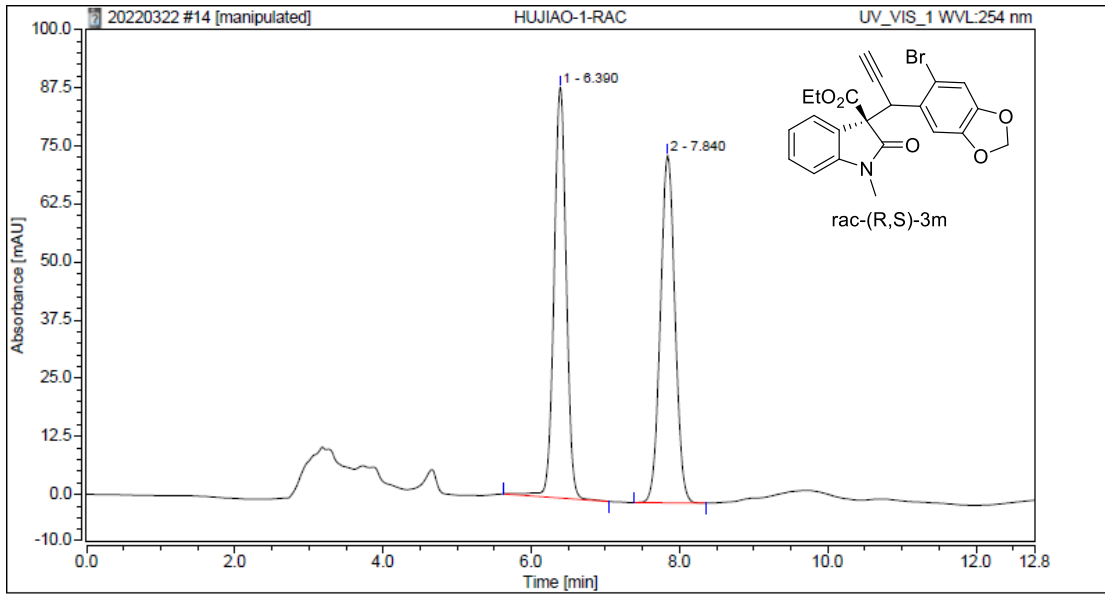

**Integration Results**

| No.           | Peak Name | Retention Time<br>min | Area<br>mAU*min | Height<br>mAU  | Relative Area<br>% | Relative Height<br>% | Amount<br>n.a. |
|---------------|-----------|-----------------------|-----------------|----------------|--------------------|----------------------|----------------|
| 1             |           | 6.390                 | 16.891          | 88.361         | 49.67              | 54.14                | n.a.           |
| 2             |           | 7.840                 | 17.114          | 74.849         | 50.33              | 45.86                | n.a.           |
| <b>Total:</b> |           |                       | <b>34.005</b>   | <b>163.211</b> | <b>100.00</b>      | <b>100.00</b>        |                |

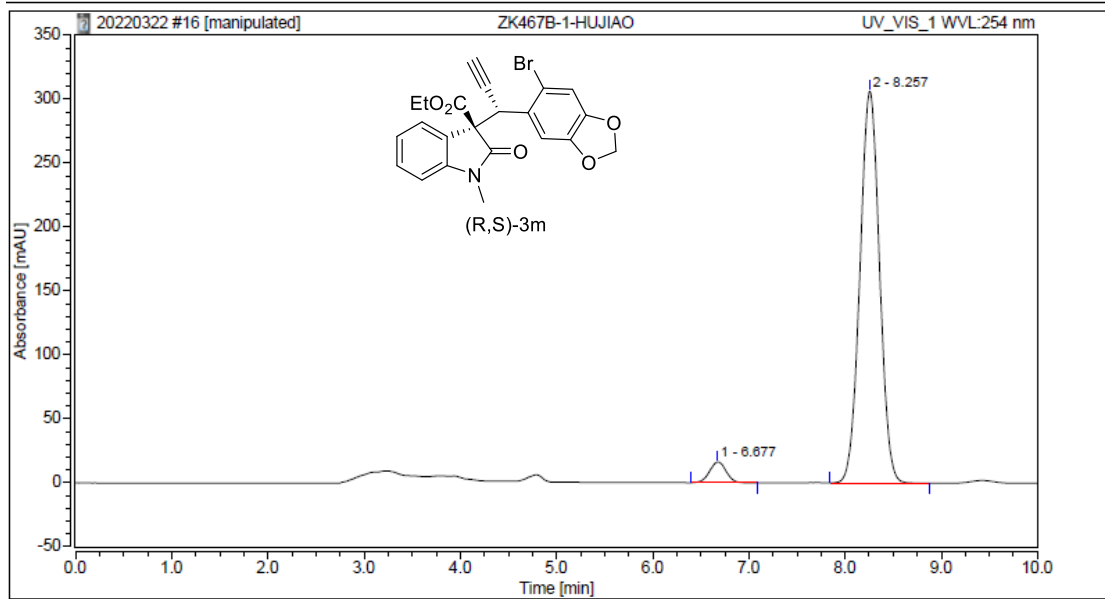

**Integration Results**

| No.           | Peak Name | Retention Time<br>min | Area<br>mAU*min | Height<br>mAU  | Relative Area<br>% | Relative Height<br>% | Amount<br>n.a. |
|---------------|-----------|-----------------------|-----------------|----------------|--------------------|----------------------|----------------|
| 1             |           | 6.677                 | 3.247           | 16.339         | 4.31               | 5.06                 | n.a.           |
| 2             |           | 8.257                 | 72.166          | 306.338        | 95.69              | 94.94                | n.a.           |
| <b>Total:</b> |           |                       | <b>75.412</b>   | <b>322.676</b> | <b>100.00</b>      | <b>100.00</b>        |                |

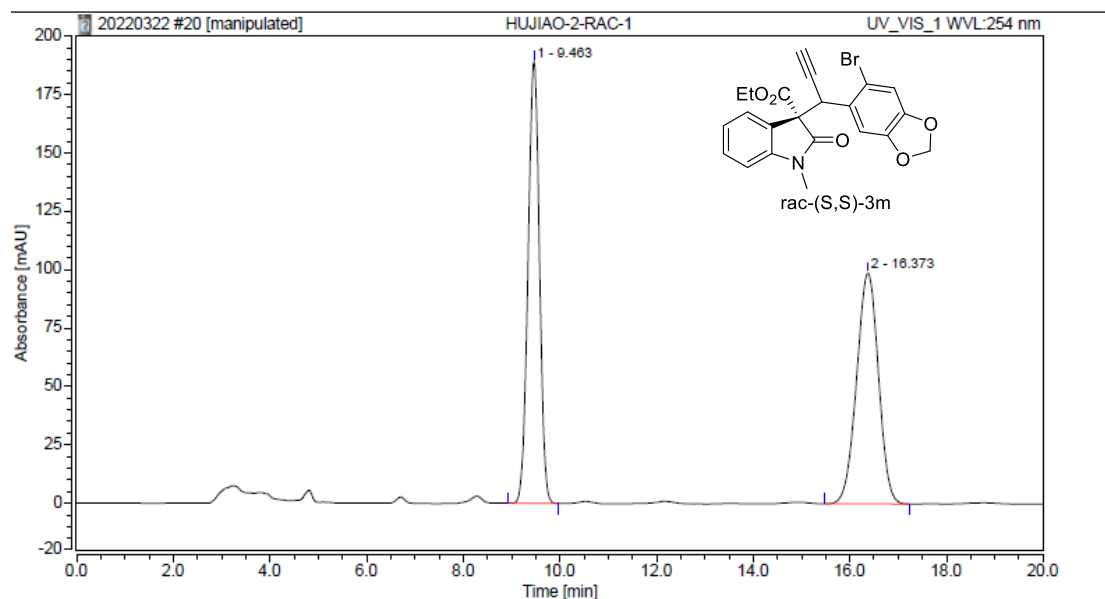

**Integration Results**

| No.           | Peak Name | Retention Time min | Area mAU*min   | Height mAU     | Relative Area % | Relative Height % | Amount n.a. |
|---------------|-----------|--------------------|----------------|----------------|-----------------|-------------------|-------------|
| 1             |           | 9.463              | 51.315         | 189.312        | 49.81           | 65.68             | n.a.        |
| 2             |           | 16.373             | 51.706         | 98.934         | 50.19           | 34.32             | n.a.        |
| <b>Total:</b> |           |                    | <b>103.020</b> | <b>288.245</b> | <b>100.00</b>   | <b>100.00</b>     |             |

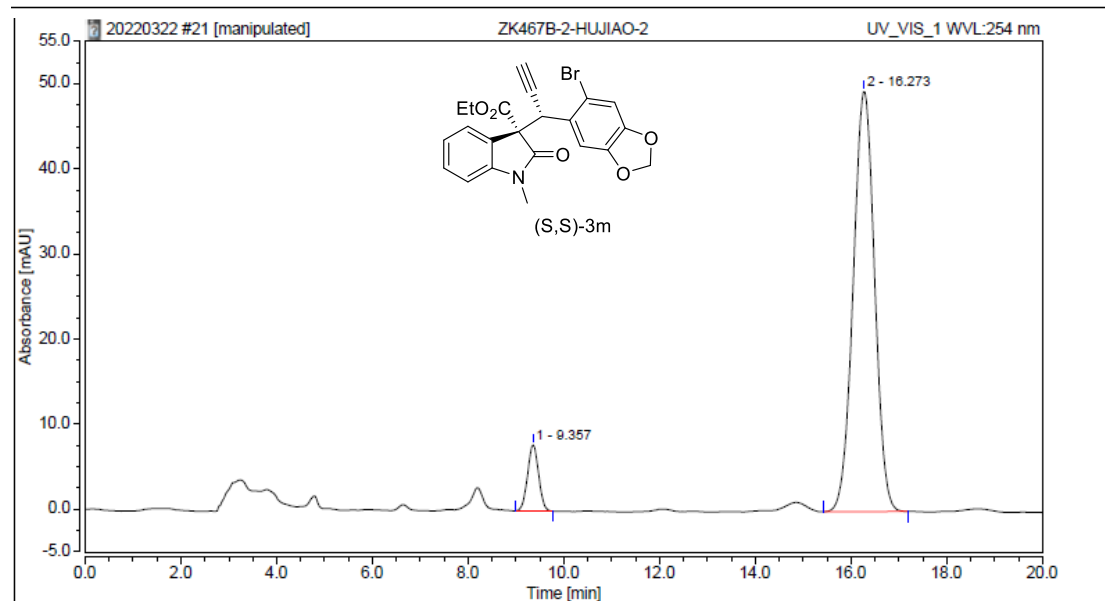

**Integration Results**

| No.           | Peak Name | Retention Time min | Area mAU*min  | Height mAU    | Relative Area % | Relative Height % | Amount n.a. |
|---------------|-----------|--------------------|---------------|---------------|-----------------|-------------------|-------------|
| 1             |           | 9.357              | 2.075         | 7.779         | 7.52            | 13.60             | n.a.        |
| 2             |           | 16.273             | 25.529        | 49.439        | 92.48           | 86.40             | n.a.        |
| <b>Total:</b> |           |                    | <b>27.604</b> | <b>57.218</b> | <b>100.00</b>   | <b>100.00</b>     |             |

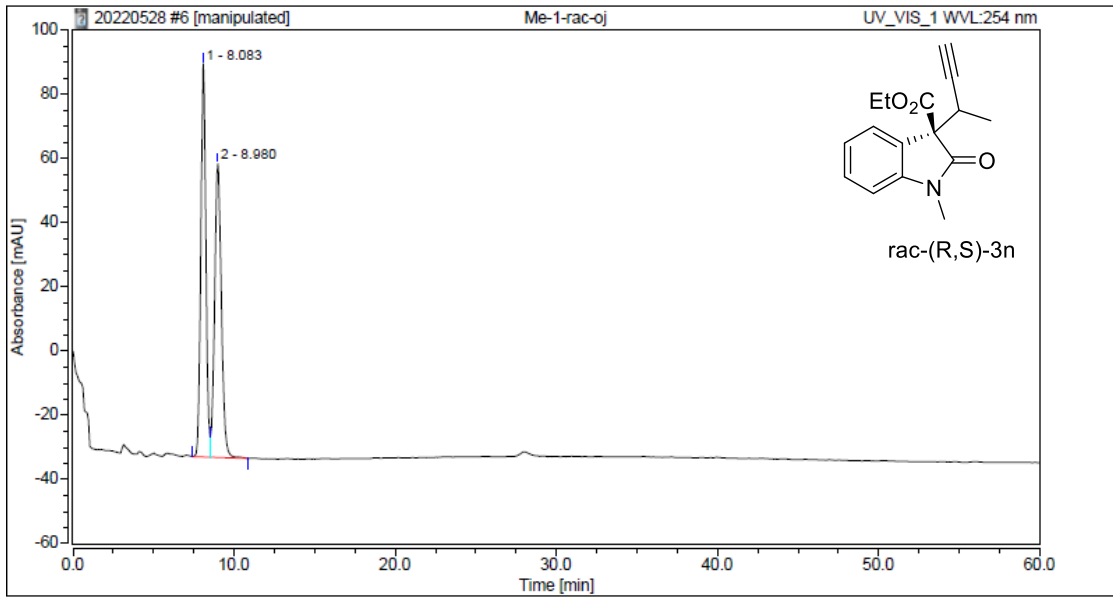

**Integration Results**

| No.           | Peak Name | Retention Time min | Area mAU*min  | Height mAU     | Relative Area % | Relative Height % | Amount n.a. |
|---------------|-----------|--------------------|---------------|----------------|-----------------|-------------------|-------------|
| 1             |           | 8.083              | 44.203        | 122.492        | 49.66           | 57.24             | n.a.        |
| 2             |           | 8.980              | 44.801        | 91.504         | 50.34           | 42.76             | n.a.        |
| <b>Total:</b> |           |                    | <b>89.004</b> | <b>213.997</b> | <b>100.00</b>   | <b>100.00</b>     |             |

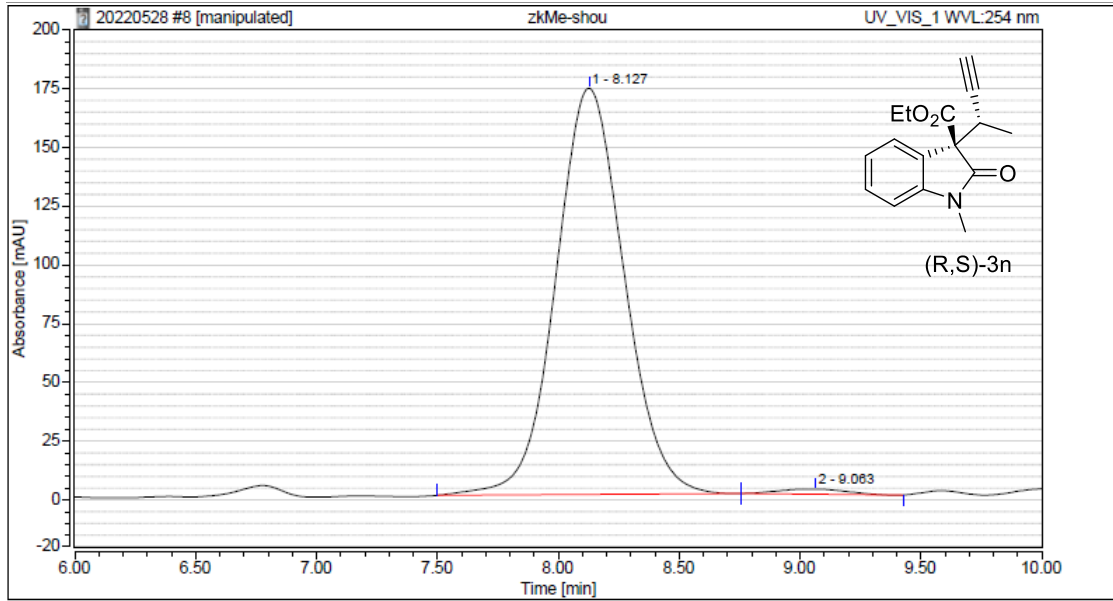

**Integration Results**

| No.           | Peak Name | Retention Time min | Area mAU*min  | Height mAU     | Relative Area % | Relative Height % | Amount n.a. |
|---------------|-----------|--------------------|---------------|----------------|-----------------|-------------------|-------------|
| 1             |           | 8.127              | 56.580        | 172.924        | 98.81           | 98.77             | n.a.        |
| 2             |           | 9.063              | 0.680         | 2.161          | 1.19            | 1.23              | n.a.        |
| <b>Total:</b> |           |                    | <b>57.259</b> | <b>175.084</b> | <b>100.00</b>   | <b>100.00</b>     |             |

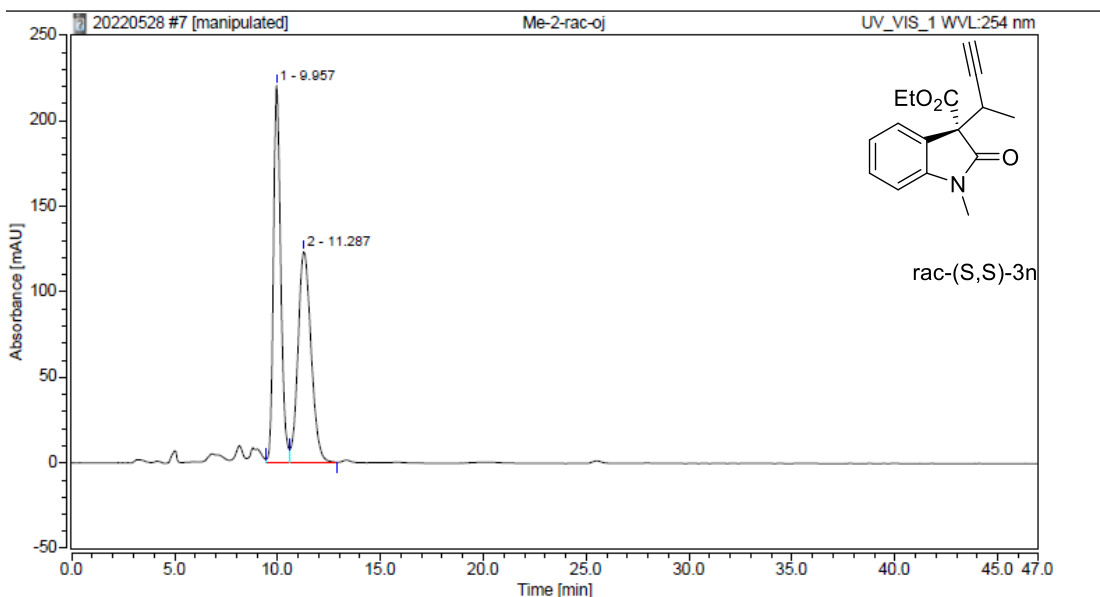

| Integration Results |           |                       |                 |               |                    |                      |                |
|---------------------|-----------|-----------------------|-----------------|---------------|--------------------|----------------------|----------------|
| No.                 | Peak Name | Retention Time<br>min | Area<br>mAU*min | Height<br>mAU | Relative Area<br>% | Relative Height<br>% | Amount<br>n.a. |
| 1                   |           | 9.957                 | 90.080          | 220.536       | 49.75              | 64.07                | n.a.           |
| 2                   |           | 11.287                | 90.986          | 123.667       | 50.25              | 35.93                | n.a.           |
| Total:              |           |                       | 181.066         | 344.202       | 100.00             | 100.00               |                |

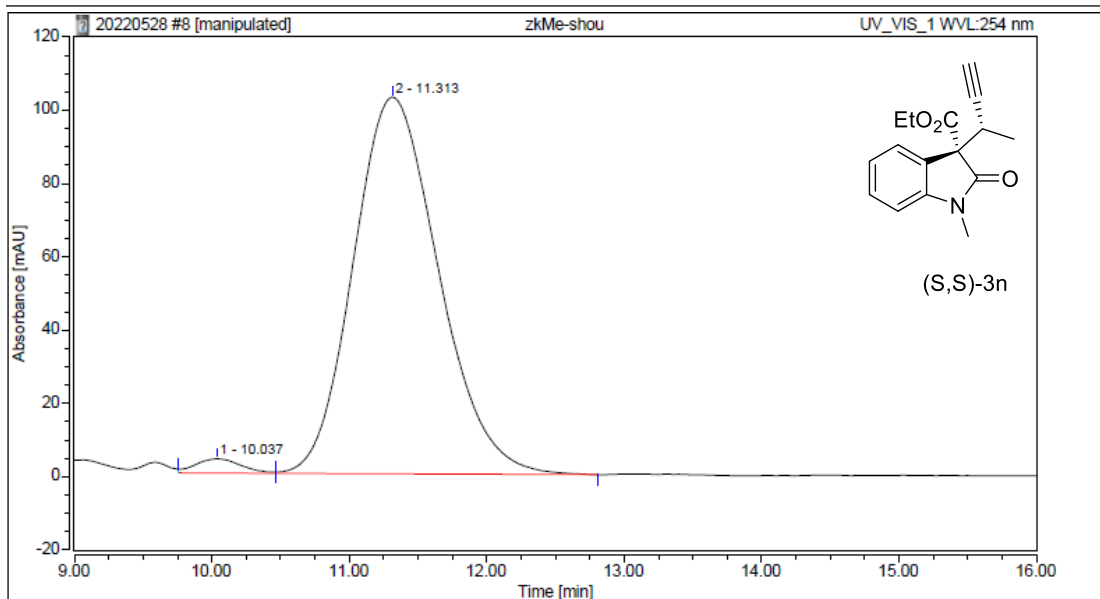

| Integration Results |           |                       |                 |               |                    |                      |                |
|---------------------|-----------|-----------------------|-----------------|---------------|--------------------|----------------------|----------------|
| No.                 | Peak Name | Retention Time<br>min | Area<br>mAU*min | Height<br>mAU | Relative Area<br>% | Relative Height<br>% | Amount<br>n.a. |
| 1                   |           | 10.037                | 1.495           | 3.896         | 1.98               | 3.65                 | n.a.           |
| 2                   |           | 11.313                | 73.911          | 102.710       | 98.02              | 96.35                | n.a.           |
| Total:              |           |                       | 75.406          | 106.606       | 100.00             | 100.00               |                |

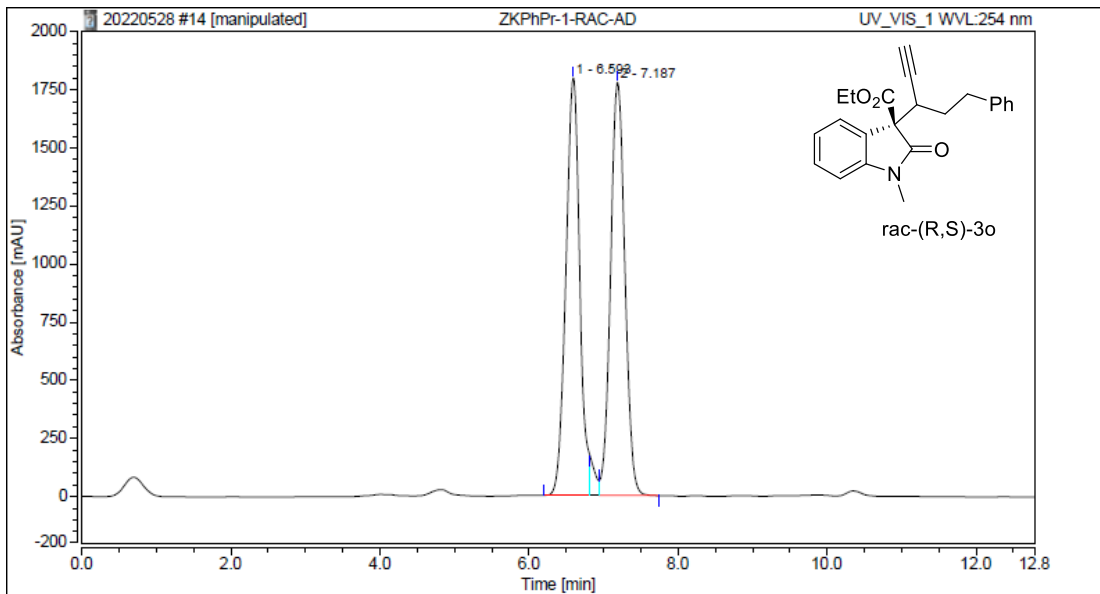

**Integration Results**

| No.           | Peak Name | Retention Time<br>min | Area<br>mAU*min | Height<br>mAU   | Relative Area<br>% | Relative Height<br>% | Amount<br>n.a. |
|---------------|-----------|-----------------------|-----------------|-----------------|--------------------|----------------------|----------------|
| 1             |           | 6.593                 | 384.395         | 1796.578        | 49.20              | 50.26                | n.a.           |
| 2             |           | 7.187                 | 396.964         | 1777.825        | 50.80              | 49.74                | n.a.           |
| <b>Total:</b> |           |                       | <b>781.359</b>  | <b>3574.404</b> | <b>100.00</b>      | <b>100.00</b>        |                |

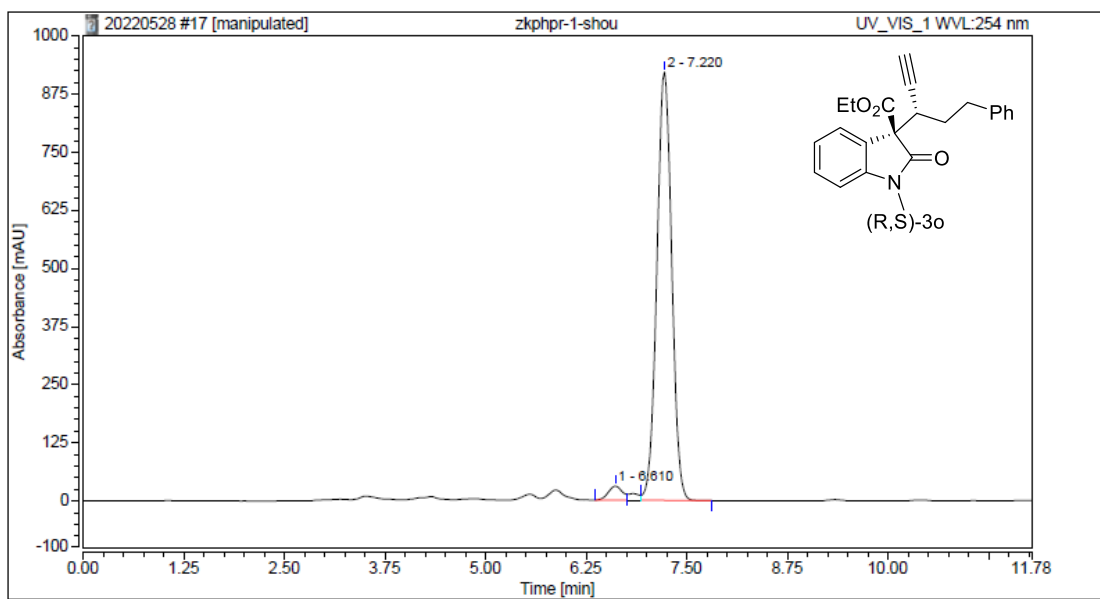

**Integration Results**

| No.           | Peak Name | Retention Time<br>min | Area<br>mAU*min | Height<br>mAU  | Relative Area<br>% | Relative Height<br>% | Amount<br>n.a. |
|---------------|-----------|-----------------------|-----------------|----------------|--------------------|----------------------|----------------|
| 1             |           | 6.610                 | 6.156           | 30.327         | 3.03               | 3.19                 | n.a.           |
| 2             |           | 7.220                 | 196.961         | 921.272        | 96.97              | 96.81                | n.a.           |
| <b>Total:</b> |           |                       | <b>203.116</b>  | <b>951.599</b> | <b>100.00</b>      | <b>100.00</b>        |                |

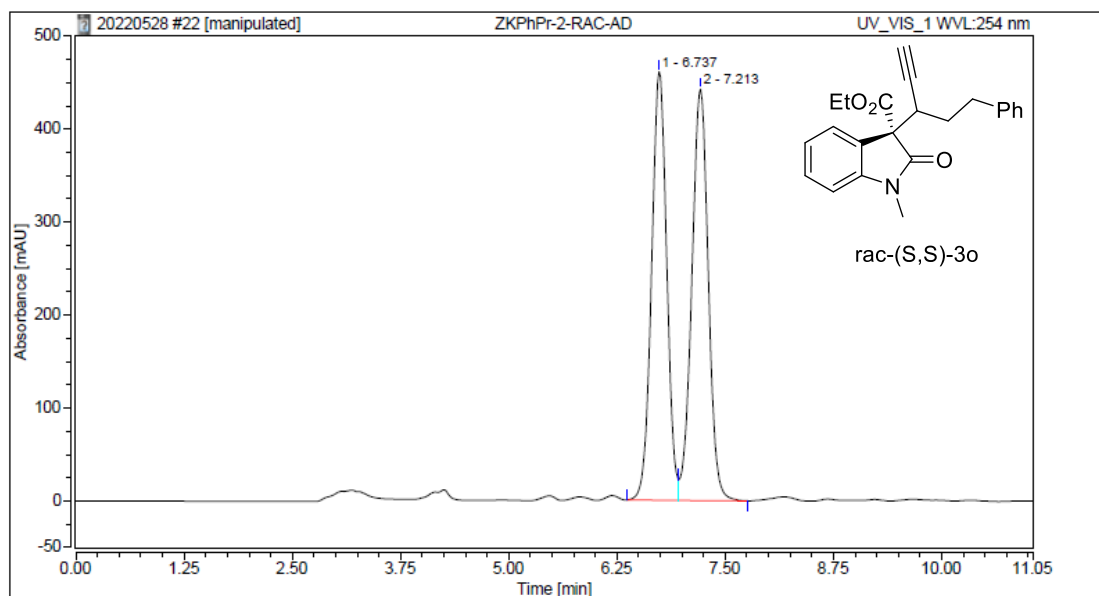

| Integration Results |           |                    |              |            |                 |                   |             |
|---------------------|-----------|--------------------|--------------|------------|-----------------|-------------------|-------------|
| No.                 | Peak Name | Retention Time min | Area mAU*min | Height mAU | Relative Area % | Relative Height % | Amount n.a. |
| 1                   |           | 6.737              | 93.182       | 460.737    | 48.91           | 51.00             | n.a.        |
| 2                   |           | 7.213              | 97.321       | 442.726    | 51.09           | 49.00             | n.a.        |
| Total:              |           |                    | 190.503      | 903.463    | 100.00          | 100.00            |             |

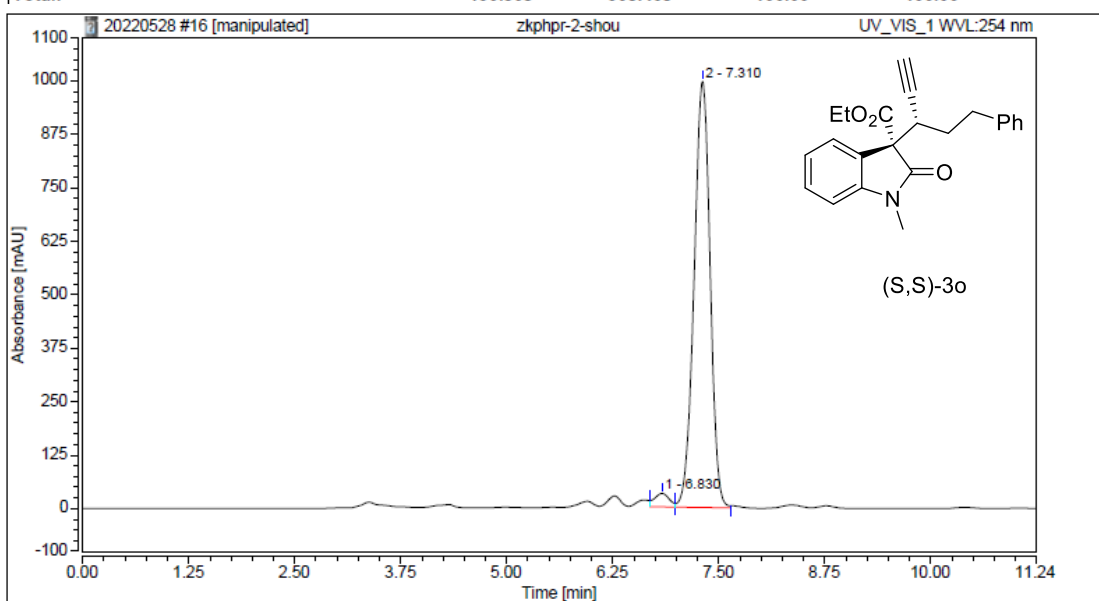

| Integration Results |           |                    |              |            |                 |                   |             |
|---------------------|-----------|--------------------|--------------|------------|-----------------|-------------------|-------------|
| No.                 | Peak Name | Retention Time min | Area mAU*min | Height mAU | Relative Area % | Relative Height % | Amount n.a. |
| 1                   |           | 6.830              | 6.489        | 31.482     | 2.88            | 3.06              | n.a.        |
| 2                   |           | 7.310              | 219.066      | 995.887    | 97.12           | 96.94             | n.a.        |
| Total:              |           |                    | 225.555      | 1027.369   | 100.00          | 100.00            |             |

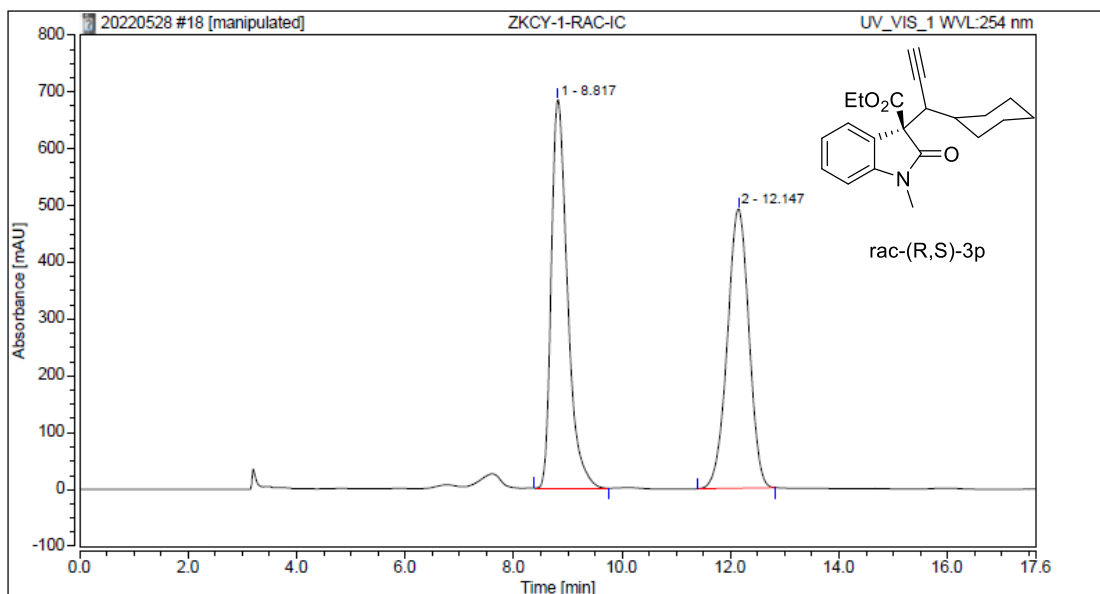

**Integration Results**

| No.    | Peak Name | Retention Time min | Area mAU*min | Height mAU | Relative Area % | Relative Height % | Amount n.a. |
|--------|-----------|--------------------|--------------|------------|-----------------|-------------------|-------------|
| 1      |           | 8.817              | 237.442      | 685.513    | 51.17           | 58.22             | n.a.        |
| 2      |           | 12.147             | 226.544      | 491.910    | 48.83           | 41.78             | n.a.        |
| Total: |           |                    | 463.987      | 1177.423   | 100.00          | 100.00            |             |

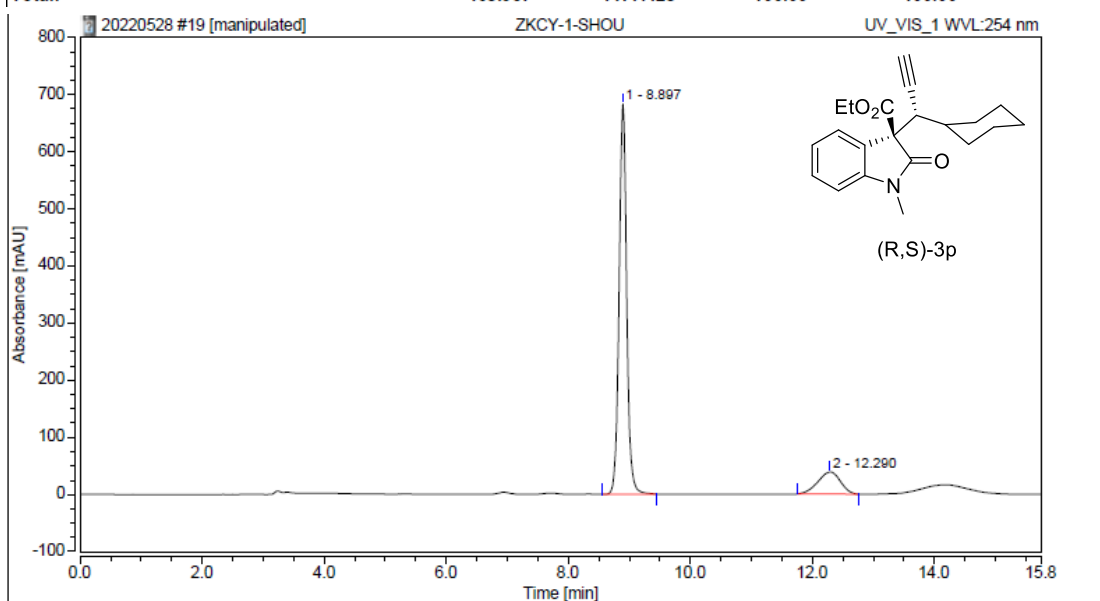

**Integration Results**

| No.    | Peak Name | Retention Time min | Area mAU*min | Height mAU | Relative Area % | Relative Height % | Amount n.a. |
|--------|-----------|--------------------|--------------|------------|-----------------|-------------------|-------------|
| 1      |           | 8.897              | 98.371       | 682.923    | 85.60           | 94.64             | n.a.        |
| 2      |           | 12.290             | 16.548       | 38.645     | 14.40           | 5.36              | n.a.        |
| Total: |           |                    | 114.920      | 721.568    | 100.00          | 100.00            |             |

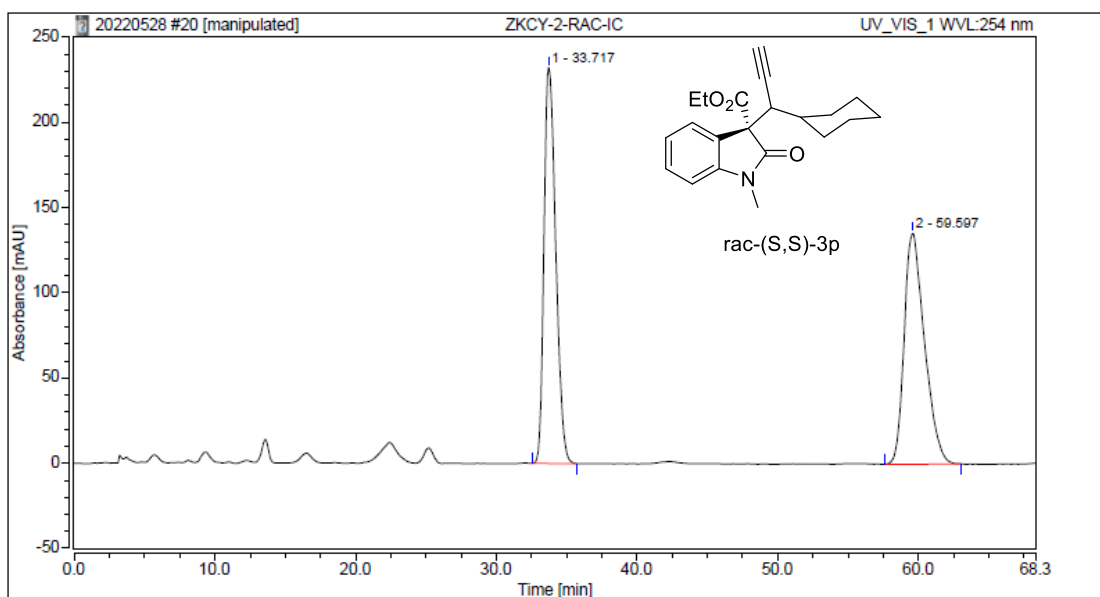

**Integration Results**

| No.           | Peak Name | Retention Time<br>min | Area<br>mAU*min | Height<br>mAU  | Relative Area<br>% | Relative Height<br>% | Amount<br>n.a. |
|---------------|-----------|-----------------------|-----------------|----------------|--------------------|----------------------|----------------|
| 1             |           | 33.717                | 224.911         | 232.325        | 49.82              | 63.12                | n.a.           |
| 2             |           | 59.597                | 226.533         | 135.769        | 50.18              | 36.88                | n.a.           |
| <b>Total:</b> |           |                       | <b>451.445</b>  | <b>368.093</b> | <b>100.00</b>      | <b>100.00</b>        |                |

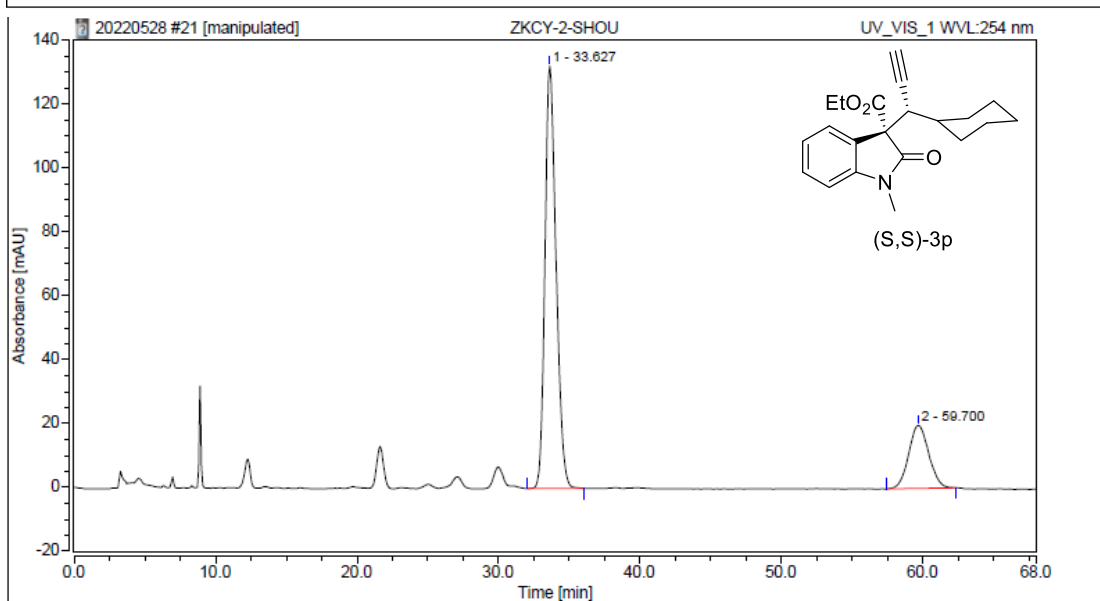

**Integration Results**

| No.           | Peak Name | Retention Time<br>min | Area<br>mAU*min | Height<br>mAU  | Relative Area<br>% | Relative Height<br>% | Amount<br>n.a. |
|---------------|-----------|-----------------------|-----------------|----------------|--------------------|----------------------|----------------|
| 1             |           | 33.627                | 120.314         | 132.179        | 78.72              | 87.02                | n.a.           |
| 2             |           | 59.700                | 32.518          | 19.716         | 21.28              | 12.98                | n.a.           |
| <b>Total:</b> |           |                       | <b>152.832</b>  | <b>151.895</b> | <b>100.00</b>      | <b>100.00</b>        |                |
